# Supplementary material for: BTB/POZ proteins and their gene family in Oryza rufipogon: Novel genes and alleles from the progenitor of the domesticated japonica rice (O. sativa L.)
Source: Research Square preprint supplement (doi:10.21203/rs.3.rs-1918471/v2), 2022-09-26
Supplement: Supplementary file 2 [file 091c0dcec3164c4f27afc8d5.xlsx]

## Sheet: Sheet1
Supplementary Table S4: List of orthologous genes
Oryza rufipogon-Oryza sativa japonica
OR1	OrBTB1.1	==	OS1	Os01t0767900-01
OR1	OrBTB1.2	==	OS1	Os01t0893400-01
OR1	OrBTB1.3	==	OS1	Os01t0908200-01
OR1	OrBTB1.4	==	OS1	Os01t0932600-01
OR1	OrBTB1.5	==	OS1	Os01t0948900-02
OR2	OrBTB2.1	==	OS2	Os02t0260700-01
OR2	OrBTB2.2	==	OS2	Os02t0309200-00
OR2	OrBTB2.6	==	OS2	Os02t0596700-00
OR2	OrBTB2.7	==	OS2	Os02t0760600-01
OR2	OrBTB2.6	==	OS4	Os04t0482300-01
OR2	OrBTB2.1	==	OS6	Os06t0507300-01
OR3	OrBTB3.3	==	OS12	Os12t0583500-01
OR3	OrBTB3.4	==	OS12	Os12t0613250-00
OR3	OrBTB3.3	==	OS3	Os03t0609800-01
OR3	OrBTB3.5	==	OS3	Os03t0667100-01
OR3	OrBTB3.6	==	OS3	Os03t0686050-00
OR3	OrBTB3.7	==	OS3	Os03t0792400-01
OR3	OrBTB3.2	==	OS3	Os03t0206700-00
OR3	OrBTB3.7	==	OS7	Os07t0167200-01
OR4	OrBTB4.4	==	OS2	Os02t0596700-00
OR4	OrBTB4.4	==	OS4	Os04t0482300-01
OR4	OrBTB4.5	==	OS4	Os04t0625400-00
OR4	OrBTB4.6	==	OS4	Os04t0636500-01
OR5	OrBTB5.2	==	OS5	Os05t0398100-01
OR6	OrBTB6.1	==	OS6	Os06t0184500-00
OR6	OrBTB6.2	==	OS6	Os06t0251200-01
OR6	OrBTB6.5	==	OS6	Os06t0668300-00
OR6	OrBTB6.8	==	OS6	Os06t0674800-01
OR7	OrBTB7.3	==	OS3	Os03t0792500-01
OR7	OrBTB7.1	==	OS7	Os07t0101400-01
OR7	OrBTB7.3	==	OS7	Os07t0167200-01
OR7	OrBTB7.4	==	OS7	Os07t0258700-01
OR7	OrBTB7.5	==	OS7	Os07t0655300-01
OR7	OrBTB7.6	==	OS7	Os07t0668800-01
OR8	OrBTB8.1	==	OS8	Os08t0103600-01
OR8	OrBTB8.2	==	OS8	Os08t0128700-01
OR8	OrBTB8.3	==	OS8	Os08t0129300-00
OR8	OrBTB8.4	==	OS8	Os08t0130600-01
OR8	OrBTB8.6	==	OS8	Os08t0226000-00
OR8	OrBTB8.9	==	OS8	Os08t0227400-00
OR8	OrBTB8.12	==	OS8	Os08t0228200-00
OR8	OrBTB8.15	==	OS8	Os08t0406500-01
OR8	OrBTB8.18	==	OS8	Os08t0495500-01
OR8	OrBTB8.19	==	OS8	Os08t0516200-00
OR8	OrBTB8.21	==	OS8	Os08t0516500-00
OR8	OrBTB8.23	==	OS8	Os08t0522700-00
OR8	OrBTB8.24	==	OS8	Os08t0523400-00
OR9	OrBTB9.2	==	OS9	Os09t0338200-00
OR9	OrBTB9.4	==	OS9	Os09t0420900-01
OR10	OrBTB10.1	==	OS10	Os10t0423300-00
OR10	OrBTB10.4	==	OS10	Os10t0425400-01
OR10	OrBTB10.7	==	OS10	Os10t0427300-02
OR10	OrBTB10.8	==	OS10	Os10t0428900-00
OR10	OrBTB10.11	==	OS10	Os10t0429200-00
OR10	OrBTB10.13	==	OS10	Os10t0430600-01
OR10	OrBTB10.14	==	OS10	Os10t0434000-00
OR10	OrBTB10.18	==	OS10	Os10t0435400-01
OR10	OrBTB10.20	==	OS10	Os10t0435900-00
OR10	OrBTB10.22	==	OS10	Os10t0439333-00
OR11	OrBTB11.1	==	OS11	Os11t0111900-01
OR11	OrBTB11.2	==	OS11	Os11t0141900-00
OR11	OrBTB11.3	==	OS11	Os11t0433200-02
OR11	OrBTB11.5	==	OS11	Os11t0619800-01
OR11	OrBTB11.1	==	OS12	Os12t0111500-02
OR11	OrBTB11.2	==	OS12	Os12t0138500-01
OR12	OrBTB12.1	==	OS11	Os11t0111900-01
OR12	OrBTB12.1	==	OS12	Os12t0111500-02
OR12	OrBTB12.2	==	OS12	Os12t0583500-01
OR12	OrBTB12.3	==	OS12	Os12t0613250-00
OR12	OrBTB12.2	==	OS3	Os03t0609800-01
Oryza rufipogon-Arabidopsis thaliana
OR3	OrBTB3.2	==	AT5	AT5G67385.1
OR7	OrBTB7.5	==	AT3	AT3G06190.1
OR8	OrBTB8.18	==	AT1	AT1G55760.1
OR11	OrBTB11.1	==	AT2	AT2G40450.1
OR11	OrBTB11.1	==	AT3	AT3G56230.1
OR12	OrBTB12.3	==	AT1	AT1G30440.1
OR12	OrBTB12.1	==	AT2	AT2G40450.1
OR12	OrBTB12.1	==	AT3	AT3G56230.1
Oryza rufipogon-Brachypodium distachyon
OR1	OrBTB1.1	==	BD2	KQK09934
OR1	OrBTB1.2	==	BD2	KQK10992
OR1	OrBTB1.3	==	BD2	KQK11109
OR1	OrBTB1.4	==	BD2	KQK11371
OR1	OrBTB1.5	==	BD2	KQK11536
OR2	OrBTB2.1	==	BD1	KQK18218
OR2	OrBTB2.1	==	BD3	KQJ94306
OR2	OrBTB2.6	==	BD3	KQK00177
OR2	OrBTB2.6	==	BD5	PNT61314
OR3	OrBTB3.2	==	BD1	KQK23018
OR3	OrBTB3.7	==	BD1	KQK12802
OR3	OrBTB3.5	==	BD1	KQK13847
OR3	OrBTB3.4	==	BD1	KQK14009
OR3	OrBTB3.3	==	BD1	KQK14216
OR3	OrBTB3.7	==	BD1	KQK20727
OR3	OrBTB3.4	==	BD4	KQJ85800
OR3	OrBTB3.3	==	BD4	KQJ86117
OR4	OrBTB4.4	==	BD3	KQK00177
OR4	OrBTB4.4	==	BD5	PNT61314
OR4	OrBTB4.5	==	BD5	PNT61888
OR4	OrBTB4.6	==	BD5	PNT61949
OR4	OrBTB4.7	==	BD5	KQJ85084
OR5	OrBTB5.2	==	BD2	KQK06379
OR6	OrBTB6.5	==	BD1	KQK17054
OR6	OrBTB6.1	==	BD1	KQK19264
OR6	OrBTB6.8	==	BD1	KQK17145
OR7	OrBTB7.4	==	BD1	KQK20215
OR7	OrBTB7.3	==	BD1	KQK20727
OR7	OrBTB7.5	==	BD1	KQK14903
OR7	OrBTB7.1	==	BD1	PNT77233
OR7	OrBTB7.3	==	BD1	KQK12802
OR8	OrBTB8.18	==	BD3	KQJ98801
OR8	OrBTB8.23	==	BD3	KQJ99039
OR8	OrBTB8.24	==	BD3	PNT68454
OR8	OrBTB8.1	==	BD3	KQJ94777
OR8	OrBTB8.4	==	BD3	KQJ94959
OR8	OrBTB8.15	==	BD3	KQJ98215
OR8	OrBTB8.6	==	BD3	KQJ95649
OR8	OrBTB8.8	==	BD3	KQJ95656
OR8	OrBTB8.9	==	BD3	KQJ95665
OR8	OrBTB8.20	==	BD3	PNT68446
OR8	OrBTB8.19	==	BD3	PNT68452
OR9	OrBTB9.4	==	BD1	KQK19264
OR9	OrBTB9.4	==	BD4	KQJ90269
OR9	OrBTB9.2	==	BD4	PNT64414
OR10	OrBTB10.1	==	BD3	KQJ96778
OR10	OrBTB10.3	==	BD3	KQJ96779
OR10	OrBTB10.7	==	BD3	KQJ96780
OR11	OrBTB11.1	==	BD4	KQJ89419
OR11	OrBTB11.6	==	BD4	KQJ87842
OR11	OrBTB11.2	==	BD4	KQJ92368
OR12	OrBTB12.3	==	BD1	KQK14009
OR12	OrBTB12.2	==	BD1	KQK14216
OR12	OrBTB12.1	==	BD4	KQJ89419
OR12	OrBTB12.2	==	BD4	KQJ86117
OR12	OrBTB12.3	==	BD4	KQJ85800
Oryza rufipogon-Sorghum bicolor
OR1	OrBTB1.1	==	SB3	EES01524
OR1	OrBTB1.2	==	SB3	EES01891
OR1	OrBTB1.3	==	SB3	EES01931
OR1	OrBTB1.4	==	SB3	EES02018
OR1	OrBTB1.5	==	SB3	OQU88196
OR2	OrBTB2.1	==	SB10	EER89830
OR2	OrBTB2.1	==	SB4	EES04878
OR2	OrBTB2.6	==	SB4	EES05370
OR2	OrBTB2.6	==	SB6	EES11006
OR3	OrBTB3.7	==	SB1	EER90754
OR3	OrBTB3.3	==	SB1	EER91236
OR3	OrBTB3.4	==	SB1	EER91175
OR3	OrBTB3.5	==	SB1	EER91108
OR3	OrBTB3.2	==	SB1	KXG39906
OR3	OrBTB3.7	==	SB2	KXG34465
OR4	OrBTB4.4	==	SB4	EES05370
OR4	OrBTB4.4	==	SB6	EES11006
OR4	OrBTB4.5	==	SB6	OQU82372
OR4	OrBTB4.6	==	SB6	EES11510
OR4	OrBTB4.7	==	SB6	EES11589
OR5	OrBTB5.2	==	SB9	EES19490
OR6	OrBTB6.1	==	SB10	EER89339
OR6	OrBTB6.5	==	SB10	OQU76843
OR6	OrBTB6.6	==	SB10	KXG20566
OR6	OrBTB6.8	==	SB10	OQU76879
OR6	OrBTB6.1	==	SB2	EER98911
OR7	OrBTB7.3	==	SB1	EER90755
OR7	OrBTB7.5	==	SB2	EER99824
OR7	OrBTB7.1	==	SB2	EER97813
OR7	OrBTB7.3	==	SB2	KXG34465
OR7	OrBTB7.4	==	SB2	OQU88783
OR8	OrBTB8.4	==	SB7	EES14497
OR8	OrBTB8.1	==	SB7	EES14358
OR8	OrBTB8.6	==	SB7	KXG24742
OR8	OrBTB8.8	==	SB7	OQU80115
OR8	OrBTB8.9	==	SB7	OQU80119
OR8	OrBTB8.12	==	SB7	EES14743
OR8	OrBTB8.19	==	SB7	KXG25569
OR8	OrBTB8.22	==	SB7	KXG25577
OR8	OrBTB8.23	==	SB7	KXG25577
OR8	OrBTB8.18	==	SB7	EES15449
OR9	OrBTB9.2	==	SB2	OQU89342
OR9	OrBTB9.4	==	SB2	EER98911
OR10	OrBTB10.1	==	SB1	EER91608
OR10	OrBTB10.7	==	SB1	EER91611
OR10	OrBTB10.1	==	SB1	EER91588
OR10	OrBTB10.2	==	SB1	EER94211
OR10	OrBTB10.11	==	SB1	OQU91745
OR11	OrBTB11.1	==	SB5	EES09114
OR11	OrBTB11.2	==	SB5	EES09234
OR11	OrBTB11.4	==	SB5	EES08857
OR11	OrBTB11.2	==	SB8	EES16520
OR12	OrBTB12.2	==	SB1	EER91236
OR12	OrBTB12.3	==	SB1	EER91175
OR12	OrBTB12.1	==	SB5	EES09114
OR12	OrBTB12.2	==	SB8	KXG23824
