# Supplementary material for: BTB/POZ proteins and their gene family in Oryza rufipogon: Novel genes and alleles from the progenitor of the domesticated japonica rice (O. sativa L.)
Source: Research Square preprint supplement (doi:10.21203/rs.3.rs-1918471/v2), 2022-09-26
Supplement: Supplementary file 3 [file 1062403d7dc3c1321e56ee44.xlsx]

## Sheet: Sheet1
Supplementary Table S2: General properties of Oryza rufipogon BTB/POZ genes and proteins
Gene name	Gene id	Chromosme	position	Molecular weight	Isoelectric point	Exon number	Subcellular lcalization
OrBTB1.1	ORUFI01G35500	1	29773498-29777924	68438	5.749	4	Nuclear
OrBTB1.2	ORUFI01G43500	1	35768106-35772526	65911.5	8.044	7	Nuclear
OrBTB1.3	ORUFI01G44480	1	36415058-36420919	32659.5	8.527	5	Nuclear
OrBTB1.4	ORUFI01G46370	1	37785954-37791527	89356.1	5.498	13	Extracellular
OrBTB1.5	ORUFI01G47340	1	38515148-38517892	53317	6.113	2	Chloroplast
OrBTB2.1	ORUFI02G11310	2	8415835-8421213	62342.5	4.719	6	Nuclear
OrBTB2.2	ORUFI02G13980	2	11252248-11256777	59857.8	6.214	2	Cytoplasmic
OrBTB2.3	ORUFI02G14000	2	11262813-11263598	29073.4	7.599	1	Chloroplast
OrBTB2.4	ORUFI02G14020	2	11302738-11303709	36453.5	6.792	1	PlasmaMembrane
OrBTB2.5	ORUFI02G14050	2	11332062-11332646	21523.3	4.271	1	Cytoplasmic
OrBTB2.6	ORUFI02G24050	2	21810842-21813652	38720.9	10.554	4	Chloroplast
OrBTB2.7	ORUFI02G34930	2	30079290-30080673	22792.2	7.405	2	Mitochondrial
OrBTB3.1	ORUFI03G07610	3	5149102-5154295	66655.6	7.807	5	Nuclear
OrBTB3.2	ORUFI03G07690	3	5209412-5211929	37547.4	9.477	5	Nuclear
OrBTB3.3	ORUFI03G26720	3	21780493-21786699	74863.5	7.389	6	Nuclear
OrBTB3.4	ORUFI03G28320	3	23339552-23344283	69563.2	6.598	4	Cytoplasmic
OrBTB3.5	ORUFI03G29880	3	24810652-24813212	65047	6.03	4	Nuclear
OrBTB3.6	ORUFI03G31230	3	25866630-25869458	29159.7	5.509	8	Cytoplasmic
OrBTB3.7	ORUFI03G38580	3	31255722-31271464	107924	5.437	15	PlasmaMembrane
OrBTB4.1	ORUFI04G02660	4	3032955-3066729	122473	5.435	9	PlasmaMembrane
OrBTB4.2	ORUFI04G02670	4	3066738-3067790	34182.3	7.205	2	Chloroplast
OrBTB4.3	ORUFI04G14290	4	17552387-17583280	225524	5.898	11	Cytoplasmic
OrBTB4.4	ORUFI04G17810	4	20025107-20027738	32607.2	6.942	3	Nuclear
OrBTB4.5	ORUFI04G27660	4	27173539-27190205	164251	6.686	5	PlasmaMembrane
OrBTB4.6	ORUFI04G28350	4	27614783-27619069	70029.3	4.729	4	Cytoplasmic
OrBTB4.7	ORUFI04G29880	4	28716897-28717952	38688.9	7.756	1	Mitochondrial
OrBTB5.1	ORUFI05G13500	5	13805947-13812144	83825.7	5.917	12	PlasmaMembrane
OrBTB5.2	ORUFI05G16760	5	16721170-16729571	82063.7	6.171	19	Cytoplasmic
OrBTB5.3	ORUFI05G24530	5	22753151-22753954	22706.4	5.895	3	Chloroplast
OrBTB5.4	ORUFI05G24550	5	22754701-22755749	37183	6.005	2	Chloroplast
OrBTB6.1	ORUFI06G05610	6	3840022-3843562	70057.8	5.86	4	Chloroplast
OrBTB6.2	ORUFI06G09880	6	7307788-7308846	39024.8	5.487	1	PlasmaMembrane
OrBTB6.3	ORUFI06G13380	6	11094475-11100881	65969.7	4.713	8	Cytoplasmic
OrBTB6.4	ORUFI06G17340	6	16542356-16547758	60551.9	5.444	6	Nuclear
OrBTB6.5	ORUFI06G25930	6	24682339-24683418	38893.3	4.84	2	Chloroplast
OrBTB6.6	ORUFI06G25940	6	24685319-24686413	39518.1	5.993	1	Cytoplasmic
OrBTB6.7	ORUFI06G25950	6	24704703-24708176	35534.2	6.666	5	Cytoplasmic
OrBTB6.8	ORUFI06G26390	6	25022988-25033209	126229	7.718	11	PlasmaMembrane
OrBTB7.1	ORUFI07G00140	7	72336-75278	43753.6	6.198	4	Cytoplasmic
OrBTB7.2	ORUFI07G01530	7	1128099-1131876	59531.1	7.149	4	Nuclear
OrBTB7.3	ORUFI07G04060	7	3272015-3275179	46159.7	5.138	4	Nuclear
OrBTB7.4	ORUFI07G09430	7	8186842-8190576	27990.5	4.711	2	Nuclear
OrBTB7.5	ORUFI07G25720	7	24091382-24101310	47049.8	6.297	11	Chloroplast
OrBTB7.6	ORUFI07G26650	7	24746386-24747705	48201	4.898	1	Cytoplasmic
OrBTB8.1	ORUFI08G00320	8	199766-201895	37847.5	6.946	4	PlasmaMembrane
OrBTB8.2	ORUFI08G02030	8	1488384-1491731	73227.9	4.566	2	Cytoplasmic
OrBTB8.3	ORUFI08G02060	8	1505284-1506096	29975.6	4.956	1	Cytoplasmic
OrBTB8.4	ORUFI08G02180	8	1581782-1586831	71298	6.002	4	Nuclear
OrBTB8.5	ORUFI08G06330	8	5107454-5108505	35733.2	6.831	2	Chloroplast
OrBTB8.6	ORUFI08G07460	8	6795984-6801493	58906.9	5.591	6	Cytoplasmic
OrBTB8.7	ORUFI08G07490	8	6819641-6820738	40487.1	4.991	1	Cytoplasmic
OrBTB8.8	ORUFI08G07520	8	6837101-6843097	67510	5.058	5	Chloroplast
OrBTB8.9	ORUFI08G07540	8	6853297-6857273	44979.1	7.473	2	Cytoplasmic
OrBTB8.10	ORUFI08G07550	8	6857286-6858353	39155	5.108	1	Nuclear
OrBTB8.11	ORUFI08G07560	8	6872061-6875114	38464.1	5.806	3	Nuclear
OrBTB8.12	ORUFI08G07610	8	6923784-6924938	42654.7	6.098	1	Chloroplast
OrBTB8.13	ORUFI08G07650	8	6953540-6955537	55026.2	4.978	3	Chloroplast
OrBTB8.14	ORUFI08G12680	8	13513985-13515244	44739.9	5.909	1	Chloroplast
OrBTB8.15	ORUFI08G16010	8	17475603-17476781	42580.8	7.997	1	Chloroplast
OrBTB8.16	ORUFI08G16020	8	17480479-17481663	43224.7	5.251	1	Chloroplast
OrBTB8.17	ORUFI08G16050	8	17490288-17491118	30753.6	5.773	1	Chloroplast
OrBTB8.18	ORUFI08G21400	8	22106787-22110559	37551.1	6.202	4	Cytoplasmic
OrBTB8.19	ORUFI08G22900	8	23241283-23241900	22095.5	7.549	1	Extracellular
OrBTB8.20	ORUFI08G22910	8	23242083-23242760	24975	5.996	2	PlasmaMembrane
OrBTB8.21	ORUFI08G22920	8	23242867-23251114	76754.3	9.566	9	Nuclear
OrBTB8.22	ORUFI08G22930	8	23251198-23252140	27578	7.172	2	Mitochondrial
OrBTB8.23	ORUFI08G23440	8	23617355-23630737	107161	6.31	7	PlasmaMembrane
OrBTB8.24	ORUFI08G23450	8	23630817-23664727	281117	6.258	16	Chloroplast
OrBTB9.1	ORUFI09G02090	9	2853825-2856031	28057.5	5.594	2	PlasmaMembrane
OrBTB9.2	ORUFI09G06910	9	8596129-8597280	41464	5.081	1	Extracellular
OrBTB9.3	ORUFI09G06920	9	8613081-8614265	43331.8	7.458	1	Nuclear
OrBTB9.4	ORUFI09G11290	9	12976742-12981754	68319.4	7.804	4	Nuclear
OrBTB10.1	ORUFI10G11040	10	13120700-13122618	41908.5	5.76	2	Cytoplasmic
OrBTB10.2	ORUFI10G11050	10	13123433-13136351	64872	6.482	7	Cytoplasmic
OrBTB10.3	ORUFI10G11060	10	13136362-13137549	42738.8	4.528	1	Cytoplasmic
OrBTB10.4	ORUFI10G11080	10	13154518-13168431	111191	5.736	8	Nuclear
OrBTB10.5	ORUFI10G11090	10	13185198-13202827	127796	5.97	8	Chloroplast
OrBTB10.6	ORUFI10G11100	10	13215317-13223574	118698	5.958	5	Chloroplast
OrBTB10.7	ORUFI10G11140	10	13268955-13270046	40272.1	6.021	1	Cytoplasmic
OrBTB10.8	ORUFI10G11150	10	13273987-13280511	52471.8	5.486	2	Chloroplast
OrBTB10.9	ORUFI10G11160	10	13280674-13288869	49944.9	7.641	5	Cytoplasmic
OrBTB10.10	ORUFI10G11180	10	13295892-13321288	118435	5.436	10	Cytoplasmic
OrBTB10.11	ORUFI10G11190	10	13290819-13291994	40699.3	4.427	3	Nuclear
OrBTB10.12	ORUFI10G11200	10	13300353-13302181	42627.8	5.236	2	Cytoplasmic
OrBTB10.13	ORUFI10G11230	10	13338562-13350255	106155	7.96	18	PlasmaMembrane
OrBTB10.14	ORUFI10G11410	10	13469224-13470336	40929.5	6.124	1	Chloroplast
OrBTB10.15	ORUFI10G11420	10	13473370-13475415	46343.7	6.082	2	Mitochondrial
OrBTB10.16	ORUFI10G11450	10	13491527-13495987	46959.4	4.884	2	PlasmaMembrane
OrBTB10.17	ORUFI10G11470	10	13503937-13507039	59427.9	5.059	4	Cytoplasmic
OrBTB10.18	ORUFI10G11500	10	13512264-13513343	40342.2	6.2	1	PlasmaMembrane
OrBTB10.19	ORUFI10G11510	10	13521107-13522174	39671.2	6.587	1	Chloroplast
OrBTB10.20	ORUFI10G11550	10	13541015-13549463	79220.6	5.13	4	PlasmaMembrane
OrBTB10.21	ORUFI10G11570	10	13589344-13590466	30903.5	7.513	2	Mitochondrial
OrBTB10.22	ORUFI10G11820	10	13746184-13748086	41946.6	5.719	4	Mitochondrial
OrBTB10.23	ORUFI10G11830	10	13748792-13750921	40136.2	5.977	4	PlasmaMembrane
OrBTB11.1	ORUFI11G00700	11	475814-477494	29187.1	5.448	4	Cytoplasmic
OrBTB11.2	ORUFI11G02560	11	1806999-1818336	40202.5	4.883	4	Cytoplasmic
OrBTB11.3	ORUFI11G12230	11	13089305-13118036	79397.7	6.083	14	PlasmaMembrane
OrBTB11.4	ORUFI11G21310	11	23886556-23887608	38167.5	6.497	1	Chloroplast
OrBTB11.5	ORUFI11G21540	11	24042120-24046642	68751.7	6.605	4	Mitochondrial
OrBTB11.6	ORUFI11G21740	11	24152807-24155010	18493.9	5.512	2	Cytoplasmic
OrBTB11.7	ORUFI11G21760	11	24163335-24164447	40235.5	5.407	1	Chloroplast
OrBTB11.8	ORUFI11G22110	11	24546702-24553257	96910.3	7.101	4	Chloroplast
OrBTB11.9	ORUFI11G22120	11	24566308-24567121	27459.9	6.346	2	Chloroplast
OrBTB11.10	ORUFI11G22130	11	24567137-24577587	110503	6.648	7	Chloroplast
OrBTB11.11	ORUFI11G22170	11	24621150-24622328	42053.4	4.848	1	Chloroplast
OrBTB11.12	ORUFI11G24540	11	26726321-26727145	29165.6	9.309	2	Mitochondrial
OrBTB12.1	ORUFI12G00820	12	581966-583635	29376.3	5.793	4	Cytoplasmic
OrBTB12.2	ORUFI12G19040	12	20497690-20502383	69625	5.248	4	Nuclear
OrBTB12.3	ORUFI12G20870	12	22054602-22058996	72075.7	5.638	4	Nuclear
