# Supplementary material for: BTB/POZ proteins and their gene family in Oryza rufipogon: Novel genes and alleles from the progenitor of the domesticated japonica rice (O. sativa L.)
Source: Research Square preprint supplement (doi:10.21203/rs.3.rs-1918471/v2), 2022-09-26
Supplement: Supplementary file 5 [file 33830b21779db7ddb6e01dd6.xlsx]

## Sheet: Sheet1
Supplementary Table S6: Coding sequence variation of selected orthologous OrBTB/POZ genes
	Ensembl Id	Gene	Coding exons	Transcript length (bps)	Translation length (residues)
	Oryza
Block 1	ORUFI01G43500	OrBTB1.2	7	1769	588
	Os01t0893400-01	Os01t0893400-01	5	2088	413
	ORUFI01G44480	OrBTB1.3	5	2792	299
	Os01t0908200-01	Os01t0908200-01	5	1446	347
	ORUFI01G46370	OrBTB1.4	13	3092	819
	Os01t0932600-01	Os01t0932600-01	13	2838	806
	ORUFI01G47340	OrBTB1.5	2	1521	506
	Os01t0948900-02	Os01t0948900-02	1	1255	337
Block 2	ORUFI08G22900	OrBTB8.19	1	618	205
	Os08t0516200-00	Os08t0516200-00	1	852	274
	ORUFI08G22920	OrBTB8.21	9	2070	689
	Os08t0516500-00	Os08t0516500-00	2	631	208
	ORUFI08G23440	OrBTB8.23	7	2943	980
	Os08t0516500-00	Os08t0522700-00	1	1063	341
	ORUFI08G23450	OrBTB8.24	16	7716	2571
	Os08t0523400-00	Os08t0523400-00	1	1146	361
Block 3	ORUFI10G11040	OrBTB10.1	2	1143	380
	Os10t0423300-00	Os10t0423300-00	1	1149	382
	ORUFI10G11080	OrBTB10.4	8	3254	1024
	Os10t0425400-01	Os10t0425400-01	1	1261	415
	ORUFI10G11140	OrBTB10.7	1	1092	363
	Os10t0427300-02	Os10t0427300-02	2	2652	375
	ORUFI10G11150	OrBTB10.8	2	1407	468
	Os10t0428900-00	Os10t0428900-00	2	906	301
	ORUFI10G11190	OrBTB10.11	3	1110	369
	Os10t0429200-00	Os10t0429200-00	1	1165	156
	ORUFI10G11230	OrBTB10.13	17	3665	743
	Os10t0430600-01	Os10t0430600-01	7	1232	261
	ORUFI10G11410	OrBTB10.14	1	1113	370
	Os10t0434000-00	Os10t0434000-00	1	1113	370
	ORUFI10G11500	OrBTB10.18	1	1080	359
	Os10t0435400-01	Os10t0435400-01	1	3515	355
	ORUFI10G11550	OrBTB10.20	4	2148	715
	Os10t0435900-00	Os10t0435900-00	1	1142	270
	ORUFI10G11820	OrBTB10.22	4	1146	381
	Os10t0439333-00	Os10t0439333-00	1	935	267
Brachypodium
	ORUFI04G29880	OrBTB4.7	1	1056	351
	KQJ85084	KQJ85084	2	1537	385
	ORUFI08G07520	OrBTB8.8	5	1832	609
	KQJ95656	KQJ95656	1	1517	367
	ORUFI08G22910	OrBTB8.20	2	669	222
	PNT68446	PNT68446	1	2688	233
	ORUFI10G11060	OrBTB10.3	1	1188	395
	KQJ96779	KQJ96779	1	1071	356
	ORUFI11G21740	OrBTB11.6	2	510	169
	KQJ87842	KQJ87842	2	1116	371
Sorghum
	ORUFI04G29880	OrBTB4.7	1	1056	351
	EES11589	EES11589	1	2468	335
	ORUFI06G25940	OrBTB6.6	1	1095	364
	KXG20566	KXG20566	1	1844	363
	ORUFI08G07520	OrBTB8.8	5	1832	609
	OQU80115	OQU80115	1	1354	350
	ORUFI08G22930	OrBTB8.22	2	744	247
	KXG25577	KXG25577	2	1613	343
	ORUFI10G11050	OrBTB10.2	7	1754	583
	EER94211	EER94211	1	1095	364
	ORUFI11G21310	OrBTB11.4	1	1053	350
	EES08857	EES08857	2	1098	365
