# Supplementary material for: BTB/POZ proteins and their gene family in Oryza rufipogon: Novel genes and alleles from the progenitor of the domesticated japonica rice (O. sativa L.)
Source: Research Square preprint supplement (doi:10.21203/rs.3.rs-1918471/v2), 2022-09-26
Supplement: Supplementary file 6 [file 353b95bf20dae434dbbbbb1a.xlsx]

## Sheet: Sheet1
Supplementary Table S5: List of cis-acting regulatory elements in the Oryza rufipogon BTB/POZ genes
Gene id	cis-acting regulatory element	Staring location	Ending location
OrBTB1.1	ABRE	341	336
OrBTB1.1	ABRE	375	370
OrBTB1.1	ABRE	1046	1041
OrBTB1.1	Myb-binding site	1267	1261
OrBTB1.1	Myb-binding site	1289	1283
OrBTB1.1	Myb	1542	1536
OrBTB1.1	ABRE4	1854	1848
OrBTB1.1	STRE	110	105
OrBTB1.1	MBS	1542	1536
OrBTB1.1	TGACG-motif	343	338
OrBTB1.1	TGACG-motif	372	367
OrBTB1.1	CCGTCC motif	823	817
OrBTB1.1	CCGTCC motif	1950	1944
OrBTB1.1	ABRE3a	375	369
OrBTB1.1	GT1-motif	1528	1522
OrBTB1.1	GATA-motif	1632	1623
OrBTB1.1	as-1	343	338
OrBTB1.1	as-1	372	367
OrBTB1.1	ERE	1616	1608
OrBTB1.1	ERE	1782	1774
OrBTB1.1	MYC	146	140
OrBTB1.1	MYC	1080	1074
OrBTB1.1	MYC	1908	1902
OrBTB1.1	WUN-motif	540	531
OrBTB1.1	WUN-motif	541	533
OrBTB1.1	GC-motif	874	868
OrBTB1.1	MYB	1144	1138
OrBTB1.1	MYB	1267	1261
OrBTB1.1	MYB	1289	1283
OrBTB1.1	CCGTCC-box	823	817
OrBTB1.1	CCGTCC-box	1950	1944
OrBTB1.1	A-box	823	817
OrBTB1.1	A-box	1950	1944
OrBTB1.1	G-box	152	146
OrBTB1.1	G-box	157	151
OrBTB1.1	G-box	375	369
OrBTB1.1	G-box	1046	1038
OrBTB1.1	CGTCA-motif	156	151
OrBTB1.1	WRE3	630	624
OrBTB1.2	Myc	1028	1021
OrBTB1.2	ABRE	1116	1111
OrBTB1.2	ABRE	1776	1770
OrBTB1.2	ABRE	1932	1923
OrBTB1.2	ABRE	1934	1928
OrBTB1.2	Myb-binding site	1401	1395
OrBTB1.2	Myb-binding site	1426	1420
OrBTB1.2	Myb	1000	994
OrBTB1.2	TCA-element	980	971
OrBTB1.2	STRE	1249	1244
OrBTB1.2	G-Box	1776	1770
OrBTB1.2	G-Box	1934	1928
OrBTB1.2	Pc-CMA2c	1641	1632
OrBTB1.2	MBS	1000	994
OrBTB1.2	TGACG-motif	1841	1836
OrBTB1.2	GARE-motif	168	161
OrBTB1.2	ABRE3a	1116	1110
OrBTB1.2	ARE	1631	1625
OrBTB1.2	as-1	1841	1836
OrBTB1.2	MYC	126	120
OrBTB1.2	MYC	1865	1859
OrBTB1.2	Sp1	1678	1672
OrBTB1.2	Sp1	1687	1681
OrBTB1.2	TC-rich repeats	1027	1018
OrBTB1.2	TGA-element	731	725
OrBTB1.2	MYB	84	78
OrBTB1.2	MYB	596	590
OrBTB1.2	MYB	723	717
OrBTB1.2	MYB	1132	1126
OrBTB1.2	MYB	1401	1395
OrBTB1.2	MYB	1426	1420
OrBTB1.2	TCT-motif	1027	1021
OrBTB1.2	LTR	1850	1844
OrBTB1.2	CGTCA-motif	109	104
OrBTB1.2	CGTCA-motif	888	883
OrBTB1.2	CGTCA-motif	1905	1900
OrBTB1.2	G-box	1116	1110
OrBTB1.2	G-box	1776	1770
OrBTB1.2	G-box	1906	1900
OrBTB1.2	G-box	1929	1919
OrBTB1.2	G-box	1933	1925
OrBTB1.2	G-box	1934	1928
OrBTB1.2	dOCT	1437	1429
OrBTB1.2	DRE core	1758	1752
OrBTB1.2	DRE core	1810	1804
OrBTB1.3	CGTCA-motif	1898	1893
OrBTB1.3	G-box	1929	1923
OrBTB1.3	DRE core	1625	1619
OrBTB1.3	MYB-like sequence	1565	1559
OrBTB1.3	WUN-motif	658	649
OrBTB1.3	GC-motif	1330	1324
OrBTB1.3	GC-motif	1413	1407
OrBTB1.3	circadian	38	29
OrBTB1.3	MBS	1894	1888
OrBTB1.3	ABRE3a	1929	1923
OrBTB1.3	GARE-motif	797	790
OrBTB1.3	GARE-motif	1072	1065
OrBTB1.3	CCGTCC motif	1396	1390
OrBTB1.3	RY-element	1155	1147
OrBTB1.3	AuxRR-core	848	841
OrBTB1.3	Myb	1894	1888
OrBTB1.3	CAT-box	597	591
OrBTB1.3	STRE	191	186
OrBTB1.3	STRE	229	224
OrBTB1.3	CCGTCC-box	1396	1390
OrBTB1.3	A-box	1396	1390
OrBTB1.3	WRE3	1307	1301
OrBTB1.3	TCT-motif	1717	1711
OrBTB1.3	MYB	1356	1350
OrBTB1.3	MYB	1565	1559
OrBTB1.3	GT1-motif	582	575
OrBTB1.3	GT1-motif	583	577
OrBTB1.3	GT1-motif	719	713
OrBTB1.3	ARE	1086	1080
OrBTB1.3	AAGAA-motif	827	820
OrBTB1.3	Myb-binding site	1356	1350
OrBTB1.3	ABRE	1142	1137
OrBTB1.3	ABRE	1262	1257
OrBTB1.3	ABRE	1280	1275
OrBTB1.3	ABRE	1422	1417
OrBTB1.3	ABRE	1929	1924
OrBTB1.3	ABRE	1937	1932
OrBTB1.3	ATC-motif	541	533
OrBTB1.3	W box	479	473
OrBTB1.3	W box	624	618
OrBTB1.4	TGA-element	1233	1227
OrBTB1.4	MYB	195	189
OrBTB1.4	as-1	1327	1322
OrBTB1.4	WUN-motif	1705	1697
OrBTB1.4	E2Fb	655	647
OrBTB1.4	MYC	1574	1568
OrBTB1.4	G-box	1227	1221
OrBTB1.4	G-box	1253	1247
OrBTB1.4	G-box	1403	1392
OrBTB1.4	CGTCA-motif	465	460
OrBTB1.4	CGTCA-motif	1226	1221
OrBTB1.4	WRE3	968	962
OrBTB1.4	Myb	815	809
OrBTB1.4	TCA-element	116	107
OrBTB1.4	W box	438	432
OrBTB1.4	Box 4	1266	1260
OrBTB1.4	Box 4	1559	1553
OrBTB1.4	Myb-binding site	195	189
OrBTB1.4	ABRE	1325	1320
OrBTB1.4	ABRE	1404	1395
OrBTB1.4	ARE	279	273
OrBTB1.4	ARE	1047	1041
OrBTB1.4	ARE	1112	1106
OrBTB1.4	ARE	1362	1356
OrBTB1.4	ARE	1424	1418
OrBTB1.4	ARE	1506	1500
OrBTB1.4	TGACG-motif	1327	1322
OrBTB1.4	MBS	815	809
OrBTB1.4	JERE	987	979
OrBTB1.4	O2-site	435	426
OrBTB1.4	O2-site	1324	1315
OrBTB1.5	circadian	1718	1709
OrBTB1.5	MBS	1158	1152
OrBTB1.5	G-Box	1536	1530
OrBTB1.5	Myb-binding site	121	115
OrBTB1.5	ABRE	1536	1530
OrBTB1.5	CTAG-motif	1470	1461
OrBTB1.5	Myc	728	721
OrBTB1.5	Box 4	1012	1006
OrBTB1.5	Box 4	1136	1130
OrBTB1.5	Box 4	1955	1949
OrBTB1.5	ABRE4	1376	1370
OrBTB1.5	TCA-element	1846	1837
OrBTB1.5	Myb	1158	1152
OrBTB1.5	WRE3	1771	1765
OrBTB1.5	box S	518	511
OrBTB1.5	G-box	1536	1530
OrBTB1.5	CGTCA-motif	1585	1580
OrBTB1.5	CGTCA-motif	1888	1883
OrBTB1.5	Sp1	10	4
OrBTB1.5	3-AF1 binding site	351	341
OrBTB1.5	ERE	974	966
OrBTB1.5	MYB	121	115
OrBTB1.5	MYB	504	498
OrBTB1.5	MYB	1148	1142
OrBTB2.1	as-1	217	212
OrBTB2.1	as-1	1565	1560
OrBTB2.1	Sp1	300	294
OrBTB2.1	WUN-motif	229	220
OrBTB2.1	Gap-box	1349	1340
OrBTB2.1	TC-rich repeats	514	505
OrBTB2.1	CCGTCC-box	332	326
OrBTB2.1	A-box	332	326
OrBTB2.1	G-box	277	271
OrBTB2.1	G-box	1646	1640
OrBTB2.1	CGTCA-motif	1608	1603
OrBTB2.1	LAMP-element	551	542
OrBTB2.1	chs-CMA2a	679	671
OrBTB2.1	Box 4	1558	1552
OrBTB2.1	Box 4	1759	1753
OrBTB2.1	RY-element	1691	1683
OrBTB2.1	GA-motif	1672	1664
OrBTB2.1	ABRE	215	210
OrBTB2.1	ABRE	277	272
OrBTB2.1	ABRE	1646	1641
OrBTB2.1	I-box	360	350
OrBTB2.1	I-box	1594	1585
OrBTB2.1	STRE	798	793
OrBTB2.1	STRE	1385	1380
OrBTB2.1	STRE	1973	1968
OrBTB2.1	W box	768	762
OrBTB2.1	TGACG-motif	217	212
OrBTB2.1	TGACG-motif	1565	1560
OrBTB2.1	AP-1	36	28
OrBTB2.1	MRE	1207	1200
OrBTB2.1	O2-site	1159	1150
OrBTB2.1	O2-site	1592	1583
OrBTB2.1	ABRE3a	277	271
OrBTB2.1	ABRE3a	1646	1640
OrBTB2.1	CCGTCC motif	332	326
OrBTB2.2	G-box	1427	1418
OrBTB2.2	CGTCA-motif	1104	1099
OrBTB2.2	CGTCA-motif	1252	1247
OrBTB2.2	as-1	925	920
OrBTB2.2	as-1	1107	1102
OrBTB2.2	as-1	1302	1297
OrBTB2.2	as-1	1804	1799
OrBTB2.2	MYC	1445	1439
OrBTB2.2	MYC	1639	1633
OrBTB2.2	MYC	1994	1988
OrBTB2.2	TGA-element	1060	1054
OrBTB2.2	TGA-element	1123	1117
OrBTB2.2	TGACG-motif	925	920
OrBTB2.2	TGACG-motif	1107	1102
OrBTB2.2	TGACG-motif	1302	1297
OrBTB2.2	TGACG-motif	1804	1799
OrBTB2.2	ARE	73	67
OrBTB2.2	AAGAA-motif	1491	1484
OrBTB2.3	AAGAA-motif	1565	1558
OrBTB2.3	Myb-binding site	1730	1724
OrBTB2.3	I-box	239	230
OrBTB2.3	Myb	207	201
OrBTB2.3	CAT-box	532	526
OrBTB2.3	STRE	311	306
OrBTB2.3	STRE	923	918
OrBTB2.3	STRE	1404	1399
OrBTB2.3	W box	491	485
OrBTB2.3	AE-box	1158	1150
OrBTB2.3	TGACG-motif	317	312
OrBTB2.3	TGACG-motif	520	515
OrBTB2.3	TGACG-motif	1115	1110
OrBTB2.3	AACA_motif	1926	1915
OrBTB2.3	as-1	317	312
OrBTB2.3	as-1	520	515
OrBTB2.3	as-1	1115	1110
OrBTB2.3	MYC	835	829
OrBTB2.3	MYC	1018	1012
OrBTB2.3	MYC	1277	1271
OrBTB2.3	MYC	1286	1280
OrBTB2.3	MYB	1730	1724
OrBTB2.3	chs-CMA1a	384	376
OrBTB2.3	LTR	1789	1783
OrBTB2.3	CGTCA-motif	331	326
OrBTB2.3	GCN4_motif	1281	1274
OrBTB2.4	G-box	1085	1079
OrBTB2.4	GC-motif	1018	1012
OrBTB2.4	TCT-motif	220	214
OrBTB2.4	MYC	642	636
OrBTB2.4	MYC	682	676
OrBTB2.4	WUN-motif	1338	1329
OrBTB2.4	WUN-motif	1700	1691
OrBTB2.4	3-AF1 binding site	1291	1281
OrBTB2.4	ABRE3a	1085	1079
OrBTB2.4	O2-site	1084	1075
OrBTB2.4	G-Box	825	819
OrBTB2.4	STRE	116	111
OrBTB2.4	STRE	549	544
OrBTB2.4	STRE	1242	1237
OrBTB2.4	STRE	1269	1264
OrBTB2.4	STRE	1287	1282
OrBTB2.4	Myb	254	248
OrBTB2.4	ABRE	1085	1080
OrBTB2.5	TGACG-motif	768	763
OrBTB2.5	TGACG-motif	785	780
OrBTB2.5	TGACG-motif	1846	1841
OrBTB2.5	MYB recognition site	1554	1548
OrBTB2.5	MYB recognition site	1623	1617
OrBTB2.5	ACE	820	811
OrBTB2.5	CCGTCC motif	651	645
OrBTB2.5	Myc	1858	1851
OrBTB2.5	AE-box	889	881
OrBTB2.5	I-box	1778	1769
OrBTB2.5	CARE	393	385
OrBTB2.5	A-box	651	645
OrBTB2.5	CCGTCC-box	651	645
OrBTB2.5	GCN4_motif	678	671
OrBTB2.5	G-box	1693	1687
OrBTB2.5	CGTCA-motif	383	378
OrBTB2.5	CGTCA-motif	808	803
OrBTB2.5	CGTCA-motif	833	828
OrBTB2.5	Gap-box	100	91
OrBTB2.5	Gap-box	263	254
OrBTB2.5	MYC	22	16
OrBTB2.5	MYC	184	178
OrBTB2.5	MYC	452	446
OrBTB2.5	MYC	771	765
OrBTB2.5	MYC	1505	1499
OrBTB2.5	as-1	768	763
OrBTB2.5	as-1	785	780
OrBTB2.5	as-1	1846	1841
OrBTB2.6	GT1-motif	626	620
OrBTB2.6	MYB recognition site	211	205
OrBTB2.6	MYB recognition site	576	570
OrBTB2.6	MYB recognition site	1804	1798
OrBTB2.6	TGACG-motif	449	444
OrBTB2.6	G-Box	1540	1534
OrBTB2.6	MBS	963	957
OrBTB2.6	ABRE4	1883	1877
OrBTB2.6	STRE	1260	1255
OrBTB2.6	W box	87	81
OrBTB2.6	W box	1275	1269
OrBTB2.6	Myb	963	957
OrBTB2.6	Myb	1404	1398
OrBTB2.6	ABRE	177	168
OrBTB2.6	ABRE	447	442
OrBTB2.6	ABRE	1540	1534
OrBTB2.6	Box 4	1183	1177
OrBTB2.6	Box 4	1693	1687
OrBTB2.6	G-box	541	535
OrBTB2.6	G-box	693	684
OrBTB2.6	G-box	1540	1534
OrBTB2.6	CGTCA-motif	540	535
OrBTB2.6	CGTCA-motif	1177	1172
OrBTB2.6	TCT-motif	968	962
OrBTB2.6	TGA-element	1581	1575
OrBTB2.6	MYC	1165	1159
OrBTB2.6	MYC	1910	1904
OrBTB2.6	ERE	1227	1219
OrBTB2.6	ERE	1736	1728
OrBTB2.6	as-1	449	444
OrBTB2.7	MYC	1098	1092
OrBTB2.7	MYC	1129	1123
OrBTB2.7	MYC	1199	1193
OrBTB2.7	MYC	1752	1746
OrBTB2.7	MYC	1815	1809
OrBTB2.7	as-1	276	271
OrBTB2.7	MYB-like sequence	826	820
OrBTB2.7	MYB	536	530
OrBTB2.7	MYB	826	820
OrBTB2.7	DRE core	75	69
OrBTB2.7	G-box	579	573
OrBTB2.7	P-box	1002	995
OrBTB2.7	STRE	1612	1607
OrBTB2.7	STRE	1910	1905
OrBTB2.7	STRE	1929	1924
OrBTB2.7	AE-box	548	540
OrBTB2.7	I-box	358	349
OrBTB2.7	Myb	295	289
OrBTB2.7	Myb	1555	1549
OrBTB2.7	TCA-element	1173	1164
OrBTB2.7	MRE	1623	1616
OrBTB2.7	TGACG-motif	276	271
OrBTB2.7	MBS	295	289
OrBTB2.7	MBS	1555	1549
OrBTB2.7	ARE	19	13
OrBTB2.7	ARE	540	534
OrBTB3.1	TGACG-motif	1418	1413
OrBTB3.1	GT1-motif	41	35
OrBTB3.1	GT1-motif	192	185
OrBTB3.1	GT1-motif	193	187
OrBTB3.1	ARE	758	752
OrBTB3.1	ABRE	1398	1391
OrBTB3.1	ABRE	1409	1402
OrBTB3.1	ABRE	1637	1632
OrBTB3.1	Box 4	1194	1188
OrBTB3.1	STRE	491	486
OrBTB3.1	STRE	501	496
OrBTB3.1	STRE	1723	1718
OrBTB3.1	STRE	1904	1899
OrBTB3.1	STRE	1911	1906
OrBTB3.1	W box	104	98
OrBTB3.1	Myb	1421	1415
OrBTB3.1	I-box	335	326
OrBTB3.1	H-box	1490	1481
OrBTB3.1	GTGGC-motif	869	859
OrBTB3.1	AT-rich element	1038	1028
OrBTB3.1	CGTCA-motif	187	182
OrBTB3.1	Sp1	1810	1804
OrBTB3.1	MYC	871	865
OrBTB3.1	MYC	969	963
OrBTB3.1	as-1	1418	1413
OrBTB3.1	MYB	847	841
OrBTB3.2	ABRE4	1762	1756
OrBTB3.2	STRE	522	517
OrBTB3.2	Myc	624	617
OrBTB3.2	Box 4	1323	1317
OrBTB3.2	AAGAA-motif	1268	1261
OrBTB3.2	ARE	803	797
OrBTB3.2	G-Box	1424	1418
OrBTB3.2	TC-rich repeats	1504	1495
OrBTB3.2	GATA-motif	1087	1080
OrBTB3.2	Sp1	1693	1687
OrBTB3.2	Sp1	1711	1705
OrBTB3.2	Sp1	1746	1740
OrBTB3.2	Sp1	1811	1805
OrBTB3.2	Sp1	1872	1866
OrBTB3.2	MYC	1212	1206
OrBTB3.2	CGTCA-motif	134	129
OrBTB3.2	CGTCA-motif	1473	1468
OrBTB3.2	CGTCA-motif	1669	1664
OrBTB3.2	G-box	799	793
OrBTB3.2	box S	188	181
OrBTB3.2	WRE3	383	377
OrBTB3.2	WRE3	563	557
OrBTB3.2	TCCC-motif	330	323
OrBTB3.2	GTGGC-motif	199	189
OrBTB3.3	CCGTCC motif	651	645
OrBTB3.3	ARE	736	730
OrBTB3.3	GT1-motif	468	462
OrBTB3.3	W box	331	325
OrBTB3.3	STRE	1108	1103
OrBTB3.3	ABRE4	1177	1171
OrBTB3.3	RY-element	1292	1284
OrBTB3.3	RY-element	1420	1412
OrBTB3.3	Box 4	1554	1548
OrBTB3.3	P-box	1684	1677
OrBTB3.3	CGTCA-motif	356	351
OrBTB3.3	CCGTCC-box	651	645
OrBTB3.3	A-box	651	645
OrBTB3.3	TGA-element	1389	1383
OrBTB3.3	TGA-element	1971	1965
OrBTB3.3	TCA	1666	1657
OrBTB3.3	GATA-motif	1737	1727
OrBTB3.3	ERE	179	171
OrBTB3.3	ERE	533	525
OrBTB3.3	ERE	1164	1156
OrBTB3.3	ERE	1706	1698
OrBTB3.3	MYC	721	715
OrBTB3.3	MYC	841	835
OrBTB3.3	MYC	1809	1803
OrBTB3.3	WUN-motif	1942	1933
OrBTB3.4	MYC	338	332
OrBTB3.4	ERE	1335	1327
OrBTB3.4	ERE	1974	1966
OrBTB3.4	MYB	1517	1511
OrBTB3.4	MYB	1817	1811
OrBTB3.4	TCA	700	691
OrBTB3.4	LTR	259	253
OrBTB3.4	LTR	1754	1748
OrBTB3.4	chs-CMA1a	615	607
OrBTB3.4	CGTCA-motif	1990	1985
OrBTB3.4	P-box	776	769
OrBTB3.4	P-box	927	920
OrBTB3.4	Box 4	1319	1313
OrBTB3.4	Box 4	1669	1663
OrBTB3.4	W box	1230	1224
OrBTB3.4	ABRE4	1628	1622
OrBTB3.4	TCA-element	1222	1213
OrBTB3.4	ARE	1783	1777
OrBTB3.4	ARE	1827	1821
OrBTB3.4	GARE-motif	801	794
OrBTB3.5	P-box	1243	1236
OrBTB3.5	ABRE	700	695
OrBTB3.5	ABRE	1124	1118
OrBTB3.5	Box 4	1235	1229
OrBTB3.5	Box 4	1315	1309
OrBTB3.5	STRE	51	46
OrBTB3.5	STRE	1000	995
OrBTB3.5	TCA-element	769	760
OrBTB3.5	TGACG-motif	702	697
OrBTB3.5	G-Box	650	644
OrBTB3.5	G-Box	1124	1118
OrBTB3.5	AC-II	655	644
OrBTB3.5	ARE	1128	1122
OrBTB3.5	ARE	1947	1941
OrBTB3.5	Sp1	1370	1364
OrBTB3.5	MYC	1703	1697
OrBTB3.5	F-box	1717	1707
OrBTB3.5	as-1	702	697
OrBTB3.5	TCT-motif	1727	1721
OrBTB3.5	GC-motif	707	701
OrBTB3.5	MYB	1494	1488
OrBTB3.5	WRE3	857	851
OrBTB3.5	WRE3	918	912
OrBTB3.5	WRE3	1461	1455
OrBTB3.5	DRE core	720	714
OrBTB3.5	CGTCA-motif	687	682
OrBTB3.5	CGTCA-motif	713	708
OrBTB3.5	G-box	963	957
OrBTB3.5	G-box	1124	1118
OrBTB3.6	JERE	740	732
OrBTB3.6	G-Box	250	244
OrBTB3.6	CCGTCC motif	542	536
OrBTB3.6	CCGTCC motif	546	540
OrBTB3.6	Myb-binding site	467	461
OrBTB3.6	AAGAA-motif	296	287
OrBTB3.6	AAGAA-motif	1143	1136
OrBTB3.6	STRE	401	396
OrBTB3.6	STRE	1987	1982
OrBTB3.6	CARE	1401	1393
OrBTB3.6	LTR	1306	1300
OrBTB3.6	LTR	1613	1607
OrBTB3.6	A-box	542	536
OrBTB3.6	A-box	546	540
OrBTB3.6	CCGTCC-box	542	536
OrBTB3.6	CCGTCC-box	546	540
OrBTB3.6	DRE core	681	675
OrBTB3.6	WRE3	523	517
OrBTB3.6	WRE3	721	715
OrBTB3.6	WRE3	891	885
OrBTB3.6	CGTCA-motif	443	438
OrBTB3.6	CGTCA-motif	584	579
OrBTB3.6	CGTCA-motif	1542	1537
OrBTB3.6	MYC	1059	1053
OrBTB3.6	Sp1	398	392
OrBTB3.6	MYB-like sequence	880	874
OrBTB3.6	MYB	467	461
OrBTB3.6	MYB	880	874
OrBTB3.7	TGA-element	1498	1492
OrBTB3.7	MYB	1334	1328
OrBTB3.7	Sp1	956	950
OrBTB3.7	Sp1	996	990
OrBTB3.7	Sp1	1006	1000
OrBTB3.7	Sp1	1161	1155
OrBTB3.7	Sp1	1206	1200
OrBTB3.7	Sp1	1583	1577
OrBTB3.7	Sp1	1605	1599
OrBTB3.7	WRE3	695	689
OrBTB3.7	CCGTCC-box	726	720
OrBTB3.7	A-box	726	720
OrBTB3.7	Myb-binding site	1334	1328
OrBTB3.7	ABRE	22	17
OrBTB3.7	ABRE	187	178
OrBTB3.7	ABRE	333	328
OrBTB3.7	ABRE	1743	1738
OrBTB3.7	GT1-motif	655	646
OrBTB3.7	ARE	1821	1815
OrBTB3.7	MYB recognition site	884	878
OrBTB3.7	MYB recognition site	1121	1115
OrBTB3.7	GC-motif	1864	1858
OrBTB3.7	MYC	620	614
OrBTB3.7	MYC	853	847
OrBTB3.7	MYC	1990	1984
OrBTB3.7	CGTCA-motif	1428	1423
OrBTB3.7	CGTCA-motif	1981	1976
OrBTB3.7	G-box	773	767
OrBTB3.7	G-box	1020	1014
OrBTB3.7	G-box	1097	1091
OrBTB3.7	G-box	1103	1097
OrBTB3.7	G-box	1743	1737
OrBTB3.7	DRE core	98	92
OrBTB3.7	DRE core	742	736
OrBTB3.7	LTR	1825	1819
OrBTB3.7	STRE	466	461
OrBTB3.7	STRE	632	627
OrBTB3.7	ABRE4	255	249
OrBTB3.7	ABRE4	557	551
OrBTB3.7	ABRE3a	1743	1737
OrBTB3.7	CCGTCC motif	726	720
OrBTB3.7	G-Box	1927	1921
OrBTB4.1	LTR	429	423
OrBTB4.1	A-box	490	484
OrBTB4.1	CCGTCC-box	490	484
OrBTB4.1	NON	840	830
OrBTB4.1	DRE core	169	163
OrBTB4.1	DRE core	1084	1078
OrBTB4.1	WRE3	996	990
OrBTB4.1	box S	1204	1197
OrBTB4.1	G-box	1072	1066
OrBTB4.1	CGTCA-motif	1	-4
OrBTB4.1	CGTCA-motif	552	547
OrBTB4.1	Sp1	615	609
OrBTB4.1	Sp1	750	744
OrBTB4.1	MYC	268	262
OrBTB4.1	plant_AP-2-like	1064	1056
OrBTB4.1	GC-motif	1117	1108
OrBTB4.1	NON-box	945	936
OrBTB4.1	O2-site	279	269
OrBTB4.1	G-Box	1955	1949
OrBTB4.1	ARE	1584	1578
OrBTB4.1	CCGTCC motif	490	484
OrBTB4.1	AAGAA-motif	1947	1940
OrBTB4.1	ABRE	415	410
OrBTB4.1	Box 4	1674	1668
OrBTB4.1	STRE	210	205
OrBTB4.1	STRE	313	308
OrBTB4.1	STRE	829	824
OrBTB4.1	MSA-like	842	834
OrBTB4.1	Box II -like sequence	1959	1949
OrBTB4.1	TCA-element	1909	1900
OrBTB4.2	box S	143	136
OrBTB4.2	DRE core	23	17
OrBTB4.2	G-box	11	5
OrBTB4.2	CGTCA-motif	1726	1721
OrBTB4.2	TCCC-motif	1984	1977
OrBTB4.2	GC-motif	56	47
OrBTB4.2	MYB	1429	1423
OrBTB4.2	plant_AP-2-like	3	-5
OrBTB4.2	MYB-like sequence	1429	1423
OrBTB4.2	ARE	523	517
OrBTB4.2	O2-site	1003	994
OrBTB4.2	O2-site	1097	1088
OrBTB4.2	G-Box	894	888
OrBTB4.2	STRE	1907	1902
OrBTB4.2	Box II -like sequence	898	888
OrBTB4.2	TCA-element	848	839
OrBTB4.2	I-box	1098	1089
OrBTB4.2	AAGAA-motif	886	879
OrBTB4.2	ABRE	1632	1627
OrBTB4.3	MYB-like sequence	945	939
OrBTB4.3	GATA-motif	1736	1725
OrBTB4.3	MYC	434	428
OrBTB4.3	MYC	1016	1010
OrBTB4.3	ATCT-motif	606	597
OrBTB4.3	ATCT-motif	1894	1885
OrBTB4.3	MYB	945	939
OrBTB4.3	TCT-motif	1885	1879
OrBTB4.3	chs-CMA1a	1411	1403
OrBTB4.3	Box 4	1208	1202
OrBTB4.3	Box 4	1219	1213
OrBTB4.3	Box 4	1365	1359
OrBTB4.3	Box 4	1478	1472
OrBTB4.3	Box 4	1499	1493
OrBTB4.3	Box 4	1767	1761
OrBTB4.3	Box 4	1814	1808
OrBTB4.3	Myc	1251	1244
OrBTB4.3	TCA-element	1055	1046
OrBTB4.3	Myb	406	400
OrBTB4.3	Myb	1100	1094
OrBTB4.3	ABRE4	1675	1669
OrBTB4.3	HD-Zip 3	1771	1762
OrBTB4.3	STRE	1317	1312
OrBTB4.3	MBS	406	400
OrBTB4.3	MBS	1100	1094
OrBTB4.3	ARE	157	151
OrBTB4.4	MYC	101	95
OrBTB4.4	MYC	1240	1234
OrBTB4.4	CGTCA-motif	1258	1253
OrBTB4.4	CGTCA-motif	1588	1583
OrBTB4.4	CGTCA-motif	1777	1772
OrBTB4.4	CGTCA-motif	1793	1788
OrBTB4.4	G-box	12	6
OrBTB4.4	G-box	361	355
OrBTB4.4	G-box	923	917
OrBTB4.4	G-box	1259	1253
OrBTB4.4	AE-box	1117	1109
OrBTB4.4	ABRE4	1984	1978
OrBTB4.4	STRE	256	251
OrBTB4.4	I-box	1215	1206
OrBTB4.4	I-box	1873	1863
OrBTB4.4	ACE	1982	1973
OrBTB4.4	ABRE3a	12	6
OrBTB4.4	ABRE3a	923	917
OrBTB4.4	G-Box	982	976
OrBTB4.4	G-Box	1895	1889
OrBTB4.4	TGACG-motif	692	687
OrBTB4.4	TGACG-motif	720	715
OrBTB4.4	TGACG-motif	1342	1337
OrBTB4.4	MYB	1671	1665
OrBTB4.4	Sp1	1308	1302
OrBTB4.4	GATA-motif	2	-5
OrBTB4.4	3-AF1 binding site	1628	1618
OrBTB4.4	as-1	692	687
OrBTB4.4	as-1	720	715
OrBTB4.4	as-1	1342	1337
OrBTB4.4	GCN4_motif	1551	1544
OrBTB4.4	ABRE	12	7
OrBTB4.4	ABRE	141	132
OrBTB4.4	ABRE	165	156
OrBTB4.4	ABRE	923	918
OrBTB4.4	AC-I	1762	1751
OrBTB4.4	ARE	1417	1411
OrBTB4.4	GT1-motif	1074	1067
OrBTB4.4	GT1-motif	1075	1069
OrBTB4.5	I-box	417	408
OrBTB4.5	I-box	771	762
OrBTB4.5	ABRE2	1420	1412
OrBTB4.5	CAT-box	1244	1238
OrBTB4.5	STRE	92	87
OrBTB4.5	ABRE4	1452	1446
OrBTB4.5	Box 4	1897	1891
OrBTB4.5	CCGTCC motif	1231	1225
OrBTB4.5	CCGTCC motif	1652	1646
OrBTB4.5	G-Box	1421	1415
OrBTB4.5	G-Box	1703	1697
OrBTB4.5	TGACG-motif	857	852
OrBTB4.5	TGACG-motif	1774	1769
OrBTB4.5	E2Fb	266	258
OrBTB4.5	G-box	1419	1410
OrBTB4.5	G-box	1421	1415
OrBTB4.5	DRE core	1039	1033
OrBTB4.5	DRE core	1337	1331
OrBTB4.5	ABRE	402	397
OrBTB4.5	ABRE	1421	1415
OrBTB4.5	MYB recognition site	1159	1153
OrBTB4.5	GT1-motif	463	457
OrBTB4.5	GT1-motif	775	769
OrBTB4.5	ATCT-motif	672	663
OrBTB4.5	F-box	1915	1905
OrBTB4.5	3-AF1 binding site	1555	1545
OrBTB4.5	GATA-motif	419	410
OrBTB4.5	as-1	857	852
OrBTB4.5	as-1	1774	1769
OrBTB4.5	Sp1	1967	1961
OrBTB4.5	GCN4_motif	6	-1
OrBTB4.5	GCN4_motif	1631	1624
OrBTB4.5	CCGTCC-box	1231	1225
OrBTB4.5	CCGTCC-box	1652	1646
OrBTB4.5	A-box	1231	1225
OrBTB4.5	A-box	1652	1646
OrBTB4.6	TCCC-motif	413	406
OrBTB4.6	CGTCA-motif	618	613
OrBTB4.6	CGTCA-motif	1037	1032
OrBTB4.6	G-box	1101	1093
OrBTB4.6	G-box	1102	1096
OrBTB4.6	MYC	804	798
OrBTB4.6	MYC	1294	1288
OrBTB4.6	GATA-motif	1869	1862
OrBTB4.6	TCT-motif	500	494
OrBTB4.6	TC-rich repeats	500	491
OrBTB4.6	G-Box	606	600
OrBTB4.6	G-Box	1102	1096
OrBTB4.6	G-Box	1447	1441
OrBTB4.6	ARE	732	726
OrBTB4.6	ACE	1611	1602
OrBTB4.6	GT1-motif	1095	1089
OrBTB4.6	GT1-motif	1199	1192
OrBTB4.6	GT1-motif	1200	1194
OrBTB4.6	P-box	470	463
OrBTB4.6	ABRE	1102	1096
OrBTB4.6	AAGAA-motif	41	34
OrBTB4.6	RY-element	1555	1547
OrBTB4.6	Box 4	1195	1189
OrBTB4.6	Box 4	1304	1298
OrBTB4.6	Myc	501	494
OrBTB4.6	ABRE4	1142	1136
OrBTB4.6	ABRE4	1149	1143
OrBTB4.6	CAT-box	1453	1447
OrBTB4.7	G-box	1154	1148
OrBTB4.7	G-box	1193	1187
OrBTB4.7	G-box	1316	1310
OrBTB4.7	DRE core	1304	1298
OrBTB4.7	TGA-element	1286	1280
OrBTB4.7	MYB	530	524
OrBTB4.7	AT~ABRE	1152	1144
OrBTB4.7	ABRE3a	1154	1148
OrBTB4.7	ABRE3a	1316	1310
OrBTB4.7	ARE	186	180
OrBTB4.7	ARE	808	802
OrBTB4.7	DRE1	389	382
OrBTB4.7	GT1-motif	155	149
OrBTB4.7	GT1-motif	1676	1669
OrBTB4.7	GT1-motif	1677	1671
OrBTB4.7	G-Box	1706	1700
OrBTB4.7	G-Box	1727	1721
OrBTB4.7	G-Box	1740	1734
OrBTB4.7	O2-site	1364	1356
OrBTB4.7	TCA-element	502	493
OrBTB4.7	W box	469	463
OrBTB4.7	W box	1053	1047
OrBTB4.7	ABRE4	861	855
OrBTB4.7	ABRE4	976	970
OrBTB4.7	ABRE4	1437	1431
OrBTB4.7	STRE	1181	1176
OrBTB4.7	STRE	1918	1913
OrBTB4.7	Box 4	1585	1579
OrBTB4.7	Box 4	1780	1774
OrBTB4.7	RY-element	1878	1870
OrBTB4.7	ABRE	1152	1143
OrBTB4.7	ABRE	1154	1149
OrBTB4.7	ABRE	1316	1311
OrBTB4.7	ABRE	1434	1424
OrBTB4.7	ABRE	1952	1943
OrBTB4.7	Myb-binding site	530	524
OrBTB5.1	GCN4_motif	1131	1124
OrBTB5.1	CGTCA-motif	3	-2
OrBTB5.1	CGTCA-motif	451	446
OrBTB5.1	CGTCA-motif	945	940
OrBTB5.1	CGTCA-motif	1139	1134
OrBTB5.1	CGTCA-motif	1312	1307
OrBTB5.1	CGTCA-motif	1820	1815
OrBTB5.1	G-box	778	772
OrBTB5.1	G-box	1313	1307
OrBTB5.1	MYC	421	415
OrBTB5.1	MYC	766	760
OrBTB5.1	MYC	790	784
OrBTB5.1	MYC	857	851
OrBTB5.1	WUN-motif	58	49
OrBTB5.1	WUN-motif	59	51
OrBTB5.1	as-1	35	30
OrBTB5.1	as-1	179	174
OrBTB5.1	as-1	1025	1020
OrBTB5.1	G-Box	1742	1736
OrBTB5.1	circadian	729	720
OrBTB5.1	TGACG-motif	35	30
OrBTB5.1	TGACG-motif	179	174
OrBTB5.1	TGACG-motif	1025	1020
OrBTB5.1	ARE	1094	1088
OrBTB5.1	MYB recognition site	1223	1217
OrBTB5.1	GT1-motif	888	881
OrBTB5.1	GT1-motif	889	883
OrBTB5.1	GT1-motif	1509	1503
OrBTB5.1	ABRE	98	93
OrBTB5.1	STRE	1180	1175
OrBTB5.2	TGACG-motif	618	613
OrBTB5.2	TGACG-motif	628	623
OrBTB5.2	TGACG-motif	852	847
OrBTB5.2	CCGTCC motif	14	8
OrBTB5.2	AAGAA-motif	1168	1161
OrBTB5.2	AAGAA-motif	1958	1951
OrBTB5.2	Box 4	1137	1131
OrBTB5.2	Box 4	1244	1238
OrBTB5.2	Box 4	1277	1271
OrBTB5.2	Box 4	1432	1426
OrBTB5.2	Box 4	1585	1579
OrBTB5.2	Box 4	1799	1793
OrBTB5.2	Box 4	1916	1910
OrBTB5.2	MSA-like	186	178
OrBTB5.2	STRE	490	485
OrBTB5.2	STRE	775	770
OrBTB5.2	Myb	1499	1493
OrBTB5.2	A-box	14	8
OrBTB5.2	CCGTCC-box	14	8
OrBTB5.2	CGTCA-motif	219	214
OrBTB5.2	ERE	1057	1049
OrBTB5.2	as-1	618	613
OrBTB5.2	as-1	628	623
OrBTB5.2	as-1	852	847
OrBTB5.2	MYB	587	581
OrBTB5.2	TGA-element	248	242
OrBTB5.3	GC-motif	1244	1238
OrBTB5.3	MYB	122	116
OrBTB5.3	MYB	796	790
OrBTB5.3	MYB	1757	1751
OrBTB5.3	MYC	370	364
OrBTB5.3	MYC	1914	1908
OrBTB5.3	Gap-box	1795	1785
OrBTB5.3	as-1	446	441
OrBTB5.3	AT-rich element	1867	1857
OrBTB5.3	CGTCA-motif	1284	1279
OrBTB5.3	TCCC-motif	573	566
OrBTB5.3	GTGGC-motif	382	372
OrBTB5.3	chs-Unit 1 m1	1346	1336
OrBTB5.3	STRE	72	67
OrBTB5.3	STRE	1471	1466
OrBTB5.3	STRE	1659	1654
OrBTB5.3	Myb-binding site	796	790
OrBTB5.3	Box 4	1018	1012
OrBTB5.3	Box 4	1532	1526
OrBTB5.3	Box 4	1775	1769
OrBTB5.3	GA-motif	1412	1404
OrBTB5.3	ARE	107	101
OrBTB5.3	ARE	1012	1006
OrBTB5.3	MRE	1351	1344
OrBTB5.3	TGACG-motif	446	441
OrBTB5.4	TCCC-motif	1761	1754
OrBTB5.4	AT-rich element	317	307
OrBTB5.4	DRE core	759	753
OrBTB5.4	G-box	492	486
OrBTB5.4	G-box	1062	1056
OrBTB5.4	CGTCA-motif	1061	1056
OrBTB5.4	CGTCA-motif	1944	1939
OrBTB5.4	Gap-box	245	235
OrBTB5.4	MYC	364	358
OrBTB5.4	as-1	622	617
OrBTB5.4	MYB	207	201
OrBTB5.4	MYB	1093	1087
OrBTB5.4	TGA-element	1821	1815
OrBTB5.4	TGACG-motif	622	617
OrBTB5.4	ARE	1191	1185
OrBTB5.4	ABRE	936	927
OrBTB5.4	Box 4	1536	1530
OrBTB5.4	STRE	109	104
OrBTB5.4	CAT-box	520	514
OrBTB5.4	CAT-box	1073	1067
OrBTB6.1	STRE	1599	1594
OrBTB6.1	Myb	413	407
OrBTB6.1	CAT-box	1414	1408
OrBTB6.1	ABRE	151	146
OrBTB6.1	Box 4	1858	1852
OrBTB6.1	ARE	287	281
OrBTB6.1	GARE-motif	1962	1955
OrBTB6.1	O2-site	1457	1448
OrBTB6.1	MBS	413	407
OrBTB6.1	MYB	624	618
OrBTB6.1	MYB	1409	1403
OrBTB6.1	WUN-motif	1782	1773
OrBTB6.1	MYC	29	23
OrBTB6.1	MYC	1530	1524
OrBTB6.1	MYC	1756	1750
OrBTB6.1	MYC	1801	1795
OrBTB6.1	MYB-like sequence	1409	1403
OrBTB6.1	WRE3	312	306
OrBTB6.1	CGTCA-motif	78	73
OrBTB6.1	AT-rich sequence	1109	1100
OrBTB6.2	ABRE	1608	1602
OrBTB6.2	Myb-binding site	842	836
OrBTB6.2	AAGAA-motif	1602	1595
OrBTB6.2	CAT-box	898	892
OrBTB6.2	W box	9	3
OrBTB6.2	STRE	759	754
OrBTB6.2	STRE	1226	1221
OrBTB6.2	STRE	1842	1837
OrBTB6.2	G-Box	774	768
OrBTB6.2	G-Box	1605	1596
OrBTB6.2	G-Box	1608	1602
OrBTB6.2	TGACG-motif	575	570
OrBTB6.2	TGACG-motif	1453	1448
OrBTB6.2	MYB recognition site	1317	1311
OrBTB6.2	GT1-motif	1817	1811
OrBTB6.2	GATA-motif	719	712
OrBTB6.2	as-1	575	570
OrBTB6.2	as-1	1453	1448
OrBTB6.2	MYC	689	683
OrBTB6.2	MYB	842	836
OrBTB6.2	G-box	1608	1602
OrBTB6.3	Box 4	1423	1417
OrBTB6.3	Myb-binding site	1095	1089
OrBTB6.3	AAGAA-motif	28	21
OrBTB6.3	W box	1225	1219
OrBTB6.3	STRE	147	142
OrBTB6.3	G-Box	114	108
OrBTB6.3	TGACG-motif	1659	1654
OrBTB6.3	O2-site	1577	1568
OrBTB6.3	MYB-like sequence	506	500
OrBTB6.3	as-1	1659	1654
OrBTB6.3	MYC	1115	1109
OrBTB6.3	MYC	1781	1775
OrBTB6.3	TC-rich repeats	486	477
OrBTB6.3	MYB	506	500
OrBTB6.3	MYB	585	579
OrBTB6.3	MYB	841	835
OrBTB6.3	MYB	1095	1089
OrBTB6.3	TCT-motif	486	480
OrBTB6.3	TCCC-motif	1993	1986
OrBTB6.3	CGTCA-motif	933	928
OrBTB6.3	box S	1544	1537
OrBTB6.4	G-box	708	702
OrBTB6.4	CGTCA-motif	490	485
OrBTB6.4	CGTCA-motif	1806	1801
OrBTB6.4	WRE3	1630	1624
OrBTB6.4	ERE	1099	1091
OrBTB6.4	as-1	1605	1600
OrBTB6.4	TGA-element	652	646
OrBTB6.4	TCA	1738	1729
OrBTB6.4	MYB	1487	1481
OrBTB6.4	ATCT-motif	311	302
OrBTB6.4	TCT-motif	1029	1023
OrBTB6.4	MBS	1023	1017
OrBTB6.4	TGACG-motif	1605	1600
OrBTB6.4	ABRE3a	708	702
OrBTB6.4	ARE	568	562
OrBTB6.4	ARE	718	712
OrBTB6.4	GT1-motif	1018	1012
OrBTB6.4	Box 4	1105	1099
OrBTB6.4	Box 4	1162	1156
OrBTB6.4	Box 4	1197	1191
OrBTB6.4	ABRE	603	596
OrBTB6.4	ABRE	706	696
OrBTB6.4	ABRE	708	703
OrBTB6.4	Myb-binding site	1487	1481
OrBTB6.4	Myb	1023	1017
OrBTB6.4	STRE	1323	1318
OrBTB6.4	STRE	1594	1589
OrBTB6.4	STRE	1658	1653
OrBTB6.4	ABRE4	610	604
OrBTB6.4	ABRE4	1232	1226
OrBTB6.5	G-Box	1684	1678
OrBTB6.5	GARE-motif	1311	1304
OrBTB6.5	ABRE3a	829	823
OrBTB6.5	ABRE3a	1888	1882
OrBTB6.5	ABRE	829	824
OrBTB6.5	ABRE	1684	1678
OrBTB6.5	ABRE	1888	1883
OrBTB6.5	AAGAA-motif	1906	1899
OrBTB6.5	HD-Zip 3	1588	1578
OrBTB6.5	STRE	293	288
OrBTB6.5	Myb	536	530
OrBTB6.5	CAT-box	1600	1594
OrBTB6.5	CAT-box	1983	1977
OrBTB6.5	LTR	195	189
OrBTB6.5	DRE core	726	720
OrBTB6.5	G-box	694	688
OrBTB6.5	G-box	712	706
OrBTB6.5	G-box	829	823
OrBTB6.5	G-box	1684	1678
OrBTB6.5	G-box	1888	1882
OrBTB6.5	CGTCA-motif	711	706
OrBTB6.5	MYC	189	183
OrBTB6.5	MYC	1483	1477
OrBTB6.5	ATCT-motif	1119	1110
OrBTB6.6	O2-site	1020	1011
OrBTB6.6	O2-site	1191	1182
OrBTB6.6	MYB recognition site	398	392
OrBTB6.6	MYB recognition site	612	606
OrBTB6.6	AAGAA-motif	275	268
OrBTB6.6	ABRE	1021	1016
OrBTB6.6	ABRE	1192	1187
OrBTB6.6	ABRE	1583	1574
OrBTB6.6	ABRE	1828	1823
OrBTB6.6	A-box	1360	1354
OrBTB6.6	A-box	1652	1646
OrBTB6.6	CCGTCC-box	1360	1354
OrBTB6.6	CCGTCC-box	1652	1646
OrBTB6.6	as-1	1023	1018
OrBTB6.6	as-1	1949	1944
OrBTB6.6	TCA	857	848
OrBTB6.6	TCA	904	895
OrBTB6.6	OCT	1807	1799
OrBTB6.6	TGACG-motif	1023	1018
OrBTB6.6	TGACG-motif	1949	1944
OrBTB6.6	G-Box	1351	1345
OrBTB6.6	MBS	392	386
OrBTB6.6	ABRE3a	1828	1822
OrBTB6.6	GARE-motif	1477	1470
OrBTB6.6	CCGTCC motif	1360	1354
OrBTB6.6	CCGTCC motif	1652	1646
OrBTB6.6	Box 4	1251	1245
OrBTB6.6	ABRE4	1759	1753
OrBTB6.6	TCA-element	735	726
OrBTB6.6	Myb	392	386
OrBTB6.6	CAT-box	761	755
OrBTB6.6	CARE	656	648
OrBTB6.6	G-box	1828	1822
OrBTB6.6	G-box	1835	1829
OrBTB6.6	MYC	628	622
OrBTB6.6	ERE	296	288
OrBTB6.7	STRE	431	426
OrBTB6.7	STRE	1176	1171
OrBTB6.7	LTR	844	838
OrBTB6.7	LTR	1007	1001
OrBTB6.7	Box 4	1023	1017
OrBTB6.7	Box 4	1763	1757
OrBTB6.7	ARE	839	833
OrBTB6.7	ARE	1056	1050
OrBTB6.7	ARE	1068	1062
OrBTB6.7	ARE	1548	1542
OrBTB6.7	ARE	1720	1714
OrBTB6.7	ARE	1869	1863
OrBTB6.7	ABRE3a	696	690
OrBTB6.7	ABRE3a	748	742
OrBTB6.7	G-box	696	690
OrBTB6.7	G-box	748	742
OrBTB6.7	G-box	756	746
OrBTB6.7	G-box	1078	1070
OrBTB6.7	G-box	1106	1100
OrBTB6.7	O2-site	1131	1121
OrBTB6.7	WUN-motif	1505	1496
OrBTB6.7	ATCT-motif	684	675
OrBTB6.7	ABRE	696	691
OrBTB6.7	ABRE	748	743
OrBTB6.7	ABRE	759	754
OrBTB6.7	GT1-motif	1061	1055
OrBTB6.7	TCCC-motif	371	364
OrBTB6.7	TCCC-motif	409	402
OrBTB6.7	TCCC-motif	566	559
OrBTB6.7	I-box	796	788
OrBTB6.7	WRE3	611	605
OrBTB6.7	ABRE4	1079	1073
OrBTB6.7	Sp1	428	422
OrBTB6.7	Sp1	443	437
OrBTB6.7	MYB	1513	1507
OrBTB6.8	chs-CMA2a	91	83
OrBTB6.8	ABRE3a	1705	1699
OrBTB6.8	TCA-element	1288	1279
OrBTB6.8	TCA-element	1369	1360
OrBTB6.8	G-box	615	606
OrBTB6.8	G-box	1705	1699
OrBTB6.8	Box 4	1460	1454
OrBTB6.8	TGACG-motif	1688	1683
OrBTB6.8	ABRE4	616	610
OrBTB6.8	WRE3	104	98
OrBTB6.8	as-1	1688	1683
OrBTB6.8	Myb	1249	1243
OrBTB6.8	TCT-motif	1466	1460
OrBTB6.8	ACE	1906	1897
OrBTB6.8	ABRE	1703	1694
OrBTB6.8	ABRE	1705	1700
OrBTB6.8	AAGAA-motif	415	408
OrBTB7.1	ABRE4	1476	1470
OrBTB7.1	MYB	383	377
OrBTB7.1	MYB	949	943
OrBTB7.1	MYC	768	762
OrBTB7.1	MYC	1695	1689
OrBTB7.1	CGTCA-motif	557	552
OrBTB7.1	circadian	1242	1233
OrBTB7.1	TGA-element	816	810
OrBTB7.1	GT1-motif	844	838
OrBTB7.1	CAT-box	1232	1226
OrBTB7.1	MYB-like sequence	949	943
OrBTB7.1	ERE	1413	1405
OrBTB7.1	AAGAA-motif	290	283
OrBTB7.1	AAGAA-motif	307	300
OrBTB7.1	AAGAA-motif	311	304
OrBTB7.1	ABRE	1035	1030
OrBTB7.1	DRE core	209	203
OrBTB7.1	DRE core	215	209
OrBTB7.1	TCA-element	39	30
OrBTB7.1	CCGTCC-box	227	221
OrBTB7.1	GC-motif	204	198
OrBTB7.1	GC-motif	223	217
OrBTB7.1	Box 4	1640	1634
OrBTB7.1	Box 4	1651	1645
OrBTB7.1	Box 4	1844	1838
OrBTB7.1	Box 4	1994	1988
OrBTB7.1	MYB recognition site	1103	1097
OrBTB7.1	CCGTCC motif	227	221
OrBTB7.1	AE-box	1379	1371
OrBTB7.1	A-box	227	221
OrBTB7.1	MRE	745	738
OrBTB7.1	STRE	273	268
OrBTB7.1	STRE	625	620
OrBTB7.2	G-box	1119	1113
OrBTB7.2	ABRE3a	1119	1113
OrBTB7.2	DRE1	657	650
OrBTB7.2	STRE	59	54
OrBTB7.2	STRE	142	137
OrBTB7.2	STRE	838	833
OrBTB7.2	MYB	664	658
OrBTB7.2	MYC	11	5
OrBTB7.2	MYC	885	879
OrBTB7.2	WRE3	1599	1593
OrBTB7.2	GT1-motif	1399	1390
OrBTB7.2	TCT-motif	1917	1911
OrBTB7.2	AAGAA-motif	590	581
OrBTB7.2	AAGAA-motif	1152	1145
OrBTB7.2	ABRE	895	890
OrBTB7.2	ABRE	1119	1114
OrBTB7.3	CGTCA-motif	707	702
OrBTB7.3	as-1	599	594
OrBTB7.3	as-1	1733	1728
OrBTB7.3	P-box	1582	1575
OrBTB7.3	box S	207	200
OrBTB7.3	TCCC-motif	1544	1537
OrBTB7.3	MYC	726	720
OrBTB7.3	Sp1	1577	1571
OrBTB7.3	Sp1	1620	1614
OrBTB7.3	Sp1	1751	1745
OrBTB7.3	Sp1	1866	1860
OrBTB7.3	Sp1	1911	1905
OrBTB7.3	ABRE4	492	486
OrBTB7.3	ABRE	1178	1173
OrBTB7.3	ABRE	1966	1961
OrBTB7.3	ABRE	1991	1986
OrBTB7.3	DRE core	1981	1975
OrBTB7.3	GATA-motif	966	959
OrBTB7.3	ERE	1694	1686
OrBTB7.3	GTGGC-motif	1334	1324
OrBTB7.3	Myb	1360	1354
OrBTB7.3	TC-rich repeats	1558	1549
OrBTB7.3	O2-site	313	304
OrBTB7.3	CARE	200	192
OrBTB7.3	G-box	107	101
OrBTB7.3	G-box	923	917
OrBTB7.3	G-box	1011	1005
OrBTB7.3	G-box	1524	1518
OrBTB7.3	MBSI	1023	1011
OrBTB7.3	LTR	77	71
OrBTB7.3	LTR	883	877
OrBTB7.3	STRE	1874	1869
OrBTB7.3	STRE	1919	1914
OrBTB7.3	AC-II	200	189
OrBTB7.3	ARE	1102	1096
OrBTB7.3	TGACG-motif	599	594
OrBTB7.3	TGACG-motif	1733	1728
OrBTB7.4	I-box	501	492
OrBTB7.4	MYC	783	777
OrBTB7.4	MYC	920	914
OrBTB7.4	MYC	1082	1076
OrBTB7.4	MYC	1105	1099
OrBTB7.4	ABRE4	1797	1791
OrBTB7.4	MYB	332	326
OrBTB7.4	ABRE	1126	1120
OrBTB7.4	ABRE	1795	1786
OrBTB7.4	ABRE	1879	1874
OrBTB7.4	Myb-binding site	332	326
OrBTB7.4	GT1-motif	772	766
OrBTB7.4	G-Box	1126	1120
OrBTB7.4	G-Box	1526	1520
OrBTB7.4	GC-motif	1988	1982
OrBTB7.4	G-box	938	927
OrBTB7.4	G-box	939	930
OrBTB7.4	G-box	1123	1112
OrBTB7.4	G-box	1124	1115
OrBTB7.4	G-box	1126	1120
OrBTB7.4	G-box	1879	1871
OrBTB7.4	RY-element	1771	1763
OrBTB7.4	ARE	610	604
OrBTB7.5	STRE	1142	1137
OrBTB7.5	STRE	1767	1762
OrBTB7.5	MRE	905	898
OrBTB7.5	LTR	831	825
OrBTB7.5	TGACG-motif	58	53
OrBTB7.5	TGACG-motif	112	107
OrBTB7.5	TGACG-motif	434	429
OrBTB7.5	MYB recognition site	1782	1776
OrBTB7.5	ARE	563	557
OrBTB7.5	ARE	827	821
OrBTB7.5	TCA-element	295	286
OrBTB7.5	G-box	21	15
OrBTB7.5	O2-site	139	130
OrBTB7.5	DRE core	167	161
OrBTB7.5	DRE core	1893	1887
OrBTB7.5	W box	472	466
OrBTB7.5	ABRE	432	427
OrBTB7.5	ABRE	454	449
OrBTB7.5	GT1-motif	809	802
OrBTB7.5	GT1-motif	810	804
OrBTB7.5	GT1-motif	1192	1186
OrBTB7.5	ACE	486	477
OrBTB7.5	Myb	969	963
OrBTB7.5	MYC	669	663
OrBTB7.5	MYC	1629	1623
OrBTB7.5	TCCC-motif	1504	1497
OrBTB7.5	as-1	58	53
OrBTB7.5	as-1	112	107
OrBTB7.5	as-1	434	429
OrBTB7.5	CGTCA-motif	20	15
OrBTB7.5	Myc	1529	1522
OrBTB7.5	MYB	571	565
OrBTB7.6	STRE	804	799
OrBTB7.6	TGACG-motif	1064	1059
OrBTB7.6	CCGTCC motif	1737	1731
OrBTB7.6	MSA-like	1809	1800
OrBTB7.6	GCN4_motif	1185	1178
OrBTB7.6	GCN4_motif	1194	1187
OrBTB7.6	A-box	1737	1731
OrBTB7.6	CCGTCC-box	1737	1731
OrBTB7.6	ATC-motif	90	82
OrBTB7.6	ERE	993	985
OrBTB7.6	MYB-like sequence	1550	1544
OrBTB7.6	AAGAA-motif	39	32
OrBTB7.6	ABRE	1011	1006
OrBTB7.6	AP-1	747	739
OrBTB7.6	MYC	1134	1128
OrBTB7.6	MYC	1375	1369
OrBTB7.6	MYC	1497	1491
OrBTB7.6	I-box	1067	1058
OrBTB7.6	as-1	1064	1059
OrBTB7.6	WRE3	201	195
OrBTB7.6	CGTCA-motif	666	661
OrBTB7.6	MYB	365	359
OrBTB7.6	MYB	466	460
OrBTB7.6	MYB	1550	1544
OrBTB8.1	G-Box	1712	1706
OrBTB8.1	TCA-element	1311	1302
OrBTB8.1	WUN-motif	350	342
OrBTB8.1	F-box	625	615
OrBTB8.1	MRE	959	952
OrBTB8.1	STRE	1350	1345
OrBTB8.1	Box 4	1178	1172
OrBTB8.1	Box 4	1410	1404
OrBTB8.1	AE-box	1195	1187
OrBTB8.1	AE-box	1427	1419
OrBTB8.1	TGACG-motif	648	643
OrBTB8.1	TGACG-motif	1983	1978
OrBTB8.1	MYC	968	962
OrBTB8.1	MYC	1031	1025
OrBTB8.1	MYC	1209	1203
OrBTB8.1	MYC	1273	1267
OrBTB8.1	MYC	1677	1671
OrBTB8.1	MYC	1704	1698
OrBTB8.1	MYC	1822	1816
OrBTB8.1	as-1	648	643
OrBTB8.1	as-1	1983	1978
OrBTB8.1	MBS	1172	1166
OrBTB8.1	MBS	1404	1398
OrBTB8.1	MYB	253	247
OrBTB8.1	W box	53	47
OrBTB8.1	AAGAA-motif	1059	1050
OrBTB8.1	AAGAA-motif	1301	1292
OrBTB8.1	Myb	1172	1166
OrBTB8.1	Myb	1404	1398
OrBTB8.10	AT-rich element	1974	1964
OrBTB8.10	G-Box	714	708
OrBTB8.10	TC-rich repeats	887	878
OrBTB8.10	STRE	1712	1707
OrBTB8.10	LTR	370	364
OrBTB8.10	TGACG-motif	1717	1712
OrBTB8.10	ARE	718	712
OrBTB8.10	MYC	1520	1514
OrBTB8.10	as-1	1717	1712
OrBTB8.10	WRE3	21	15
OrBTB8.10	WRE3	296	290
OrBTB8.10	WRE3	797	791
OrBTB8.10	GATT-motif	386	375
OrBTB8.10	AT1-motif	817	804
OrBTB8.10	GT1-motif	456	450
OrBTB8.10	Y-box	1602	1591
OrBTB8.10	Box III	1588	1577
OrBTB8.10	L-box	795	785
OrBTB8.10	CAT-box	1832	1826
OrBTB8.10	Myb	1943	1937
OrBTB8.11	TGACG-motif	342	337
OrBTB8.11	MYB recognition site	290	284
OrBTB8.11	MRE	1293	1286
OrBTB8.11	STRE	324	319
OrBTB8.11	STRE	1910	1905
OrBTB8.11	G-box	732	726
OrBTB8.11	G-box	857	851
OrBTB8.11	ABRE3a	857	851
OrBTB8.11	O2-site	367	358
OrBTB8.11	G-Box	1596	1590
OrBTB8.11	ACE	1863	1854
OrBTB8.11	Myb	1512	1506
OrBTB8.11	Myb	1711	1705
OrBTB8.11	GARE-motif	1083	1076
OrBTB8.11	ABRE	857	852
OrBTB8.11	MBS	1512	1506
OrBTB8.11	MBS	1711	1705
OrBTB8.11	MYC	1044	1038
OrBTB8.11	MYC	1092	1086
OrBTB8.11	MYC	1109	1103
OrBTB8.11	MYC	1161	1155
OrBTB8.11	MYC	1917	1911
OrBTB8.11	I-box	606	597
OrBTB8.11	I-box	770	760
OrBTB8.11	as-1	342	337
OrBTB8.11	CGTCA-motif	131	126
OrBTB8.11	CGTCA-motif	1682	1677
OrBTB8.11	WRE3	1363	1357
OrBTB8.12	CGTCA-motif	1510	1505
OrBTB8.12	CGTCA-motif	1622	1617
OrBTB8.12	CGTCA-motif	1642	1637
OrBTB8.12	MYC	475	469
OrBTB8.12	MYB	1442	1436
OrBTB8.12	Myc	91	84
OrBTB8.12	ABRE	213	208
OrBTB8.12	ABRE	858	853
OrBTB8.12	AAGAA-motif	1204	1197
OrBTB8.12	GATA-motif	679	670
OrBTB8.12	NON-box	1210	1201
OrBTB8.12	Myb	873	867
OrBTB8.12	Myb	1502	1496
OrBTB8.12	Myb-binding site	1442	1436
OrBTB8.12	ACE	1954	1945
OrBTB8.12	GT1-motif	502	495
OrBTB8.12	GT1-motif	503	497
OrBTB8.12	GT1-motif	1810	1803
OrBTB8.12	GT1-motif	1811	1805
OrBTB8.12	CCGTCC-box	1141	1135
OrBTB8.12	G-Box	878	872
OrBTB8.12	G-Box	882	871
OrBTB8.12	WUN-motif	568	559
OrBTB8.12	G-box	1578	1572
OrBTB8.12	TCA-element	75	66
OrBTB8.12	STRE	765	760
OrBTB8.12	RY-element	1310	1302
OrBTB8.12	A-box	1141	1135
OrBTB8.12	ARE	56	50
OrBTB8.12	ARE	144	138
OrBTB8.12	Box 4	1133	1127
OrBTB8.12	CCGTCC motif	1141	1135
OrBTB8.13	G-Box	172	166
OrBTB8.13	CCGTCC-box	1601	1595
OrBTB8.13	DRE1	546	539
OrBTB8.13	STRE	1110	1105
OrBTB8.13	STRE	1365	1360
OrBTB8.13	LTR	112	106
OrBTB8.13	LTR	230	224
OrBTB8.13	TGACG-motif	29	24
OrBTB8.13	TGACG-motif	403	398
OrBTB8.13	CCGTCC motif	1601	1595
OrBTB8.13	ARE	985	979
OrBTB8.13	ARE	1412	1406
OrBTB8.13	A-box	1601	1595
OrBTB8.13	MYC	957	951
OrBTB8.13	MYC	1029	1023
OrBTB8.13	as-1	29	24
OrBTB8.13	as-1	403	398
OrBTB8.13	CGTCA-motif	1147	1142
OrBTB8.13	CGTCA-motif	1220	1215
OrBTB8.13	MYB	1207	1201
OrBTB8.13	MYB	1924	1918
OrBTB8.13	MYB-like sequence	1924	1918
OrBTB8.14	Sp1	765	759
OrBTB8.14	Sp1	819	813
OrBTB8.14	Sp1	852	846
OrBTB8.14	Sp1	989	983
OrBTB8.14	MYB	1136	1130
OrBTB8.14	MYB	1337	1331
OrBTB8.14	MYB	1470	1464
OrBTB8.14	MYB	1803	1797
OrBTB8.14	Myc	1745	1738
OrBTB8.14	as-1	422	417
OrBTB8.14	CGTCA-motif	844	839
OrBTB8.14	CGTCA-motif	1581	1576
OrBTB8.14	MYC	1645	1639
OrBTB8.14	I-box	476	467
OrBTB8.14	Myb	1258	1252
OrBTB8.14	GT1-motif	1032	1026
OrBTB8.14	Myb-binding site	1337	1331
OrBTB8.14	TCT-motif	1744	1738
OrBTB8.14	ABRE	925	920
OrBTB8.14	ABRE	1573	1568
OrBTB8.14	MYB-like sequence	1136	1130
OrBTB8.14	GATA-motif	478	471
OrBTB8.14	GATA-motif	484	477
OrBTB8.14	WUN-motif	320	312
OrBTB8.14	ATC-motif	1321	1313
OrBTB8.14	G-box	1799	1793
OrBTB8.14	AuxRR-core	940	933
OrBTB8.14	ARE	1924	1918
OrBTB8.14	TGACG-motif	422	417
OrBTB8.14	MYB recognition site	208	202
OrBTB8.14	MYB recognition site	238	232
OrBTB8.14	Box 4	1089	1083
OrBTB8.14	STRE	607	602
OrBTB8.14	STRE	681	676
OrBTB8.14	STRE	855	850
OrBTB8.14	STRE	993	988
OrBTB8.14	MRE	30	23
OrBTB8.15	GATA-motif	1172	1163
OrBTB8.15	GATA-motif	1490	1481
OrBTB8.15	MYB-like sequence	1216	1210
OrBTB8.15	ERE	1459	1451
OrBTB8.15	ABRE	39	34
OrBTB8.15	ABRE	304	299
OrBTB8.15	ABRE	320	315
OrBTB8.15	ABRE	1066	1061
OrBTB8.15	W box	614	608
OrBTB8.15	W box	1849	1843
OrBTB8.15	AAGAA-motif	1499	1490
OrBTB8.15	AAGAA-motif	1500	1493
OrBTB8.15	CTAG-motif	1102	1093
OrBTB8.15	CAT-box	1233	1227
OrBTB8.15	CAT-box	1263	1257
OrBTB8.15	CAT-box	1320	1314
OrBTB8.15	CGTCA-motif	267	262
OrBTB8.15	CGTCA-motif	314	309
OrBTB8.15	CGTCA-motif	454	449
OrBTB8.15	WRE3	7	1
OrBTB8.15	as-1	317	312
OrBTB8.15	as-1	642	637
OrBTB8.15	as-1	889	884
OrBTB8.15	as-1	1068	1063
OrBTB8.15	ABRE4	1650	1644
OrBTB8.15	MYB	1216	1210
OrBTB8.15	STRE	894	889
OrBTB8.15	STRE	1525	1520
OrBTB8.15	STRE	1802	1797
OrBTB8.15	Box 4	1548	1542
OrBTB8.15	MYB recognition site	636	630
OrBTB8.15	TGACG-motif	317	312
OrBTB8.15	TGACG-motif	642	637
OrBTB8.15	TGACG-motif	889	884
OrBTB8.15	TGACG-motif	1068	1063
OrBTB8.15	JERE	906	898
OrBTB8.15	ARE	844	838
OrBTB8.15	O2-site	385	377
OrBTB8.15	O2-site	1033	1024
OrBTB8.15	G-box	39	33
OrBTB8.15	G-box	268	262
OrBTB8.15	ABRE3a	39	33
OrBTB8.16	ABRE2	1842	1834
OrBTB8.16	box S	918	911
OrBTB8.16	MYC	1007	1001
OrBTB8.16	MYC	1269	1263
OrBTB8.16	CGTCA-motif	606	601
OrBTB8.16	as-1	1159	1154
OrBTB8.16	ABRE4	566	560
OrBTB8.16	MBS	572	566
OrBTB8.16	MYB	635	629
OrBTB8.16	MYB	810	804
OrBTB8.16	MYB	852	846
OrBTB8.16	MYB	1546	1540
OrBTB8.16	Sp1	652	646
OrBTB8.16	MYB-like sequence	810	804
OrBTB8.16	MYB-like sequence	852	846
OrBTB8.16	MYB-like sequence	1546	1540
OrBTB8.16	ABRE	643	638
OrBTB8.16	ABRE	755	750
OrBTB8.16	ABRE	1810	1804
OrBTB8.16	ABRE	1843	1837
OrBTB8.16	W box	1012	1006
OrBTB8.16	Myb-binding site	635	629
OrBTB8.16	Myb	572	566
OrBTB8.16	Myb	1137	1131
OrBTB8.16	CCGTCC-box	1959	1953
OrBTB8.16	G-Box	1810	1804
OrBTB8.16	G-Box	1843	1837
OrBTB8.16	G-box	643	637
OrBTB8.16	G-box	942	933
OrBTB8.16	G-box	1810	1804
OrBTB8.16	G-box	1841	1832
OrBTB8.16	G-box	1843	1837
OrBTB8.16	MBSI	1625	1614
OrBTB8.16	ABRE3a	643	637
OrBTB8.16	STRE	469	464
OrBTB8.16	MYB recognition site	150	144
OrBTB8.16	Box 4	1377	1371
OrBTB8.16	Box 4	1983	1977
OrBTB8.16	CCGTCC motif	1959	1953
OrBTB8.16	TGACG-motif	1159	1154
OrBTB8.16	A-box	1959	1953
OrBTB8.16	ARE	304	298
OrBTB8.16	ARE	1817	1811
OrBTB8.17	TGACG-motif	520	515
OrBTB8.17	Box 4	1151	1145
OrBTB8.17	Box 4	1241	1235
OrBTB8.17	Box 4	1494	1488
OrBTB8.17	Box 4	1830	1824
OrBTB8.17	AP-1	1589	1581
OrBTB8.17	as-1	520	515
OrBTB8.17	WRE3	1816	1810
OrBTB8.17	MYC	1969	1963
OrBTB8.17	TCCC-motif	1401	1394
OrBTB8.17	box S	180	173
OrBTB8.17	MYB	1933	1927
OrBTB8.17	chs-CMA1a	337	329
OrBTB8.18	AT1-motif	507	494
OrBTB8.18	MYB	882	876
OrBTB8.18	MYB	1352	1346
OrBTB8.18	MYC	187	181
OrBTB8.18	MYC	314	308
OrBTB8.18	CAT-box	551	545
OrBTB8.18	CAT-box	872	866
OrBTB8.18	CAT-box	941	935
OrBTB8.18	Myb-binding site	1352	1346
OrBTB8.18	ABRE	435	430
OrBTB8.18	ERE	137	129
OrBTB8.18	O2-site	386	378
OrBTB8.18	TC-rich repeats	280	271
OrBTB8.18	AT-rich element	59	49
OrBTB8.18	Box 4	1469	1463
OrBTB8.18	Box 4	1473	1467
OrBTB8.18	Box 4	1480	1474
OrBTB8.18	Box 4	1841	1835
OrBTB8.18	Box 4	1845	1839
OrBTB8.18	MYB recognition site	1404	1398
OrBTB8.18	GA-motif	1850	1842
OrBTB8.18	STRE	116	111
OrBTB8.18	STRE	254	249
OrBTB8.18	STRE	774	769
OrBTB8.19	box S	308	301
OrBTB8.19	MYC	1006	1000
OrBTB8.19	MYC	1152	1146
OrBTB8.19	WRE3	215	209
OrBTB8.19	WRE3	1367	1361
OrBTB8.19	CGTCA-motif	962	957
OrBTB8.19	as-1	120	115
OrBTB8.19	as-1	322	317
OrBTB8.19	as-1	513	508
OrBTB8.19	as-1	783	778
OrBTB8.19	MYB	545	539
OrBTB8.19	MYB	674	668
OrBTB8.19	MYB	1186	1180
OrBTB8.19	MYB-like sequence	545	539
OrBTB8.19	MYB-like sequence	1186	1180
OrBTB8.19	Myb-binding site	674	668
OrBTB8.19	GC-motif	281	275
OrBTB8.19	O2-site	390	381
OrBTB8.19	ATCT-motif	1525	1516
OrBTB8.19	RY-element	1769	1761
OrBTB8.19	LTR	1884	1878
OrBTB8.19	3-AF3 binding site	1290	1280
OrBTB8.19	TGACG-motif	120	115
OrBTB8.19	TGACG-motif	322	317
OrBTB8.19	TGACG-motif	513	508
OrBTB8.19	TGACG-motif	783	778
OrBTB8.19	ARE	426	420
OrBTB8.19	ARE	1445	1439
OrBTB8.2	STRE	701	696
OrBTB8.2	STRE	736	731
OrBTB8.2	STRE	775	770
OrBTB8.2	STRE	796	791
OrBTB8.2	STRE	812	807
OrBTB8.2	ARE	208	202
OrBTB8.2	ARE	1421	1415
OrBTB8.2	A-box	841	835
OrBTB8.2	A-box	1020	1014
OrBTB8.2	MYB recognition site	301	295
OrBTB8.2	Box 4	1716	1710
OrBTB8.2	Box 4	1745	1739
OrBTB8.2	CCGTCC motif	841	835
OrBTB8.2	CCGTCC motif	1020	1014
OrBTB8.2	GC-motif	898	892
OrBTB8.2	GC-motif	1073	1067
OrBTB8.2	CCGTCC-box	841	835
OrBTB8.2	CCGTCC-box	1020	1014
OrBTB8.2	G-box	403	397
OrBTB8.2	ABRE	605	600
OrBTB8.2	MYB-like sequence	50	44
OrBTB8.2	GT1-motif	435	429
OrBTB8.2	MYC	1531	1525
OrBTB8.2	box S	1077	1070
OrBTB8.2	box S	1097	1090
OrBTB8.2	MYB	50	44
OrBTB8.2	MYB	1557	1551
OrBTB8.20	CCGTCC-box	1121	1115
OrBTB8.20	LTR	1364	1358
OrBTB8.20	STRE	905	900
OrBTB8.20	A-box	1121	1115
OrBTB8.20	CCGTCC motif	1121	1115
OrBTB8.20	TGACG-motif	1937	1932
OrBTB8.20	TGA-element	1543	1537
OrBTB8.20	as-1	1937	1932
OrBTB8.20	MYC	311	305
OrBTB8.20	MYC	832	826
OrBTB8.20	MYC	1373	1367
OrBTB8.20	MYC	1703	1697
OrBTB8.20	MYB	450	444
OrBTB8.20	ABRE	1672	1667
OrBTB8.20	TCT-motif	964	958
OrBTB8.21	GC-motif	1314	1308
OrBTB8.21	CCGTCC-box	337	331
OrBTB8.21	O2-site	1423	1414
OrBTB8.21	STRE	121	116
OrBTB8.21	LTR	580	574
OrBTB8.21	ARE	1459	1453
OrBTB8.21	A-box	337	331
OrBTB8.21	TGACG-motif	1153	1148
OrBTB8.21	TGACG-motif	1355	1350
OrBTB8.21	TGACG-motif	1546	1541
OrBTB8.21	TGACG-motif	1816	1811
OrBTB8.21	CCGTCC motif	337	331
OrBTB8.21	as-1	1153	1148
OrBTB8.21	as-1	1355	1350
OrBTB8.21	as-1	1546	1541
OrBTB8.21	as-1	1816	1811
OrBTB8.21	WRE3	1248	1242
OrBTB8.21	TGA-element	759	753
OrBTB8.21	CGTCA-motif	1995	1990
OrBTB8.21	MYC	48	42
OrBTB8.21	MYC	589	583
OrBTB8.21	MYC	919	913
OrBTB8.21	box S	1341	1334
OrBTB8.21	MYB	1578	1572
OrBTB8.21	MYB	1707	1701
OrBTB8.21	ABRE	888	883
OrBTB8.21	MYB-like sequence	1578	1572
OrBTB8.21	Myb-binding site	1707	1701
OrBTB8.21	TCT-motif	180	174
OrBTB8.22	AC-I	999	990
OrBTB8.22	TCA	87	78
OrBTB8.22	CAT-box	137	131
OrBTB8.22	OCT	979	971
OrBTB8.22	ACE	1629	1620
OrBTB8.22	W box	606	600
OrBTB8.22	DRE core	1151	1145
OrBTB8.22	ABRE	1251	1245
OrBTB8.22	GATA-motif	260	251
OrBTB8.22	Sp1	716	710
OrBTB8.22	Sp1	1750	1744
OrBTB8.22	WRE3	568	562
OrBTB8.22	WRE3	998	992
OrBTB8.22	WRE3	1229	1223
OrBTB8.22	CGTCA-motif	1108	1103
OrBTB8.22	as-1	1709	1704
OrBTB8.22	as-1	1969	1964
OrBTB8.22	P-box	1519	1512
OrBTB8.22	I-box	258	249
OrBTB8.22	MYC	66	60
OrBTB8.22	MYC	1099	1093
OrBTB8.22	MYC	1113	1107
OrBTB8.22	ARE	153	147
OrBTB8.22	ARE	571	565
OrBTB8.22	Box 4	1913	1907
OrBTB8.22	TGACG-motif	1709	1704
OrBTB8.22	TGACG-motif	1969	1964
OrBTB8.22	STRE	460	455
OrBTB8.22	STRE	519	514
OrBTB8.22	STRE	679	674
OrBTB8.22	STRE	1380	1375
OrBTB8.22	STRE	1727	1722
OrBTB8.22	AuxRR-core	635	628
OrBTB8.22	O2-site	1169	1160
OrBTB8.22	TCA-element	629	620
OrBTB8.22	G-box	1251	1245
OrBTB8.22	G-Box	1251	1245
OrBTB8.23	ABRE	1750	1745
OrBTB8.23	W box	79	73
OrBTB8.23	GATT-motif	41	30
OrBTB8.23	ABRE4	519	513
OrBTB8.23	ABRE4	1143	1137
OrBTB8.23	MYC	151	145
OrBTB8.23	MYC	871	865
OrBTB8.23	CGTCA-motif	523	518
OrBTB8.23	CGTCA-motif	1460	1455
OrBTB8.23	CCGTCC motif	1720	1714
OrBTB8.23	A-box	1720	1714
OrBTB8.23	AT-rich sequence	1225	1216
OrBTB8.23	STRE	173	168
OrBTB8.23	STRE	741	736
OrBTB8.23	TCA-element	1678	1669
OrBTB8.23	CCGTCC-box	1720	1714
OrBTB8.23	G-Box	963	957
OrBTB8.24	MYC	337	331
OrBTB8.24	MYC	951	945
OrBTB8.24	as-1	67	62
OrBTB8.24	MBS	632	626
OrBTB8.24	TGA-box	64	56
OrBTB8.24	MYB	248	242
OrBTB8.24	MYB	1198	1192
OrBTB8.24	AAGAA-motif	361	354
OrBTB8.24	Myb-binding site	248	242
OrBTB8.24	Myb-binding site	1198	1192
OrBTB8.24	TCA	1547	1538
OrBTB8.24	Myb	632	626
OrBTB8.24	RY-element	1414	1406
OrBTB8.24	STRE	539	534
OrBTB8.24	STRE	1117	1112
OrBTB8.24	STRE	1166	1161
OrBTB8.24	STRE	1227	1222
OrBTB8.24	TGACG-motif	67	62
OrBTB8.24	AE-box	1847	1839
OrBTB8.24	ARE	60	54
OrBTB8.3	Sp1	1020	1014
OrBTB8.3	Sp1	1080	1074
OrBTB8.3	MBS	973	967
OrBTB8.3	TGA-element	1121	1115
OrBTB8.3	TGA-element	1160	1154
OrBTB8.3	CGTCA-motif	906	901
OrBTB8.3	CGTCA-motif	1096	1091
OrBTB8.3	as-1	1890	1885
OrBTB8.3	MYC	192	186
OrBTB8.3	MYC	617	611
OrBTB8.3	Myb	973	967
OrBTB8.3	ACE	1790	1781
OrBTB8.3	DRE core	1849	1843
OrBTB8.3	W box	450	444
OrBTB8.3	GARE-motif	102	95
OrBTB8.3	ABRE	1596	1587
OrBTB8.3	ABRE	1598	1593
OrBTB8.3	G-box	1870	1864
OrBTB8.3	GC-motif	1231	1225
OrBTB8.3	GC-motif	1805	1796
OrBTB8.3	CCGTCC-box	1056	1050
OrBTB8.3	A-box	1056	1050
OrBTB8.3	ARE	220	214
OrBTB8.3	CCGTCC motif	1056	1050
OrBTB8.3	Box 4	1471	1465
OrBTB8.3	TGACG-motif	1890	1885
OrBTB8.3	LTR	1587	1581
OrBTB8.3	LTR	1632	1626
OrBTB8.3	STRE	216	211
OrBTB8.3	STRE	1250	1245
OrBTB8.3	STRE	1280	1275
OrBTB8.3	DRE1	639	632
OrBTB8.3	DRE1	1916	1909
OrBTB8.4	G-Box	1108	1102
OrBTB8.4	TC-rich repeats	1768	1759
OrBTB8.4	AuxRR-core	968	961
OrBTB8.4	ATC-motif	308	300
OrBTB8.4	MRE	1841	1834
OrBTB8.4	ARE	1926	1920
OrBTB8.4	P-box	324	317
OrBTB8.4	LAMP-element	1660	1652
OrBTB8.4	WRE3	856	850
OrBTB8.4	WRE3	867	861
OrBTB8.4	WRE3	1354	1348
OrBTB8.4	MBS	1426	1420
OrBTB8.4	MYB	1399	1393
OrBTB8.4	MYB-like sequence	1399	1393
OrBTB8.4	AAGAA-motif	1322	1315
OrBTB8.4	GARE-motif	436	429
OrBTB8.4	Myb	1426	1420
OrBTB8.5	MYB	1271	1265
OrBTB8.5	MYC	345	339
OrBTB8.5	I-box	336	327
OrBTB8.5	I-box	865	856
OrBTB8.5	I-box	1728	1719
OrBTB8.5	box S	673	666
OrBTB8.5	as-1	742	737
OrBTB8.5	as-1	1151	1146
OrBTB8.5	CGTCA-motif	1567	1562
OrBTB8.5	CGTCA-motif	1577	1572
OrBTB8.5	TGA-element	530	524
OrBTB8.5	GT1-motif	331	325
OrBTB8.5	MYB-like sequence	1271	1265
OrBTB8.5	GATA-motif	867	860
OrBTB8.5	ERE	487	479
OrBTB8.5	ERE	1250	1242
OrBTB8.5	ABRE	32	27
OrBTB8.5	ABRE	140	135
OrBTB8.5	DRE core	1478	1472
OrBTB8.5	W box	586	580
OrBTB8.5	W box	1011	1005
OrBTB8.5	G-box	32	26
OrBTB8.5	G-box	140	134
OrBTB8.5	G-box	771	762
OrBTB8.5	ABRE3a	32	26
OrBTB8.5	ABRE3a	140	134
OrBTB8.5	TGACG-motif	742	737
OrBTB8.5	TGACG-motif	1151	1146
OrBTB8.5	Box 4	1303	1297
OrBTB8.5	Box 4	1949	1943
OrBTB8.5	DRE1	1360	1353
OrBTB8.5	STRE	524	519
OrBTB8.5	STRE	615	610
OrBTB8.5	STRE	843	838
OrBTB8.5	STRE	1545	1540
OrBTB8.5	LTR	728	722
OrBTB8.6	G-box	592	586
OrBTB8.6	G-box	1559	1553
OrBTB8.6	chs-CMA2a	512	504
OrBTB8.6	F-box	22	12
OrBTB8.6	TGACG-motif	704	699
OrBTB8.6	TGACG-motif	1371	1366
OrBTB8.6	Box 4	1413	1407
OrBTB8.6	MYC	1281	1275
OrBTB8.6	as-1	704	699
OrBTB8.6	as-1	1371	1366
OrBTB8.6	WRE3	762	756
OrBTB8.6	Myc	565	558
OrBTB8.6	MYB	364	358
OrBTB8.6	MYB	802	796
OrBTB8.6	MYB	1330	1324
OrBTB8.6	MYB	1613	1607
OrBTB8.6	MYB-like sequence	364	358
OrBTB8.6	MYB-like sequence	802	796
OrBTB8.6	AAGAA-motif	1023	1016
OrBTB8.6	W box	120	114
OrBTB8.6	DRE core	714	708
OrBTB8.6	TCT-motif	195	189
OrBTB8.6	TCT-motif	564	558
OrBTB8.6	TCA	846	837
OrBTB8.6	CAT-box	772	766
OrBTB8.7	MYB	723	717
OrBTB8.7	MYB	1318	1312
OrBTB8.7	ABRE4	1734	1728
OrBTB8.7	circadian	1051	1042
OrBTB8.7	WRE3	359	353
OrBTB8.7	CGTCA-motif	989	984
OrBTB8.7	CGTCA-motif	1416	1411
OrBTB8.7	MYC	782	776
OrBTB8.7	MYC	1038	1032
OrBTB8.7	TCT-motif	1753	1747
OrBTB8.7	W box	429	423
OrBTB8.7	W box	742	736
OrBTB8.7	ABRE	153	144
OrBTB8.7	MYB-like sequence	1318	1312
OrBTB8.7	G-box	19	13
OrBTB8.7	G-box	220	214
OrBTB8.7	GC-motif	136	127
OrBTB8.7	CCGTCC-box	490	484
OrBTB8.7	A-box	490	484
OrBTB8.7	CCGTCC motif	490	484
OrBTB8.7	Box 4	1210	1204
OrBTB8.7	Box 4	1849	1843
OrBTB8.7	MYB recognition site	1193	1187
OrBTB8.7	STRE	1958	1953
OrBTB8.7	MRE	1321	1314
OrBTB8.7	F-box	746	736
OrBTB8.8	CAT-box	733	727
OrBTB8.8	MYB-like sequence	1744	1738
OrBTB8.8	AAGAA-motif	1885	1878
OrBTB8.8	W box	345	339
OrBTB8.8	ABRE	1751	1745
OrBTB8.8	MYB	1744	1738
OrBTB8.8	MYC	951	945
OrBTB8.8	box S	1194	1187
OrBTB8.8	as-1	26	21
OrBTB8.8	as-1	49	44
OrBTB8.8	as-1	256	251
OrBTB8.8	as-1	1781	1776
OrBTB8.8	CGTCA-motif	721	716
OrBTB8.8	CGTCA-motif	905	900
OrBTB8.8	CGTCA-motif	1670	1665
OrBTB8.8	TGACG-motif	26	21
OrBTB8.8	TGACG-motif	49	44
OrBTB8.8	TGACG-motif	256	251
OrBTB8.8	TGACG-motif	1781	1776
OrBTB8.8	Box 4	1909	1903
OrBTB8.8	ARE	1956	1950
OrBTB8.8	SARE	1626	1615
OrBTB8.8	STRE	1931	1926
OrBTB8.8	G-box	1153	1147
OrBTB8.8	G-box	1751	1745
OrBTB8.8	AT-rich element	1880	1870
OrBTB8.8	G-Box	1751	1745
OrBTB8.8	GC-motif	724	718
OrBTB8.9	MYB	696	690
OrBTB8.9	AT1-motif	1897	1884
OrBTB8.9	GATT-motif	1466	1455
OrBTB8.9	CGTCA-motif	302	297
OrBTB8.9	CGTCA-motif	793	788
OrBTB8.9	CGTCA-motif	853	848
OrBTB8.9	CGTCA-motif	883	878
OrBTB8.9	CGTCA-motif	949	944
OrBTB8.9	WRE3	1101	1095
OrBTB8.9	WRE3	1376	1370
OrBTB8.9	WRE3	1877	1871
OrBTB8.9	GT1-motif	1536	1530
OrBTB8.9	L-box	1875	1865
OrBTB8.9	Myb-binding site	696	690
OrBTB8.9	ABRE	1004	998
OrBTB8.9	G-box	884	878
OrBTB8.9	G-box	945	939
OrBTB8.9	G-box	950	944
OrBTB8.9	G-box	1004	998
OrBTB8.9	O2-site	70	61
OrBTB8.9	TC-rich repeats	1967	1958
OrBTB8.9	G-Box	1004	998
OrBTB8.9	G-Box	1794	1788
OrBTB8.9	ARE	1798	1792
OrBTB8.9	Box 4	1713	1707
OrBTB8.9	Box 4	1828	1822
OrBTB8.9	STRE	500	495
OrBTB8.9	STRE	824	819
OrBTB8.9	STRE	966	961
OrBTB8.9	STRE	971	966
OrBTB8.9	LTR	1450	1444
OrBTB9.1	LTR	1739	1733
OrBTB9.1	STRE	1509	1504
OrBTB9.1	MRE	636	629
OrBTB9.1	ARE	1245	1239
OrBTB9.1	ARE	1554	1548
OrBTB9.1	TGACG-motif	1377	1372
OrBTB9.1	ABRE	100	95
OrBTB9.1	MYB-like sequence	1291	1285
OrBTB9.1	MYB-like sequence	1841	1835
OrBTB9.1	MYB-like sequence	1941	1935
OrBTB9.1	MYB-like sequence	1970	1964
OrBTB9.1	Myb	187	181
OrBTB9.1	GT1-motif	304	298
OrBTB9.1	as-1	1377	1372
OrBTB9.1	MYC	1711	1705
OrBTB9.1	MYB	739	733
OrBTB9.1	MYB	770	764
OrBTB9.1	MYB	1291	1285
OrBTB9.1	MYB	1841	1835
OrBTB9.1	MYB	1941	1935
OrBTB9.1	MYB	1970	1964
OrBTB9.2	MSA-like	395	386
OrBTB9.2	MSA-like	397	388
OrBTB9.2	ARE	1292	1286
OrBTB9.2	A-box	1115	1109
OrBTB9.2	TGACG-motif	745	740
OrBTB9.2	TGACG-motif	1993	1988
OrBTB9.2	MYB recognition site	416	410
OrBTB9.2	Box 4	1175	1169
OrBTB9.2	CCGTCC motif	1115	1109
OrBTB9.2	STRE	274	269
OrBTB9.2	STRE	1720	1715
OrBTB9.2	STRE	1961	1956
OrBTB9.2	LTR	1076	1070
OrBTB9.2	GC-motif	1079	1073
OrBTB9.2	CCGTCC-box	1115	1109
OrBTB9.2	CAT-box	301	295
OrBTB9.2	Myb	379	373
OrBTB9.2	Myb	599	593
OrBTB9.2	Myb-binding site	442	436
OrBTB9.2	AAGAA-motif	1073	1066
OrBTB9.2	ABRE	1150	1145
OrBTB9.2	ERE	1304	1296
OrBTB9.2	MYB	442	436
OrBTB9.2	MYB	718	712
OrBTB9.2	MBS	379	373
OrBTB9.2	MBS	599	593
OrBTB9.2	as-1	745	740
OrBTB9.2	as-1	1993	1988
OrBTB9.2	CGTCA-motif	1524	1519
OrBTB9.3	GTGGC-motif	1918	1908
OrBTB9.3	ERE	741	733
OrBTB9.3	AAGAA-motif	1731	1722
OrBTB9.3	ABRE	1419	1413
OrBTB9.3	W box	384	378
OrBTB9.3	GT1-motif	123	116
OrBTB9.3	GT1-motif	124	118
OrBTB9.3	CAT-box	1350	1344
OrBTB9.3	Myb	1834	1828
OrBTB9.3	MYC	643	637
OrBTB9.3	MYC	1396	1390
OrBTB9.3	MYC	1700	1694
OrBTB9.3	MYC	1713	1707
OrBTB9.3	box S	259	252
OrBTB9.3	CGTCA-motif	1043	1038
OrBTB9.3	CGTCA-motif	1179	1174
OrBTB9.3	CGTCA-motif	1542	1537
OrBTB9.3	TGA-element	1330	1324
OrBTB9.3	ABRE4	292	286
OrBTB9.3	ABRE4	1153	1147
OrBTB9.3	ABRE4	1403	1397
OrBTB9.3	ABRE4	1774	1768
OrBTB9.3	MBS	1834	1828
OrBTB9.3	MYB	317	311
OrBTB9.3	MYB	1649	1643
OrBTB9.3	STRE	1952	1947
OrBTB9.3	Box 4	1442	1436
OrBTB9.3	G-Box	1419	1413
OrBTB9.3	G-box	1131	1125
OrBTB9.3	G-box	1419	1413
OrBTB9.3	ATC-motif	920	912
OrBTB9.4	LTR	677	671
OrBTB9.4	TGACG-motif	1653	1648
OrBTB9.4	MYB recognition site	178	172
OrBTB9.4	MYB recognition site	634	628
OrBTB9.4	ARE	795	789
OrBTB9.4	ARE	1584	1578
OrBTB9.4	O2-site	450	441
OrBTB9.4	MYB-like sequence	1475	1469
OrBTB9.4	AAGAA-motif	712	705
OrBTB9.4	ABRE	977	972
OrBTB9.4	Myb-binding site	1032	1026
OrBTB9.4	AC-I	194	185
OrBTB9.4	AC-I	1636	1627
OrBTB9.4	TCA	804	795
OrBTB9.4	CAT-box	141	135
OrBTB9.4	CAT-box	1890	1884
OrBTB9.4	MYC	1561	1555
OrBTB9.4	as-1	1653	1648
OrBTB9.4	TGA-element	980	974
OrBTB9.4	CGTCA-motif	903	898
[truncated: 4,095 more rows]
