# Supplementary material for: BTB/POZ proteins and their gene family in Oryza rufipogon: Novel genes and alleles from the progenitor of the domesticated japonica rice (O. sativa L.)
Source: Research Square preprint supplement (doi:10.21203/rs.3.rs-1918471/v2), 2022-09-26
Supplement: Supplementary file 7 [file 3bef5451522cbf07cbb30726.xlsx]

## Sheet: Sheet1
Supplementary Table S3: Ka/Ks ratio and divergence time of OrBTB co-paralogs
Genes in co-paralogs relationship	Ka	Ks	Ka/Ks	Divergence time (MYA)	Selection type
OrBTB11.1:OrBTB12.1	0.0374918	0.0961743	0.389832	7.39802	Purifying selection
OrBTB12.3:OrBTB3.4	0.146155	1.16484	0.125472	89.6028	Purifying selection
OrBTB2.6:OrBTB4.4	0.342166	0.471558	0.725607	36.2737	Purifying selection
OrBTB3.7:OrBTB7.3	0.117001	0.79124	0.14787	60.8646	Purifying selection
OrBTB4.1:OrBTB4.2	0.363611	0.798246	0.455513	61.4035	Purifying selection
OrBTB6.5:OrBTB6.6	0.490643	0.921041	0.532705	70.8493	Purifying selection
OrBTB6.6:OrBTB6.7	0.476745	0.903158	0.527864	69.4737	Purifying selection
OrBTB8.9:OrBTB8.10	0.318968	0.649936	0.490769	49.9951	Purifying selection
OrBTB8.10:OrBTB8.11	0.323326	0.772732	0.418419	59.441	Purifying selection
OrBTB8.15:OrBTB8.16	0.244288	0.42687	0.572276	32.8361	Purifying selection
OrBTB8.21:OrBTB8.22	0.400903	0.797827	0.502494	61.3713	Purifying selection
OrBTB8.23:OrBTB8.24	0.398221	0.925408	0.430319	71.1852	Purifying selection
OrBTB9.2:OrBTB9.3	0.327665	0.891293	0.367628	68.561	Purifying selection
OrBTB10.1:OrBTB10.2	0.108695	0.15523	0.700219	11.9407	Purifying selection
OrBTB10.4:OrBTB10.5	0.643857	0.904443	0.711881	69.5726	Purifying selection
OrBTB10.5:OrBTB10.6	0.589756	0.917719	0.642632	70.5937	Purifying selection
OrBTB10.7:OrBTB10.8	0.0944927	0.296729	0.318447	22.8253	Purifying selection
OrBTB10.8:OrBTB10.9	0.287002	0.566025	0.507048	43.5404	Purifying selection
OrBTB10.10:OrBTB10.11	0.474869	1.00168	0.474071	77.0526	Purifying selection
OrBTB10.14:OrBTB10.15	0.309205	0.82933	0.372837	63.7946	Purifying selection
OrBTB10.18:OrBTB10.19	0.348039	0.943505	0.368879	72.5773	Purifying selection
OrBTB10.22:OrBTB10.23	0.298933	1.11141	0.268968	85.4929	Purifying selection
OrBTB11.8:OrBTB11.9	0.447726	0.61396	0.729243	47.2277	Purifying selection
OrBTB11.9:OrBTB11.10	0.0429787	0.100841	0.426202	7.75702	Purifying selection
