# Supplementary material for: BTB/POZ proteins and their gene family in Oryza rufipogon: Novel genes and alleles from the progenitor of the domesticated japonica rice (O. sativa L.)
Source: Research Square preprint supplement (doi:10.21203/rs.3.rs-1918471/v2), 2022-09-26
Supplement: Supplementary file 8 [file 49e72aa7c15c3efd200cf41a.xlsx]

## Sheet: Supplementary_table_9_GO
Supplementary Table S9: Gene ontology enrichment analysis of the OrBTB genes
GO Category	Enrichment FDR	nGenes	Pathway Genes	Fold Enrichment	Pathway	URL	Genes
Molecular function	9.7e-105	110	4131	8.97386	Protein binding	http://amigo.geneontology.org/cgi-bin/amigo/term_details?term=GO:0005515	ORUFI01G35500 ORUFI01G43500 ORUFI01G44480 ORUFI01G46370 ORUFI01G47340 ORUFI02G11310 ORUFI02G13980 ORUFI02G14000 ORUFI02G14020 ORUFI02G14050 ORUFI02G24050 ORUFI02G34930 ORUFI03G07610 ORUFI03G07690 ORUFI03G26720 ORUFI03G28320 ORUFI03G29880 ORUFI03G31230 ORUFI03G38580 ORUFI04G02660 ORUFI04G02670 ORUFI04G14290 ORUFI04G17810 ORUFI04G27660 ORUFI04G28350 ORUFI04G29880 ORUFI05G13500 ORUFI05G16760 ORUFI05…
Molecular function	5.69e-05	3	13	77.7713	Histone acetyltransferase activity	http://amigo.geneontology.org/cgi-bin/amigo/term_details?term=GO:0004402	ORUFI01G43500 ORUFI02G24050 ORUFI04G17810
Molecular function	5.69e-05	3	13	77.7713	Peptide-lysine-N-acetyltransferase activity	http://amigo.geneontology.org/cgi-bin/amigo/term_details?term=GO:0061733	ORUFI01G43500 ORUFI02G24050 ORUFI04G17810
Molecular function	6.76e-05	3	15	67.4018	Peptide N-acetyltransferase activity	http://amigo.geneontology.org/cgi-bin/amigo/term_details?term=GO:0034212	ORUFI01G43500 ORUFI02G24050 ORUFI04G17810
Molecular function	0.00263697	3	58	17.4315	Transcription coregulator activity	http://amigo.geneontology.org/cgi-bin/amigo/term_details?term=GO:0003712	ORUFI01G43500 ORUFI02G24050 ORUFI04G17810
Molecular function	0.00263697	3	57	17.7373	N-acetyltransferase activity	http://amigo.geneontology.org/cgi-bin/amigo/term_details?term=GO:0008080	ORUFI01G43500 ORUFI02G24050 ORUFI04G17810
Molecular function	0.00263697	3	60	16.8505	N-acyltransferase activity	http://amigo.geneontology.org/cgi-bin/amigo/term_details?term=GO:0016410	ORUFI01G43500 ORUFI02G24050 ORUFI04G17810
Molecular function	0.00361242	3	70	14.4432	Acetyltransferase activity	http://amigo.geneontology.org/cgi-bin/amigo/term_details?term=GO:0016407	ORUFI01G43500 ORUFI02G24050 ORUFI04G17810
Cellular component	0.0314514	3	147	6.87774	Host cellular component	http://amigo.geneontology.org/cgi-bin/amigo/term_details?term=GO:0018995	ORUFI01G43500 ORUFI02G24050 ORUFI04G17810					c
Cellular component	0.0314514	3	147	6.87774	Host cell part	http://amigo.geneontology.org/cgi-bin/amigo/term_details?term=GO:0033643	ORUFI01G43500 ORUFI02G24050 ORUFI04G17810
Cellular component	0.0314514	3	147	6.87774	Host intracellular part	http://amigo.geneontology.org/cgi-bin/amigo/term_details?term=GO:0033646	ORUFI01G43500 ORUFI02G24050 ORUFI04G17810
Cellular component	0.0314514	3	146	6.92484	Host intracellular organelle	http://amigo.geneontology.org/cgi-bin/amigo/term_details?term=GO:0033647	ORUFI01G43500 ORUFI02G24050 ORUFI04G17810
Cellular component	0.0314514	3	146	6.92484	Host intracellular membrane-bounded organelle	http://amigo.geneontology.org/cgi-bin/amigo/term_details?term=GO:0033648	ORUFI01G43500 ORUFI02G24050 ORUFI04G17810
Cellular component	0.0314514	3	146	6.92484	Host cell nucleus	http://amigo.geneontology.org/cgi-bin/amigo/term_details?term=GO:0042025	ORUFI01G43500 ORUFI02G24050 ORUFI04G17810
Cellular component	0.0314514	3	147	6.87774	Host intracellular region	http://amigo.geneontology.org/cgi-bin/amigo/term_details?term=GO:0043656	ORUFI01G43500 ORUFI02G24050 ORUFI04G17810
Cellular component	0.0314514	3	147	6.87774	Host cell	http://amigo.geneontology.org/cgi-bin/amigo/term_details?term=GO:0043657	ORUFI01G43500 ORUFI02G24050 ORUFI04G17810
Biological process	4.37e-10	13	296	14.8011	Protein ubiquitination	http://amigo.geneontology.org/cgi-bin/amigo/term_details?term=GO:0016567	ORUFI03G07610 ORUFI03G07690 ORUFI03G26720 ORUFI03G28320 ORUFI04G28350 ORUFI06G05610 ORUFI07G00140 ORUFI07G01530 ORUFI07G26650 ORUFI08G02180 ORUFI09G11290 ORUFI12G19040 ORUFI12G20870
Biological process	4.37e-10	13	308	14.2244	Protein modification by small protein conjugation	http://amigo.geneontology.org/cgi-bin/amigo/term_details?term=GO:0032446	ORUFI03G07610 ORUFI03G07690 ORUFI03G26720 ORUFI03G28320 ORUFI04G28350 ORUFI06G05610 ORUFI07G00140 ORUFI07G01530 ORUFI07G26650 ORUFI08G02180 ORUFI09G11290 ORUFI12G19040 ORUFI12G20870
Biological process	2.83e-09	13	370	11.8409	Protein modification by small protein conjugation or removal	http://amigo.geneontology.org/cgi-bin/amigo/term_details?term=GO:0070647	ORUFI03G07610 ORUFI03G07690 ORUFI03G26720 ORUFI03G28320 ORUFI04G28350 ORUFI06G05610 ORUFI07G00140 ORUFI07G01530 ORUFI07G26650 ORUFI08G02180 ORUFI09G11290 ORUFI12G19040 ORUFI12G20870
