# Supplementary material for: BTB/POZ proteins and their gene family in Oryza rufipogon: Novel genes and alleles from the progenitor of the domesticated japonica rice (O. sativa L.)
Source: Research Square preprint supplement (doi:10.21203/rs.3.rs-1918471/v2), 2022-09-26
Supplement: Supplementary file 9 [file 4b45bf24ddfa28bbfb19e279.xlsx]

## Sheet: Sheet1
Supplementary Table S10:Prediction and modeling of protein-protein interaction among the BTB/POZ protein family members of Oryza rufipogon using the STRING database and Markov Cluster Algorithm (MCL)
clustering method	cluster number	cluster color	gene count	protein name	protein identifier
MCL	1	Red	87	OrBTB1.1	4529.ORUFI01G35500.1
MCL	1	Red	87	OrBTB1.5	4529.ORUFI01G47340.1
MCL	1	Red	87	OrBTB10.1	4529.ORUFI10G11040.1
MCL	1	Red	87	OrBTB10.10	4529.ORUFI10G11180.1
MCL	1	Red	87	OrBTB10.11	4529.ORUFI10G11190.1
MCL	1	Red	87	OrBTB10.12	4529.ORUFI10G11200.1
MCL	1	Red	87	OrBTB10.13	4529.ORUFI10G11230.2
MCL	1	Red	87	OrBTB10.14	4529.ORUFI10G11410.1
MCL	1	Red	87	OrBTB10.15	4529.ORUFI10G11420.1
MCL	1	Red	87	OrBTB10.16	4529.ORUFI10G11450.1
MCL	1	Red	87	OrBTB10.17	4529.ORUFI10G11470.1
MCL	1	Red	87	OrBTB10.18	4529.ORUFI10G11500.1
MCL	1	Red	87	OrBTB10.19	4529.ORUFI10G11510.1
MCL	1	Red	87	OrBTB10.2	4529.ORUFI10G11050.1
MCL	1	Red	87	OrBTB10.20	4529.ORUFI10G11550.1
MCL	1	Red	87	OrBTB10.21	4529.ORUFI10G11570.1
MCL	1	Red	87	OrBTB10.22	4529.ORUFI10G11820.1
MCL	1	Red	87	OrBTB10.23	4529.ORUFI10G11830.1
MCL	1	Red	87	OrBTB10.3	4529.ORUFI10G11060.1
MCL	1	Red	87	OrBTB10.4	4529.ORUFI10G11080.1
MCL	1	Red	87	OrBTB10.5	4529.ORUFI10G11090.1
MCL	1	Red	87	OrBTB10.6	4529.ORUFI10G11100.2
MCL	1	Red	87	OrBTB10.7	4529.ORUFI10G11140.1
MCL	1	Red	87	OrBTB10.8	4529.ORUFI10G11150.1
MCL	1	Red	87	OrBTB10.9	4529.ORUFI10G11160.1
MCL	1	Red	87	OrBTB11.1	4529.ORUFI11G00700.1
MCL	1	Red	87	OrBTB11.10	4529.ORUFI11G22130.1
MCL	1	Red	87	OrBTB11.11	4529.ORUFI11G22170.1
MCL	1	Red	87	OrBTB11.12	4529.ORUFI11G24540.1
MCL	1	Red	87	OrBTB11.3	4529.ORUFI11G12230.1
MCL	1	Red	87	OrBTB11.4	4529.ORUFI11G21310.1
MCL	1	Red	87	OrBTB11.5	4529.ORUFI11G21540.1
MCL	1	Red	87	OrBTB11.6	4529.ORUFI11G21740.1
MCL	1	Red	87	OrBTB11.7	4529.ORUFI11G21760.1
MCL	1	Red	87	OrBTB11.8	4529.ORUFI11G22110.1
MCL	1	Red	87	OrBTB11.9	4529.ORUFI11G22120.1
MCL	1	Red	87	OrBTB12.1	4529.ORUFI12G00820.1
MCL	1	Red	87	OrBTB2.2	4529.ORUFI02G13980.1
MCL	1	Red	87	OrBTB2.3	4529.ORUFI02G14000.1
MCL	1	Red	87	OrBTB2.4	4529.ORUFI02G14020.1
MCL	1	Red	87	OrBTB2.5	4529.ORUFI02G14050.1
MCL	1	Red	87	OrBTB2.7	4529.ORUFI02G34930.1
MCL	1	Red	87	OrBTB3.5	4529.ORUFI03G29880.1
MCL	1	Red	87	OrBTB3.6	4529.ORUFI03G31230.1
MCL	1	Red	87	OrBTB3.7	4529.ORUFI03G38580.1
MCL	1	Red	87	OrBTB4.1	4529.ORUFI04G02660.1
MCL	1	Red	87	OrBTB4.2	4529.ORUFI04G02670.1
MCL	1	Red	87	OrBTB4.3	4529.ORUFI04G14290.1
MCL	1	Red	87	OrBTB4.5	4529.ORUFI04G27660.1
MCL	1	Red	87	OrBTB4.7	4529.ORUFI04G29880.1
MCL	1	Red	87	OrBTB5.1	4529.ORUFI05G13500.2
MCL	1	Red	87	OrBTB5.3	4529.ORUFI05G24530.1
MCL	1	Red	87	OrBTB5.4	4529.ORUFI05G24550.1
MCL	1	Red	87	OrBTB6.2	4529.ORUFI06G09880.1
MCL	1	Red	87	OrBTB6.5	4529.ORUFI06G25930.1
MCL	1	Red	87	OrBTB6.6	4529.ORUFI06G25940.1
MCL	1	Red	87	OrBTB6.7	4529.ORUFI06G25950.1
MCL	1	Red	87	OrBTB7.1	4529.ORUFI07G00140.1
MCL	1	Red	87	OrBTB7.3	4529.ORUFI07G04060.1
MCL	1	Red	87	OrBTB7.4	4529.ORUFI07G09430.1
MCL	1	Red	87	OrBTB7.5	4529.ORUFI07G25720.1
MCL	1	Red	87	OrBTB8.1	4529.ORUFI08G00320.1
MCL	1	Red	87	OrBTB8.10	4529.ORUFI08G07550.1
MCL	1	Red	87	OrBTB8.11	4529.ORUFI08G07560.1
MCL	1	Red	87	OrBTB8.12	4529.ORUFI08G07610.1
MCL	1	Red	87	OrBTB8.13	4529.ORUFI08G07650.1
MCL	1	Red	87	OrBTB8.14	4529.ORUFI08G12680.1
MCL	1	Red	87	OrBTB8.15	4529.ORUFI08G16010.1
MCL	1	Red	87	OrBTB8.16	4529.ORUFI08G16020.1
MCL	1	Red	87	OrBTB8.17	4529.ORUFI08G16050.1
MCL	1	Red	87	OrBTB8.18	4529.ORUFI08G21400.1
MCL	1	Red	87	OrBTB8.19	4529.ORUFI08G22900.1
MCL	1	Red	87	OrBTB8.2	4529.ORUFI08G02030.1
MCL	1	Red	87	OrBTB8.20	4529.ORUFI08G22910.1
MCL	1	Red	87	OrBTB8.21	4529.ORUFI08G22920.1
MCL	1	Red	87	OrBTB8.22	4529.ORUFI08G22930.1
MCL	1	Red	87	OrBTB8.23	4529.ORUFI08G23440.1
MCL	1	Red	87	OrBTB8.24	4529.ORUFI08G23450.1
MCL	1	Red	87	OrBTB8.3	4529.ORUFI08G02060.1
MCL	1	Red	87	OrBTB8.5	4529.ORUFI08G06330.1
MCL	1	Red	87	OrBTB8.6	4529.ORUFI08G07460.1
MCL	1	Red	87	OrBTB8.7	4529.ORUFI08G07490.1
MCL	1	Red	87	OrBTB8.8	4529.ORUFI08G07520.1
MCL	1	Red	87	OrBTB8.9	4529.ORUFI08G07540.1
MCL	1	Red	87	OrBTB9.1	4529.ORUFI09G02090.1
MCL	1	Red	87	OrBTB9.2	4529.ORUFI09G06910.1
MCL	1	Red	87	OrBTB9.3	4529.ORUFI09G06920.1
MCL	2	Green	3	OrBTB11.2	4529.ORUFI11G02560.1
MCL	2	Green	3	OrBTB2.6	4529.ORUFI02G24050.1
MCL	2	Green	3	OrBTB4.4	4529.ORUFI04G17810.1
MCL	3	Blue	2	OrBTB1.4	4529.ORUFI01G46370.1
MCL	3	Blue	2	OrBTB6.3	4529.ORUFI06G13380.1
