# Supplementary material for: BTB/POZ proteins and their gene family in Oryza rufipogon: Novel genes and alleles from the progenitor of the domesticated japonica rice (O. sativa L.)
Source: Research Square preprint supplement (doi:10.21203/rs.3.rs-1918471/v2), 2022-09-26
Supplement: Supplementary file 11 [file 6fd1b998351f37a8ae6557ba.xlsx]

## Sheet: Sheet1
Supplementary Table S7: List of cis regulatory elements in the selected orthologous BTB/POZ genes
Transcript id	Staring location	Ending location	cis-regulatory elements
OrBTB4.7	502	511	TCA
OrBTB4.7	527	533	Myb
OrBTB4.7	861	867	G-box
OrBTB4.7	976	982	G-box
OrBTB4.7	988	994	G-box
OrBTB4.7	1154	1160	G-box
OrBTB4.7	1193	1199	G-box
OrBTB4.7	1316	1322	G-box
OrBTB4.7	1437	1443	G-box
OrBTB4.7	1834	1840	TCT-motif
OrBTB4.7	389	396	DRE
OrBTB4.7	1639	1648	TC-rich repeats
OrBTB4.7	1022	1027	STRE
OrBTB4.7	1181	1186	STRE
OrBTB4.7	1918	1923	STRE
OrBTB4.7	186	192	ARE
OrBTB4.7	808	814	ARE
OrBTB4.7	1024	1030	Sp1
OrBTB4.7	95	101	TGA-element
OrBTB4.7	1286	1292	TGA-element
OrBTB4.7	469	475	W box
OrBTB4.7	1053	1059	W box
OrBTB4.7	1798	1807	ATCT-motif
OrBTB4.7	861	867	ABRE
OrBTB4.7	976	982	ABRE
OrBTB4.7	1154	1160	ABRE
OrBTB4.7	1316	1322	ABRE
OrBTB4.7	1437	1443	ABRE
OrBTB4.7	1364	1372.5	O2-site
OrBTB4.7	862	867	ABRE
OrBTB4.7	977	982	ABRE
OrBTB4.7	1152	1161	ABRE
OrBTB4.7	1154	1159	ABRE
OrBTB4.7	1316	1321	ABRE
OrBTB4.7	1434	1444	ABRE
OrBTB4.7	1438	1443	ABRE
OrBTB4.7	1707	1712	ABRE
OrBTB4.7	1728	1733	ABRE
OrBTB4.7	1741	1746	ABRE
OrBTB4.7	1952	1961	ABRE
OrBTB4.7	289	296	P-box
OrBTB4.7	1152	1160	ABRE
OrBTB4.7	1678	1684	Myb
OrBTB4.7	1878	1886	RY-element
OrBTB4.7	1706	1712	G-Box
OrBTB4.7	1727	1733	G-Box
OrBTB4.7	1740	1746	G-Box
OrBTB4.7	155	161	GT1-motif
OrBTB4.7	1676	1683	GT1-motif
OrBTB4.7	1677	1683	GT1-motif
OrBTB4.7	861	867	ABRE
OrBTB4.7	976	982	ABRE
OrBTB4.7	1154	1160	ABRE
OrBTB4.7	1316	1322	ABRE
OrBTB4.7	1437	1443	ABRE
OrBTB4.7	1103	1112	ACE
OrBTB4.7	1152	1161	ACE
OrBTB4.7	1760	1767	AAGAA-motif
OrBTB4.7	530	536	Myb
OrBTB4.7	1149	1155	DRE
OrBTB4.7	1304	1310	DRE
OrBTB4.7	530	536	MYB
OrBTB4.7	1678	1684	MYB
KQJ85084	90	95	as-1
KQJ85084	93	98	as-1
KQJ85084	345	350	as-1
KQJ85084	438	443	as-1
KQJ85084	450	455	as-1
KQJ85084	553	558	as-1
KQJ85084	831	836	as-1
KQJ85084	855	860	as-1
KQJ85084	309	315	WRE3
KQJ85084	1636	1644.5	AC-I
KQJ85084	760	766	GC-motif
KQJ85084	113	119	Myb
KQJ85084	609	615	Myb
KQJ85084	725	731	Myb
KQJ85084	871	877	Myb
KQJ85084	255	262	AuxRR-core
KQJ85084	529	535	G-box
KQJ85084	747	756	G-box
KQJ85084	1015	1021	G-box
KQJ85084	1105	1111	G-box
KQJ85084	1129	1135	G-box
KQJ85084	1142	1148	G-box
KQJ85084	1261	1267	G-box
KQJ85084	355	360	STRE
KQJ85084	1194	1199	STRE
KQJ85084	1296	1301	STRE
KQJ85084	1142	1148	ABRE
KQJ85084	90	95	TGACG-motif
KQJ85084	93	98	TGACG-motif
KQJ85084	345	350	TGACG-motif
KQJ85084	438	443	TGACG-motif
KQJ85084	450	455	TGACG-motif
KQJ85084	553	558	TGACG-motif
KQJ85084	831	836	TGACG-motif
KQJ85084	855	860	TGACG-motif
KQJ85084	866	872	Sp1
KQJ85084	573	579	W box
KQJ85084	374	380	G-Box
KQJ85084	928	934	G-Box
KQJ85084	1105	1111	G-Box
KQJ85084	1129	1135	G-Box
KQJ85084	1261	1267	G-Box
KQJ85084	249	258	MSA-like
KQJ85084	375	380	ABRE
KQJ85084	530	535	ABRE
KQJ85084	554	563	ABRE
KQJ85084	928	933	ABRE
KQJ85084	1016	1021	ABRE
KQJ85084	1105	1111	ABRE
KQJ85084	1106	1111	ABRE
KQJ85084	1129	1135	ABRE
KQJ85084	1130	1135	ABRE
KQJ85084	1143	1148	ABRE
KQJ85084	1261	1267	ABRE
KQJ85084	1262	1267	ABRE
KQJ85084	1326	1335	ABRE
KQJ85084	1075	1084	O2-site
KQJ85084	1241	1250	O2-site
KQJ85084	794	800	Myb
KQJ85084	1049	1055	A-box
KQJ85084	1142	1148	ABRE
KQJ85084	1522	1528	Myb
KQJ85084	794	800	MYB
KQJ85084	1522	1528	MYB
KQJ85084	673	679	DRE
KQJ85084	1090	1096	DRE
KQJ85084	1546	1552	DRE
KQJ85084	1660	1666	DRE
OrBTB8.8	1767	1776	TCA
OrBTB8.8	1880	1890	AT-rich
OrBTB8.8	26	31	as-1
OrBTB8.8	49	54	as-1
OrBTB8.8	256	261	as-1
OrBTB8.8	721	726	as-1
OrBTB8.8	905	910	as-1
OrBTB8.8	1670	1675	as-1
OrBTB8.8	1781	1786	as-1
OrBTB8.8	553	559	GC-motif
OrBTB8.8	724	730	GC-motif
OrBTB8.8	1868	1874	GC-motif
OrBTB8.8	290	299	TCA
OrBTB8.8	844	850	G-box
OrBTB8.8	1153	1159	G-box
OrBTB8.8	1751	1757	G-box
OrBTB8.8	130	138	AE-box
OrBTB8.8	1931	1936	STRE
OrBTB8.8	338	344	MYC
OrBTB8.8	951	957	MYC
OrBTB8.8	1806	1812	MYC
OrBTB8.8	1936	1942	MYC
OrBTB8.8	26	31	TGACG-motif
OrBTB8.8	49	54	TGACG-motif
OrBTB8.8	256	261	TGACG-motif
OrBTB8.8	721	726	TGACG-motif
OrBTB8.8	905	910	TGACG-motif
OrBTB8.8	1670	1675	TGACG-motif
OrBTB8.8	1781	1786	TGACG-motif
OrBTB8.8	76	82	Sp1
OrBTB8.8	727	733	Sp1
OrBTB8.8	1956	1962	ARE
OrBTB8.8	345	351	W box
OrBTB8.8	1687	1696	ATCT-motif
OrBTB8.8	1154	1159	ABRE
OrBTB8.8	1751	1757	ABRE
OrBTB8.8	1752	1757	ABRE
OrBTB8.8	1744	1750	Myb
OrBTB8.8	1751	1757	G-Box
OrBTB8.8	562	570	CARE
OrBTB8.8	436	443	AAGAA-motif
OrBTB8.8	1885	1892	AAGAA-motif
OrBTB8.8	1744	1750	MYB
KQJ95656	1201	1207	G-Box
KQJ95656	463	470	P-box
KQJ95656	715	720	ABRE
KQJ95656	1132	1139	ABRE
KQJ95656	1201	1206	ABRE
KQJ95656	1533	1541	ERE
KQJ95656	1785	1793	ERE
KQJ95656	40	47	TCCC-motif
KQJ95656	162	167	TGACG-motif
KQJ95656	384	389	TGACG-motif
KQJ95656	390	395	TGACG-motif
KQJ95656	732	737	TGACG-motif
KQJ95656	900	905	TGACG-motif
KQJ95656	951	956	TGACG-motif
KQJ95656	1840	1846	ARE
KQJ95656	1508	1514	TGA-element
KQJ95656	1317	1323	W box
KQJ95656	1703	1709	W box
KQJ95656	994	1000	MBS
KQJ95656	1220	1226	MYB
KQJ95656	1476	1482	MYB
KQJ95656	1381	1387	DRE
KQJ95656	1639	1645	DRE
KQJ95656	1496	1505	AAGAA-motif
KQJ95656	1569	1578	AAGAA-motif
KQJ95656	350	359	I-box
KQJ95656	309	315	GC-motif
KQJ95656	162	167	as-1
KQJ95656	384	389	as-1
KQJ95656	390	395	as-1
KQJ95656	732	737	as-1
KQJ95656	900	905	as-1
KQJ95656	951	956	as-1
KQJ95656	23	29	WRE3
KQJ95656	149	155	WRE3
KQJ95656	72	77	STRE
KQJ95656	811	816	STRE
KQJ95656	860	865	STRE
KQJ95656	1987	1992	STRE
KQJ95656	1596	1605	TC-rich repeats
KQJ95656	800	808	dOCT
KQJ95656	715	721	G-box
KQJ95656	1070	1076	TCT-motif
KQJ95656	1410	1416	TCT-motif
KQJ95656	1600	1606	TCT-motif
KQJ95656	1610	1616	TCT-motif
KQJ95656	994	1000	Myb
KQJ95656	1774	1780	Myb
OrBTB8.20	1672	1677	ABRE
OrBTB8.20	566	575	O2-site
OrBTB8.20	1937	1942	TGACG-motif
OrBTB8.20	311	317	MYC
OrBTB8.20	832	838	MYC
OrBTB8.20	1223	1229	MYC
OrBTB8.20	1373	1379	MYC
OrBTB8.20	1703	1709	MYC
OrBTB8.20	1705	1711	MYC
OrBTB8.20	1993	1999	MYC
OrBTB8.20	1543	1549	TGA-element
OrBTB8.20	450	456	MYB
OrBTB8.20	1760	1766	DRE
OrBTB8.20	9	18	GATA-motif
OrBTB8.20	11	20	I-box
OrBTB8.20	1121	1127	A-box
OrBTB8.20	618	629	Y-box
OrBTB8.20	1883	1889	GC-motif
OrBTB8.20	1937	1942	as-1
OrBTB8.20	1790	1796	WRE3
OrBTB8.20	1840	1846	WRE3
OrBTB8.20	1780	1791	AC-II
OrBTB8.20	38	43	STRE
OrBTB8.20	905	910	STRE
OrBTB8.20	1809	1818	TCA
OrBTB8.20	1672	1678	G-box
OrBTB8.20	964	970	TCT-motif
PNT68446	1117	1123	GC-motif
PNT68446	1018	1024	Myb
PNT68446	572	581	NON
PNT68446	661	666	as-1
PNT68446	881	886	as-1
PNT68446	282	288	WRE3
PNT68446	304	310	WRE3
PNT68446	432	438	WRE3
PNT68446	610	616	WRE3
PNT68446	80	85	STRE
PNT68446	109	114	STRE
PNT68446	225	230	STRE
PNT68446	254	259	STRE
PNT68446	267	272	STRE
PNT68446	333	338	STRE
PNT68446	802	807	STRE
PNT68446	1106	1111	STRE
PNT68446	1127	1132	STRE
PNT68446	1266	1271	STRE
PNT68446	1883	1888	STRE
PNT68446	1970	1975	STRE
PNT68446	1982	1987	STRE
PNT68446	1710	1717	Myc
PNT68446	1719	1726	DRE
PNT68446	795	802	P-box
PNT68446	199	204	ABRE
PNT68446	419	428	ABRE
PNT68446	661	666	TGACG-motif
PNT68446	881	886	TGACG-motif
PNT68446	1700	1706	TGA-element
PNT68446	1066	1072	Sp1
PNT68446	1443	1449	ARE
PNT68446	70	76	MYB
PNT68446	1273	1279	MYB
PNT68446	1428	1434	MYB
PNT68446	1679	1685	MYB
PNT68446	1679	1685	Myb
PNT68446	803	810	GATA-motif
PNT68446	553	559	A-box
PNT68446	1146	1152	A-box
PNT68446	164	173	TC-rich repeats
PNT68446	907	915	dOCT
PNT68446	1292	1298	TCT-motif
PNT68446	198	204	G-box
PNT68446	914	920	Myb
PNT68446	1891	1901	NON
PNT68446	70	76	Myb
PNT68446	1428	1434	Myb
PNT68446	1488	1496	WUN-motif
PNT68446	1528	1537	WUN-motif
PNT68446	198	204	ABRE
PNT68446	914	920	MBS
PNT68446	152	158	MYC
PNT68446	184	190	MYC
PNT68446	469	475	MYC
PNT68446	1297	1303	MYC
PNT68446	1327	1333	MYC
PNT68446	289	295	DRE
PNT68446	981	987	DRE
PNT68446	1664	1670	DRE
PNT68446	1678	1685	GARE-motif
PNT68446	198	204	ABRE
OrBTB10.3	186	192	ABRE
OrBTB10.3	187	192	ABRE
OrBTB10.3	513	518	ABRE
OrBTB10.3	1693	1698	ABRE
OrBTB10.3	509	518	O2-site
OrBTB10.3	1263	1271	chs-CMA
OrBTB10.3	1165	1171	Myb
OrBTB10.3	186	192	G-Box
OrBTB10.3	548	554	GT1-motif
OrBTB10.3	1604	1611	GT1-motif
OrBTB10.3	1892	1898	Sp1
OrBTB10.3	1513	1519	ARE
OrBTB10.3	1978	1984	ARE
OrBTB10.3	43	48	TGACG-motif
OrBTB10.3	454	459	TGACG-motif
OrBTB10.3	661	667	MYC
OrBTB10.3	1509	1515	MYC
OrBTB10.3	1818	1824	MYC
OrBTB10.3	1982	1988	MYC
OrBTB10.3	59	68	ATCT-motif
OrBTB10.3	64	73	ATCT-motif
OrBTB10.3	512	518	ABRE
OrBTB10.3	517	524	AAGAA-motif
OrBTB10.3	837	844	AAGAA-motif
OrBTB10.3	1940	1947	AAGAA-motif
OrBTB10.3	404	410	MYB
OrBTB10.3	441	447	MYB
OrBTB10.3	1165	1171	MYB
OrBTB10.3	512	518	ABRE
OrBTB10.3	225	231	A-box
OrBTB10.3	995	1001	Myb
OrBTB10.3	1151	1159	chs-CMA
OrBTB10.3	1646	1655	TCA
OrBTB10.3	43	48	as-1
OrBTB10.3	454	459	as-1
OrBTB10.3	312	317	STRE
OrBTB10.3	1799	1804	STRE
OrBTB10.3	583	590	Myc
OrBTB10.3	551	557	Myb
OrBTB10.3	1569	1578	TCA
OrBTB10.3	1003	1009	TCT-motif
OrBTB10.3	1227	1233	TCT-motif
OrBTB10.3	1712	1718	TCT-motif
OrBTB10.3	186	192	G-box
OrBTB10.3	512	518	G-box
OrBTB10.3	1693	1699	G-box
KQJ96779	631	637	MYC
KQJ96779	655	661	MYC
KQJ96779	1092	1098	MYC
KQJ96779	216	221	TGACG-motif
KQJ96779	973	978	TGACG-motif
KQJ96779	222	228	Sp1
KQJ96779	460	466	Sp1
KQJ96779	1222	1228	ARE
KQJ96779	640	646	TGA-element
KQJ96779	1602	1608	TGA-element
KQJ96779	1345	1352	P-box
KQJ96779	1678	1685	P-box
KQJ96779	562	567	ABRE
KQJ96779	742	749	TCCC-motif
KQJ96779	561	567	G-Box
KQJ96779	1341	1347	GT1-motif
KQJ96779	1500	1506	GT1-motif
KQJ96779	1288	1298	GATA-motif
KQJ96779	32	39	AAGAA-motif
KQJ96779	107	113	MYB
KQJ96779	280	286	MYB
KQJ96779	1410	1416	MYB
KQJ96779	1483	1489	DRE
KQJ96779	277	283	WRE3
KQJ96779	538	544	WRE3
KQJ96779	216	221	as-1
KQJ96779	973	978	as-1
KQJ96779	948	957	GC-motif
KQJ96779	565	572	GCN4_motif
KQJ96779	291	296	STRE
KQJ96779	938	943	STRE
OrBTB11.6	1521	1527	Myb
OrBTB11.6	50	57	DRE
OrBTB11.6	157	167	G-box
OrBTB11.6	159	165	G-box
OrBTB11.6	194	202	G-box
OrBTB11.6	195	201	G-box
OrBTB11.6	831	837	G-box
OrBTB11.6	1573	1583	G-box
OrBTB11.6	1576	1582	G-box
OrBTB11.6	753	762	TC-rich repeats
OrBTB11.6	356	361	STRE
OrBTB11.6	383	388	STRE
OrBTB11.6	395	400	STRE
OrBTB11.6	471	476	STRE
OrBTB11.6	1100	1105	STRE
OrBTB11.6	1608	1613	STRE
OrBTB11.6	1640	1645	STRE
OrBTB11.6	1724	1729	STRE
OrBTB11.6	1891	1896	STRE
OrBTB11.6	1484	1494	3-AF1 binding site
OrBTB11.6	689	695	WRE3
OrBTB11.6	1325	1331	WRE3
OrBTB11.6	1331	1337	WRE3
OrBTB11.6	158	163	as-1
OrBTB11.6	391	396	as-1
OrBTB11.6	521	526	as-1
OrBTB11.6	730	735	as-1
OrBTB11.6	1266	1271	as-1
OrBTB11.6	1578	1583	as-1
OrBTB11.6	485	493	JERE
OrBTB11.6	1028	1034	Myb
OrBTB11.6	893	899	GC-motif
OrBTB11.6	195	201	ABRE
OrBTB11.6	831	837	ABRE
OrBTB11.6	1103	1111	CARE
OrBTB11.6	1366	1372	A-box
OrBTB11.6	1824	1831	AAGAA-motif
OrBTB11.6	1358	1364	Myb
OrBTB11.6	867	873	MYB
OrBTB11.6	1358	1364	MYB
OrBTB11.6	1834	1840	MYB
OrBTB11.6	898	904	DRE
OrBTB11.6	943	949	DRE
OrBTB11.6	158	163	TGACG-motif
OrBTB11.6	391	396	TGACG-motif
OrBTB11.6	521	526	TGACG-motif
OrBTB11.6	730	735	TGACG-motif
OrBTB11.6	1266	1271	TGACG-motif
OrBTB11.6	1578	1583	TGACG-motif
OrBTB11.6	206	212	MYC
OrBTB11.6	292	298	Sp1
OrBTB11.6	358	364	Sp1
OrBTB11.6	385	391	Sp1
OrBTB11.6	465	471	Sp1
OrBTB11.6	473	479	Sp1
OrBTB11.6	953	959	Sp1
OrBTB11.6	1379	1385	Sp1
OrBTB11.6	1893	1899	Sp1
OrBTB11.6	1508	1514	TGA-element
OrBTB11.6	80	86	ARE
OrBTB11.6	111	117	ARE
OrBTB11.6	795	801	ARE
OrBTB11.6	1200	1206	ARE
OrBTB11.6	1655	1661	ARE
OrBTB11.6	1521	1527	MBS
OrBTB11.6	195	201	ABRE
OrBTB11.6	831	837	ABRE
OrBTB11.6	160	165	ABRE
OrBTB11.6	196	201	ABRE
OrBTB11.6	831	836	ABRE
OrBTB11.6	1189	1198	ABRE
OrBTB11.6	1576	1581	ABRE
OrBTB11.6	867	873	Myb
OrBTB11.6	1063	1070	TCCC-motif
OrBTB11.6	1871	1880	WUN-motif
OrBTB11.6	764	772	ATC-motif
KQJ87842	67	73	G-Box
KQJ87842	245	251	G-Box
KQJ87842	1137	1143	G-Box
KQJ87842	796	803	TCCC-motif
KQJ87842	814	821	TCCC-motif
KQJ87842	932	939	TCCC-motif
KQJ87842	1054	1061	TCCC-motif
KQJ87842	1616	1623	TCCC-motif
KQJ87842	67	73	ABRE
KQJ87842	68	73	ABRE
KQJ87842	245	251	ABRE
KQJ87842	246	251	ABRE
KQJ87842	1137	1143	ABRE
KQJ87842	1138	1143	ABRE
KQJ87842	1589	1594	ABRE
KQJ87842	1759	1764	ABRE
KQJ87842	1979	1984	ABRE
KQJ87842	468	474	W box
KQJ87842	602	608	W box
KQJ87842	1879	1885	W box
KQJ87842	447	453	ARE
KQJ87842	1122	1128	ARE
KQJ87842	1309	1315	Sp1
KQJ87842	1848	1854	Sp1
KQJ87842	1756	1761	TGACG-motif
KQJ87842	1981	1986	TGACG-motif
KQJ87842	336	342	A-box
KQJ87842	1839	1848	ACE
KQJ87842	1026	1032	GC-motif
KQJ87842	1955	1961	GC-motif
KQJ87842	548	554	Myb
KQJ87842	1424	1430	Myb
KQJ87842	175	184	DRE
KQJ87842	1756	1761	as-1
KQJ87842	1981	1986	as-1
KQJ87842	1409	1415	WRE3
KQJ87842	704	709	STRE
KQJ87842	1032	1037	STRE
KQJ87842	1106	1111	STRE
KQJ87842	1115	1120	STRE
KQJ87842	1307	1312	STRE
KQJ87842	112	120	AE-box
KQJ87842	721	728	GT1-motif
KQJ87842	722	728	GT1-motif
KQJ87842	1589	1595	ABRE
KQJ87842	251	257	MYC
KQJ87842	263	269	MYC
KQJ87842	1196	1202	MYC
KQJ87842	1237	1243	MYC
KQJ87842	1021	1027	DRE
KQJ87842	1398	1404	DRE
KQJ87842	1927	1933	DRE
KQJ87842	366	373	AAGAA-motif
KQJ87842	1589	1595	ABRE
KQJ87842	1136	1144	ABRE
KQJ87842	65	74	G-box
KQJ87842	67	73	G-box
KQJ87842	245	251	G-box
KQJ87842	1135	1144	G-box
KQJ87842	1137	1143	G-box
KQJ87842	1589	1595	G-box
KQJ87842	1759	1765	G-box
KQJ87842	1979	1985	G-box
KQJ87842	1710	1716	TCT-motif
KQJ87842	958	966	dOCT
OrBTB4.7	502	511	TCA
OrBTB4.7	527	533	Myb
OrBTB4.7	861	867	G-box
OrBTB4.7	976	982	G-box
OrBTB4.7	988	994	G-box
OrBTB4.7	1154	1160	G-box
OrBTB4.7	1193	1199	G-box
OrBTB4.7	1316	1322	G-box
OrBTB4.7	1437	1443	G-box
OrBTB4.7	1834	1840	TCT-motif
OrBTB4.7	389	396	DRE
OrBTB4.7	1639	1648	TC-rich repeats
OrBTB4.7	1022	1027	STRE
OrBTB4.7	1181	1186	STRE
OrBTB4.7	1918	1923	STRE
OrBTB4.7	186	192	ARE
OrBTB4.7	808	814	ARE
OrBTB4.7	1024	1030	Sp1
OrBTB4.7	95	101	TGA-element
OrBTB4.7	1286	1292	TGA-element
OrBTB4.7	469	475	W box
OrBTB4.7	1053	1059	W box
OrBTB4.7	1798	1807	ATCT-motif
OrBTB4.7	861	867	ABRE
OrBTB4.7	976	982	ABRE
OrBTB4.7	1154	1160	ABRE
OrBTB4.7	1316	1322	ABRE
OrBTB4.7	1437	1443	ABRE
OrBTB4.7	1364	1372.5	O2-site
OrBTB4.7	862	867	ABRE
OrBTB4.7	977	982	ABRE
OrBTB4.7	1152	1161	ABRE
OrBTB4.7	1154	1159	ABRE
OrBTB4.7	1316	1321	ABRE
OrBTB4.7	1434	1444	ABRE
OrBTB4.7	1438	1443	ABRE
OrBTB4.7	1707	1712	ABRE
OrBTB4.7	1728	1733	ABRE
OrBTB4.7	1741	1746	ABRE
OrBTB4.7	1952	1961	ABRE
OrBTB4.7	289	296	P-box
OrBTB4.7	1152	1160	ABRE
OrBTB4.7	1678	1684	Myb
OrBTB4.7	1878	1886	RY-element
OrBTB4.7	1706	1712	G-Box
OrBTB4.7	1727	1733	G-Box
OrBTB4.7	1740	1746	G-Box
OrBTB4.7	155	161	GT1-motif
OrBTB4.7	1676	1683	GT1-motif
OrBTB4.7	1677	1683	GT1-motif
OrBTB4.7	861	867	ABRE
OrBTB4.7	976	982	ABRE
OrBTB4.7	1154	1160	ABRE
OrBTB4.7	1316	1322	ABRE
OrBTB4.7	1437	1443	ABRE
OrBTB4.7	1103	1112	ACE
OrBTB4.7	1152	1161	ACE
OrBTB4.7	1760	1767	AAGAA-motif
OrBTB4.7	530	536	Myb
OrBTB4.7	1149	1155	DRE
OrBTB4.7	1304	1310	DRE
OrBTB4.7	530	536	MYB
OrBTB4.7	1678	1684	MYB
EES11589	1339	1345	DRE
EES11589	1545	1551	DRE
EES11589	1633	1639	DRE
EES11589	1980	1986	DRE
EES11589	1347	1353	ABRE
EES11589	1555	1561	ABRE
EES11589	983	989	Myb
EES11589	1942	1950.5	MSA-like
EES11589	1940	1950	NON
EES11589	1969	1975	MBS
EES11589	149	155	MYC
EES11589	987	993	MYC
EES11589	1347	1353	ABRE
EES11589	1555	1561	ABRE
EES11589	1969	1975	Myb
EES11589	490	497	GCN4_motif
EES11589	215	221	G-box
EES11589	1096	1102	G-box
EES11589	1290	1296	G-box
EES11589	1347	1353	G-box
EES11589	1380	1386	G-box
EES11589	1383	1389	G-box
EES11589	1555	1561	G-box
EES11589	1938	1944	G-box
EES11589	542	549	GATA-motif
EES11589	983	989	MYB
EES11589	1579	1585	MYB
EES11589	1579	1585	Myb
EES11589	1622	1628	A-box
EES11589	1247	1256	ABRE
EES11589	1250	1255	ABRE
EES11589	1290	1295	ABRE
EES11589	1347	1352	ABRE
EES11589	1384	1389	ABRE
EES11589	1556	1561	ABRE
EES11589	1859	1864	ABRE
EES11589	1697	1705	plant_AP-2-like
EES11589	5	14	circadian
EES11589	1249	1255	G-Box
EES11589	1858	1864	G-Box
EES11589	1132	1138	W box
EES11589	1464	1470	TGA-element
EES11589	1791	1797	TGA-element
EES11589	1830	1836	TGA-element
EES11589	1994	2000	Sp1
EES11589	991	996	TGACG-motif
EES11589	1242	1247	TGACG-motif
EES11589	1803	1808	TGACG-motif
EES11589	248	253	STRE
EES11589	450	457	AuxRR-core
EES11589	466	475	TCA
EES11589	1945	1951	Myb
EES11589	1502	1511	GC-motif
EES11589	991	996	as-1
EES11589	1242	1247	as-1
EES11589	1803	1808	as-1
OrBTB6.6	624	630	MYB
OrBTB6.6	1223	1229	MYB
OrBTB6.6	1477	1483	MYB
OrBTB6.6	1477	1483	Myb
OrBTB6.6	1360	1366	A-box
OrBTB6.6	1652	1658	A-box
OrBTB6.6	1351	1357	G-Box
OrBTB6.6	296	304	ERE
OrBTB6.6	1021	1026	ABRE
OrBTB6.6	1192	1197	ABRE
OrBTB6.6	1352	1357	ABRE
OrBTB6.6	1583	1592	ABRE
OrBTB6.6	1757	1766	ABRE
OrBTB6.6	1760	1765	ABRE
OrBTB6.6	1828	1833	ABRE
OrBTB6.6	1020	1029	O2-site
OrBTB6.6	1191	1200	O2-site
OrBTB6.6	1023	1028	TGACG-motif
OrBTB6.6	1949	1954	TGACG-motif
OrBTB6.6	1068	1074	Sp1
OrBTB6.6	1095	1101	ARE
OrBTB6.6	725	730	STRE
OrBTB6.6	1887	1892	STRE
OrBTB6.6	728	735	AuxRR-core
OrBTB6.6	857	866	TCA
OrBTB6.6	904	913	TCA
OrBTB6.6	1750	1759	GC-motif
OrBTB6.6	398	404	Myb
OrBTB6.6	612	618	Myb
OrBTB6.6	1807	1815	OCT
OrBTB6.6	1023	1028	as-1
OrBTB6.6	1949	1954	as-1
OrBTB6.6	735	744	TCA
OrBTB6.6	1677	1683	WRE3
OrBTB6.6	1611	1617	DRE
OrBTB6.6	1941	1947	DRE
OrBTB6.6	275	282	AAGAA-motif
OrBTB6.6	1477	1484	GARE-motif
OrBTB6.6	656	664	CARE
OrBTB6.6	823	831	CARE
OrBTB6.6	1759	1765	ABRE
OrBTB6.6	1828	1834	ABRE
OrBTB6.6	780	789	WUN-motif
OrBTB6.6	1759	1765	ABRE
OrBTB6.6	1828	1834	ABRE
OrBTB6.6	392	398	MBS
OrBTB6.6	628	634	MYC
OrBTB6.6	1021	1027	G-box
OrBTB6.6	1192	1198	G-box
OrBTB6.6	1759	1765	G-box
OrBTB6.6	1827	1835	G-box
OrBTB6.6	1828	1834	G-box
OrBTB6.6	1835	1841	G-box
OrBTB6.6	392	398	Myb
KXG20566	5	10	as-1
KXG20566	94	100	WRE3
KXG20566	205	211	WRE3
KXG20566	485	491	WRE3
KXG20566	335	341	Myb
KXG20566	344	350	Myb
KXG20566	925	932	DRE
KXG20566	61	68	AuxRR-core
KXG20566	1919	1925	G-box
KXG20566	1562	1568	TCT-motif
KXG20566	1662	1668	TCT-motif
KXG20566	726	735	CTAG-motif
KXG20566	79	88	TCA
KXG20566	1071	1077	Myb
KXG20566	379	386	MRE
KXG20566	104	110	MYC
KXG20566	746	752	MYC
KXG20566	802	808	MYC
KXG20566	976	982	MYC
KXG20566	1603	1609	MYC
KXG20566	1725	1731	MYC
KXG20566	5	10	TGACG-motif
KXG20566	282	288	Sp1
KXG20566	231	237	ARE
KXG20566	291	297	ARE
KXG20566	1919	1925	G-Box
KXG20566	1170	1178	ERE
KXG20566	1197	1206	WUN-motif
KXG20566	1919	1925	ABRE
KXG20566	1920	1925	ABRE
KXG20566	113	122	O2-site
KXG20566	150	159	O2-site
KXG20566	464	473	O2-site
KXG20566	516	524	CARE
KXG20566	1674	1680	MYB
KXG20566	891	900	AAGAA-motif
KXG20566	75	85	I-box
KXG20566	273	280	GATA-motif
OrBTB8.8	1767	1776	TCA
OrBTB8.8	1880	1890	AT-rich
OrBTB8.8	26	31	as-1
OrBTB8.8	49	54	as-1
OrBTB8.8	256	261	as-1
OrBTB8.8	721	726	as-1
OrBTB8.8	905	910	as-1
OrBTB8.8	1670	1675	as-1
OrBTB8.8	1781	1786	as-1
OrBTB8.8	553	559	GC-motif
OrBTB8.8	724	730	GC-motif
OrBTB8.8	1868	1874	GC-motif
OrBTB8.8	290	299	TCA
OrBTB8.8	844	850	G-box
OrBTB8.8	1153	1159	G-box
OrBTB8.8	1751	1757	G-box
OrBTB8.8	130	138	AE-box
OrBTB8.8	1931	1936	STRE
OrBTB8.8	338	344	MYC
OrBTB8.8	951	957	MYC
OrBTB8.8	1806	1812	MYC
OrBTB8.8	1936	1942	MYC
OrBTB8.8	26	31	TGACG-motif
OrBTB8.8	49	54	TGACG-motif
OrBTB8.8	256	261	TGACG-motif
OrBTB8.8	721	726	TGACG-motif
OrBTB8.8	905	910	TGACG-motif
OrBTB8.8	1670	1675	TGACG-motif
OrBTB8.8	1781	1786	TGACG-motif
OrBTB8.8	76	82	Sp1
OrBTB8.8	727	733	Sp1
OrBTB8.8	1956	1962	ARE
OrBTB8.8	345	351	W box
OrBTB8.8	1687	1696	ATCT-motif
OrBTB8.8	1154	1159	ABRE
OrBTB8.8	1751	1757	ABRE
OrBTB8.8	1752	1757	ABRE
OrBTB8.8	1744	1750	Myb
OrBTB8.8	1751	1757	G-Box
OrBTB8.8	562	570	CARE
OrBTB8.8	436	443	AAGAA-motif
OrBTB8.8	1885	1892	AAGAA-motif
OrBTB8.8	1744	1750	MYB
OQU80115	1239	1246	DRE
OQU80115	478	486	G-box
OQU80115	479	485	G-box
OQU80115	492	498	G-box
OQU80115	692	698	G-box
OQU80115	1113	1119	G-box
OQU80115	1357	1363	G-box
OQU80115	1925	1932	AuxRR-core
OQU80115	519	529	CTAG-motif
OQU80115	59	65	Myb
OQU80115	1760	1766	Myb
OQU80115	1878	1885	MRE
OQU80115	1092	1099	GCN4_motif
OQU80115	293	301	AE-box
OQU80115	816	821	STRE
OQU80115	824	829	STRE
OQU80115	1833	1838	STRE
OQU80115	1955	1960	STRE
OQU80115	177	182	as-1
OQU80115	1989	1994	as-1
OQU80115	1015	1021	WRE3
OQU80115	1983	1989	GC-motif
OQU80115	477	486	ACE
OQU80115	56	62	MYB
OQU80115	933	939	MYB
OQU80115	1740	1746	MYB
OQU80115	56	62	Myb
OQU80115	1740	1746	Myb
OQU80115	1020	1029	I-box
OQU80115	59	65	MBS
OQU80115	1760	1766	MBS
OQU80115	1161	1167	W box
OQU80115	177	182	TGACG-motif
OQU80115	1989	1994	TGACG-motif
OQU80115	1364	1370	ARE
OQU80115	1194	1201	GT1-motif
OQU80115	1221	1227	GT1-motif
OQU80115	1243	1250	GT1-motif
OQU80115	479	485	G-Box
OQU80115	492	498	G-Box
OQU80115	933	939	Myb
OQU80115	564	571	TCCC-motif
OQU80115	580	587	TCCC-motif
OQU80115	1110	1119	O2-site
OQU80115	477	486	ABRE
OQU80115	479	485	ABRE
OQU80115	480	485	ABRE
OQU80115	492	498	ABRE
OQU80115	493	498	ABRE
OQU80115	1357	1362	ABRE
OrBTB8.22	1251	1257	G-Box
OrBTB8.22	1169	1178	O2-site
OrBTB8.22	1251	1257	ABRE
OrBTB8.22	1252	1257	ABRE
OrBTB8.22	834	841	P-box
OrBTB8.22	1519	1526	P-box
OrBTB8.22	260	269	LAMP-element
OrBTB8.22	606	612	W box
OrBTB8.22	153	159	ARE
OrBTB8.22	571	577	ARE
OrBTB8.22	1262	1268	ARE
OrBTB8.22	716	722	Sp1
OrBTB8.22	1750	1756	Sp1
OrBTB8.22	1952	1958	TGA-element
OrBTB8.22	1108	1113	TGACG-motif
OrBTB8.22	1709	1714	TGACG-motif
OrBTB8.22	1969	1974	TGACG-motif
OrBTB8.22	66	72	MYC
OrBTB8.22	418	424	MYC
OrBTB8.22	1099	1105	MYC
OrBTB8.22	1113	1119	MYC
OrBTB8.22	1220	1226	MYC
OrBTB8.22	595	601	DRE
OrBTB8.22	961	967	DRE
OrBTB8.22	1151	1157	DRE
OrBTB8.22	609	615	MYB
OrBTB8.22	1194	1200	MYB
OrBTB8.22	1198	1204	MYB
OrBTB8.22	258	267	I-box
OrBTB8.22	260	269	GATA-motif
OrBTB8.22	1629	1638	ACE
OrBTB8.22	1138	1144	A-box
OrBTB8.22	1039	1045	GC-motif
OrBTB8.22	979	987	OCT
OrBTB8.22	1108	1113	as-1
OrBTB8.22	1709	1714	as-1
OrBTB8.22	1969	1974	as-1
OrBTB8.22	999	1007.5	AC-I
OrBTB8.22	568	574	WRE3
OrBTB8.22	998	1004	WRE3
OrBTB8.22	1229	1235	WRE3
OrBTB8.22	629	638	TCA
OrBTB8.22	460	465	STRE
OrBTB8.22	519	524	STRE
OrBTB8.22	679	684	STRE
OrBTB8.22	1283	1288	STRE
OrBTB8.22	1360	1365	STRE
OrBTB8.22	1380	1385	STRE
OrBTB8.22	1727	1732	STRE
OrBTB8.22	1532	1540	AE-box
OrBTB8.22	635	642	AuxRR-core
OrBTB8.22	1251	1257	G-box
OrBTB8.22	87	96	TCA
KXG25577	1816	1822	Myb
KXG25577	613	618	ABRE
KXG25577	942	948	ABRE
KXG25577	943	948	ABRE
KXG25577	1897	1902	ABRE
KXG25577	1575	1583	O2-site
KXG25577	261	267	GT1-motif
KXG25577	647	653	GT1-motif
KXG25577	1531	1537	GT1-motif
KXG25577	1817	1823	GT1-motif
KXG25577	612	618	G-Box
KXG25577	942	948	G-Box
KXG25577	1897	1903	G-Box
KXG25577	122	128	MBS
KXG25577	1877	1883	MBS
KXG25577	642	648	ARE
KXG25577	680	686	ARE
KXG25577	736	742	ARE
KXG25577	750	756	ARE
KXG25577	1809	1815	ARE
KXG25577	785	791	Sp1
KXG25577	1642	1648	Sp1
KXG25577	126	131	TGACG-motif
KXG25577	213	218	TGACG-motif
KXG25577	497	502	TGACG-motif
KXG25577	554	560	MYC
KXG25577	1861	1867	MYC
KXG25577	259	268	GATA-motif
KXG25577	393	400	GATA-motif
KXG25577	622	628	DRE
KXG25577	1355	1361	DRE
KXG25577	1840	1846	DRE
KXG25577	477	483	MYB
KXG25577	508	514	MYB
KXG25577	1003	1009	MYB
KXG25577	1015	1021	MYB
KXG25577	1684	1690	MYB
KXG25577	1816	1822	MYB
KXG25577	477	483	Myb
KXG25577	1003	1009	Myb
KXG25577	1015	1021	Myb
KXG25577	178	188	GTGGC-motif
KXG25577	815	825	GTGGC-motif
KXG25577	842	848	A-box
KXG25577	882	888	A-box
KXG25577	935	941	Myb
KXG25577	593	601	JERE
KXG25577	126	131	as-1
KXG25577	213	218	as-1
KXG25577	497	502	as-1
KXG25577	1940	1945	STRE
KXG25577	769	777	AE-box
KXG25577	122	128	Myb
KXG25577	1877	1883	Myb
KXG25577	1305	1312	GCN4_motif
KXG25577	825	831	G-box
KXG25577	942	948	G-box
KXG25577	1128	1134	G-box
KXG25577	1236	1242	G-box
KXG25577	1523	1529	G-box
KXG25577	1897	1905	G-box
KXG25577	1973	1979	G-box
OrBTB10.2	26	31	as-1
OrBTB10.2	596	601	as-1
OrBTB10.2	686	691	as-1
OrBTB10.2	1241	1246	as-1
OrBTB10.2	1652	1657	as-1
OrBTB10.2	842	850	dOCT
OrBTB10.2	450	456	G-box
OrBTB10.2	834	840	G-box
OrBTB10.2	1131	1137	G-box
OrBTB10.2	1384	1390	G-box
OrBTB10.2	1710	1716	G-box
OrBTB10.2	427	436	TCA
OrBTB10.2	1749	1755	Myb
OrBTB10.2	86	91	STRE
OrBTB10.2	1510	1515	STRE
OrBTB10.2	1781	1788	Myc
OrBTB10.2	1710	1716	ABRE
OrBTB10.2	1257	1266	ATCT-motif
OrBTB10.2	1262	1271	ATCT-motif
OrBTB10.2	1859	1865	MYC
OrBTB10.2	26	31	TGACG-motif
OrBTB10.2	596	601	TGACG-motif
OrBTB10.2	686	691	TGACG-motif
OrBTB10.2	1241	1246	TGACG-motif
OrBTB10.2	1652	1657	TGACG-motif
OrBTB10.2	584	592	plant_AP-2-like
OrBTB10.2	1746	1752	GT1-motif
OrBTB10.2	412	418	G-Box
OrBTB10.2	592	598	G-Box
OrBTB10.2	898	904	G-Box
OrBTB10.2	1131	1137	G-Box
OrBTB10.2	1384	1390	G-Box
OrBTB10.2	410	420	ABRE
OrBTB10.2	413	418	ABRE
OrBTB10.2	450	455	ABRE
OrBTB10.2	593	598	ABRE
OrBTB10.2	899	904	ABRE
OrBTB10.2	903	912	ABRE
OrBTB10.2	1131	1137	ABRE
OrBTB10.2	1132	1137	ABRE
OrBTB10.2	1384	1390	ABRE
OrBTB10.2	1385	1390	ABRE
OrBTB10.2	1711	1716	ABRE
OrBTB10.2	1707	1716	O2-site
OrBTB10.2	861	867	A-box
OrBTB10.2	1423	1429	A-box
OrBTB10.2	1710	1716	ABRE
OrBTB10.2	38	44	MYB
OrBTB10.2	73	79	MYB
OrBTB10.2	1602	1608	MYB
OrBTB10.2	1639	1645	MYB
OrBTB10.2	600	606	DRE
OrBTB10.2	954	960	DRE
OrBTB10.2	1192	1198	DRE
OrBTB10.2	38	44	Myb
OrBTB10.2	1715	1722	AAGAA-motif
EER94211	1702	1708	WRE3
EER94211	211	216	as-1
EER94211	1620	1625	as-1
EER94211	247	253	Myb
EER94211	1949	1955	Myb
EER94211	1409	1416	GCN4_motif
EER94211	19	26	MRE
EER94211	993	999	G-box
EER94211	312	321	TC-rich repeats
EER94211	669	674	STRE
EER94211	953	958	STRE
EER94211	999	1004	STRE
EER94211	1877	1882	STRE
EER94211	247	253	MBS
EER94211	1949	1955	MBS
EER94211	1560	1566	TGA-element
EER94211	898	904	MYC
EER94211	1525	1531	MYC
EER94211	1632	1638	MYC
EER94211	211	216	TGACG-motif
EER94211	1620	1625	TGACG-motif
EER94211	1959	1967	E2Fb
EER94211	361	370	WUN-motif
EER94211	30	37	TCCC-motif
EER94211	1098	1107	O2-site
EER94211	705	714	ABRE
EER94211	993	998	ABRE
EER94211	659	666	P-box
EER94211	1836	1843	GARE-motif
EER94211	762	769	AAGAA-motif
EER94211	857	864	GATA-motif
EER94211	935	942	GATA-motif
EER94211	1931	1938	GATA-motif
EER94211	1925	1931	DRE
EER94211	1973	1979	DRE
EER94211	276	282	MYB
EER94211	412	418	MYB
EER94211	652	658	MYB
EER94211	1836	1842	MYB
EER94211	1836	1842	Myb
OrBTB11.4	833	839	GT1-motif
OrBTB11.4	1877	1885	RY-element
OrBTB11.4	1457	1466	WUN-motif
OrBTB11.4	1458	1466	WUN-motif
OrBTB11.4	1477	1483	Myb
OrBTB11.4	47	54	ABRE
OrBTB11.4	55	60	ABRE
OrBTB11.4	70	75	ABRE
OrBTB11.4	327	332	ABRE
OrBTB11.4	532	537	ABRE
OrBTB11.4	989	994	ABRE
OrBTB11.4	1439	1444	ABRE
OrBTB11.4	54	60	ABRE
OrBTB11.4	326	332	ABRE
OrBTB11.4	1622	1628	MBS
OrBTB11.4	22	28	ARE
OrBTB11.4	451	457	ARE
OrBTB11.4	722	728	ARE
OrBTB11.4	1883	1889	ARE
OrBTB11.4	616	622	TGA-element
OrBTB11.4	417	422	TGACG-motif
OrBTB11.4	530	535	TGACG-motif
OrBTB11.4	621	626	TGACG-motif
OrBTB11.4	982	988	MYC
OrBTB11.4	1754	1760	MYC
OrBTB11.4	1875	1881	MYC
OrBTB11.4	95	101	MYB
OrBTB11.4	420	426	MYB
OrBTB11.4	1449	1455	MYB
OrBTB11.4	1477	1483	MYB
OrBTB11.4	95	101	Myb
OrBTB11.4	603	612	AAGAA-motif
OrBTB11.4	324	333	ACE
OrBTB11.4	1985	1995	GTGGC-motif
OrBTB11.4	54	60	ABRE
OrBTB11.4	326	332	ABRE
OrBTB11.4	1030	1036	GC-motif
OrBTB11.4	1367	1376	GC-motif
OrBTB11.4	1380	1386	GC-motif
OrBTB11.4	1682	1688	Myb
OrBTB11.4	1036	1045	NON
OrBTB11.4	417	422	as-1
OrBTB11.4	530	535	as-1
OrBTB11.4	621	626	as-1
OrBTB11.4	155	161	WRE3
OrBTB11.4	1298	1304	WRE3
OrBTB11.4	1796	1806	AT-rich
OrBTB11.4	407	412	STRE
OrBTB11.4	1051	1056	STRE
OrBTB11.4	1044	1051	Myc
OrBTB11.4	1863	1870	Myc
OrBTB11.4	54	60	G-box
OrBTB11.4	69	75	G-box
OrBTB11.4	326	332	G-box
OrBTB11.4	529	539	G-box
OrBTB11.4	531	537	G-box
OrBTB11.4	988	994	G-box
OrBTB11.4	1439	1445	G-box
OrBTB11.4	461	467	Myb
OrBTB11.4	1622	1628	Myb
EES08857	1156	1162	Myb
EES08857	873	879	DRE
EES08857	1142	1148	DRE
EES08857	497	503	MYB
EES08857	1156	1162	MYB
EES08857	1579	1585	MYB
EES08857	1927	1933	MYB
EES08857	1850	1856	ARE
EES08857	317	322	TGACG-motif
EES08857	168	174	MYC
EES08857	292	298	MYC
EES08857	424	430	MYC
EES08857	629	635	MYC
EES08857	697	703	MYC
EES08857	683	689	W box
EES08857	1010	1019	O2-site
EES08857	32	37	ABRE
EES08857	1503	1508	ABRE
EES08857	1867	1876	ABRE
EES08857	497	503	Myb
EES08857	1579	1585	Myb
EES08857	31	37	G-Box
EES08857	1503	1509	G-Box
EES08857	1475	1483	GA-motif
EES08857	1250	1257	MRE
EES08857	226	232	Myb
EES08857	417	423	Myb
EES08857	37	46	TCA
EES08857	1503	1511	G-box
EES08857	617	625	dOCT
EES08857	104	109	STRE
EES08857	867	872	STRE
EES08857	1824	1829	STRE
EES08857	1876	1881	STRE
EES08857	689	697	AE-box
EES08857	1727	1735.5	AC-I
EES08857	1512	1522	AT-rich
EES08857	317	322	as-1
EES08857	183	189	GC-motif
OrBTB1.2	1027	1036	TC-rich repeats
OrBTB1.2	49	54	STRE
OrBTB1.2	1249	1254	STRE
OrBTB1.2	1028	1035	Myc
OrBTB1.2	942	950	AE-box
OrBTB1.2	707	713	Myb
OrBTB1.2	855	861	Myb
OrBTB1.2	1000	1006	Myb
OrBTB1.2	1175	1181	Myb
OrBTB1.2	1116	1122	G-box
OrBTB1.2	1775	1784	G-box
OrBTB1.2	1776	1782	G-box
OrBTB1.2	1906	1912	G-box
OrBTB1.2	1929	1939.5	G-box
OrBTB1.2	1933	1941	G-box
OrBTB1.2	1934	1940	G-box
OrBTB1.2	1027	1033	TCT-motif
OrBTB1.2	1437	1445	dOCT
OrBTB1.2	1626	1632	WRE3
OrBTB1.2	980	989	TCA
OrBTB1.2	109	114	as-1
OrBTB1.2	888	893	as-1
OrBTB1.2	1841	1846	as-1
OrBTB1.2	1905	1910	as-1
OrBTB1.2	1297	1304	AAGAA-motif
OrBTB1.2	168	175	GARE-motif
OrBTB1.2	1400	1407	GARE-motif
OrBTB1.2	168	174	Myb
OrBTB1.2	1401	1407	Myb
OrBTB1.2	1426	1432	Myb
OrBTB1.2	1758	1764	DRE
OrBTB1.2	1810	1816	DRE
OrBTB1.2	84	90	MYB
OrBTB1.2	168	174	MYB
OrBTB1.2	596	602	MYB
OrBTB1.2	723	729	MYB
OrBTB1.2	1132	1138	MYB
OrBTB1.2	1401	1407	MYB
OrBTB1.2	1426	1432	MYB
OrBTB1.2	1116	1122	ABRE
OrBTB1.2	1116	1121	ABRE
OrBTB1.2	1774	1783	ABRE
OrBTB1.2	1776	1782	ABRE
OrBTB1.2	1777	1782	ABRE
OrBTB1.2	1907	1912	ABRE
OrBTB1.2	1932	1941	ABRE
OrBTB1.2	1934	1940	ABRE
OrBTB1.2	1935	1940	ABRE
OrBTB1.2	1776	1782	G-Box
OrBTB1.2	1934	1940	G-Box
OrBTB1.2	1266	1272	ARE
OrBTB1.2	1576	1582	ARE
OrBTB1.2	1631	1637	ARE
OrBTB1.2	731	737	TGA-element
OrBTB1.2	1678	1684	Sp1
OrBTB1.2	1687	1693	Sp1
OrBTB1.2	109	114	TGACG-motif
OrBTB1.2	888	893	TGACG-motif
OrBTB1.2	1841	1846	TGACG-motif
OrBTB1.2	1905	1910	TGACG-motif
OrBTB1.2	80	86	MYC
OrBTB1.2	126	132	MYC
OrBTB1.2	247	253	MYC
OrBTB1.2	592	598	MYC
OrBTB1.2	1865	1871	MYC
OrBTB1.2	707	713	MBS
OrBTB1.2	1000	1006	MBS
OrBTB1.2	1116	1122	ABRE
Os01g0893400	1101	1107	ABRE
Os01g0893400	1251	1257	ARE
Os01g0893400	1565	1571	ARE
Os01g0893400	1620	1626	ARE
Os01g0893400	1667	1673	Sp1
Os01g0893400	1676	1682	Sp1
Os01g0893400	716	722	TGA-element
Os01g0893400	65	71	MYC
Os01g0893400	111	117	MYC
Os01g0893400	232	238	MYC
Os01g0893400	577	583	MYC
Os01g0893400	1854	1860	MYC
Os01g0893400	94	99	TGACG-motif
Os01g0893400	873	878	TGACG-motif
Os01g0893400	1830	1835	TGACG-motif
Os01g0893400	1894	1899	TGACG-motif
Os01g0893400	692	698	MBS
Os01g0893400	985	991	MBS
Os01g0893400	1765	1771	G-Box
Os01g0893400	1923	1929	G-Box
Os01g0893400	1101	1106	ABRE
Os01g0893400	1763	1772	ABRE
Os01g0893400	1765	1771	ABRE
Os01g0893400	1766	1771	ABRE
Os01g0893400	1896	1901	ABRE
Os01g0893400	1921	1930	ABRE
Os01g0893400	1923	1929	ABRE
Os01g0893400	1924	1929	ABRE
Os01g0893400	1101	1107	ABRE
Os01g0893400	153	159	Myb
Os01g0893400	1382	1388	Myb
Os01g0893400	1415	1421	Myb
Os01g0893400	1747	1753	DRE
Os01g0893400	1799	1805	DRE
Os01g0893400	69	75	MYB
Os01g0893400	153	159	MYB
Os01g0893400	581	587	MYB
Os01g0893400	708	714	MYB
Os01g0893400	1117	1123	MYB
Os01g0893400	1382	1388	MYB
Os01g0893400	1415	1421	MYB
Os01g0893400	1389	1398	I-box
Os01g0893400	153	160	GARE-motif
Os01g0893400	1381	1388	GARE-motif
Os01g0893400	1280	1287	AAGAA-motif
Os01g0893400	94	99	as-1
Os01g0893400	873	878	as-1
Os01g0893400	1830	1835	as-1
Os01g0893400	1894	1899	as-1
Os01g0893400	1615	1621	WRE3
Os01g0893400	965	974	TCA
Os01g0893400	1101	1107	G-box
Os01g0893400	1764	1773	G-box
Os01g0893400	1765	1771	G-box
Os01g0893400	1895	1901	G-box
Os01g0893400	1918	1928.5	G-box
Os01g0893400	1922	1930	G-box
Os01g0893400	1923	1929	G-box
Os01g0893400	1012	1018	TCT-motif
Os01g0893400	1426	1434	dOCT
Os01g0893400	692	698	Myb
Os01g0893400	840	846	Myb
Os01g0893400	985	991	Myb
Os01g0893400	1160	1166	Myb
Os01g0893400	34	39	STRE
Os01g0893400	1234	1239	STRE
Os01g0893400	1013	1020	Myc
Os01g0893400	927	935	AE-box
Os01g0893400	1012	1021	TC-rich repeats
OrBTB1.3	1396	1402	A-box
OrBTB1.3	797	803	Myb
OrBTB1.3	1072	1078	Myb
OrBTB1.3	1356	1362	Myb
OrBTB1.3	707	713	MYB
OrBTB1.3	797	803	MYB
OrBTB1.3	916	922	MYB
OrBTB1.3	1072	1078	MYB
OrBTB1.3	1186	1192	MYB
OrBTB1.3	1356	1362	MYB
OrBTB1.3	1565	1571	MYB
OrBTB1.3	1964	1973	GATA-motif
OrBTB1.3	1898	1903	TGACG-motif
OrBTB1.3	1086	1092	ARE
OrBTB1.3	1122	1128	ARE
OrBTB1.3	1919	1925	ARE
OrBTB1.3	479	485	W box
OrBTB1.3	624	630	W box
OrBTB1.3	444	452	RY-element
OrBTB1.3	1155	1163	RY-element
OrBTB1.3	38	47	circadian
OrBTB1.3	1142	1147	ABRE
OrBTB1.3	1262	1267	ABRE
OrBTB1.3	1280	1285	ABRE
OrBTB1.3	1422	1427	ABRE
OrBTB1.3	1929	1934	ABRE
OrBTB1.3	1937	1942	ABRE
OrBTB1.3	855	864	TCA
OrBTB1.3	848	855	AuxRR-core
OrBTB1.3	191	196	STRE
OrBTB1.3	229	234	STRE
OrBTB1.3	574	579	STRE
OrBTB1.3	1238	1243	STRE
OrBTB1.3	1587	1592	STRE
OrBTB1.3	1898	1903	as-1
OrBTB1.3	1307	1313	WRE3
OrBTB1.3	1290	1296	GC-motif
OrBTB1.3	1330	1336	GC-motif
OrBTB1.3	1413	1419	GC-motif
OrBTB1.3	1929	1935	ABRE
OrBTB1.3	418	424	DRE
OrBTB1.3	1625	1631	DRE
OrBTB1.3	827	834	AAGAA-motif
OrBTB1.3	797	804	GARE-motif
OrBTB1.3	1072	1079	GARE-motif
OrBTB1.3	1929	1935	ABRE
OrBTB1.3	76	82	MYC
OrBTB1.3	203	209	MYC
OrBTB1.3	337	343	MYC
OrBTB1.3	1159	1165	MYC
OrBTB1.3	1020	1026	MBS
OrBTB1.3	1894	1900	MBS
OrBTB1.3	314	322	GA-motif
OrBTB1.3	541	549	ATC-motif
OrBTB1.3	183	189	GT1-motif
OrBTB1.3	582	589	GT1-motif
OrBTB1.3	583	589	GT1-motif
OrBTB1.3	719	725	GT1-motif
OrBTB1.3	707	713	Myb
OrBTB1.3	916	922	Myb
OrBTB1.3	1565	1571	Myb
OrBTB1.3	658	667	WUN-motif
OrBTB1.3	1201	1210	WUN-motif
OrBTB1.3	1717	1723	TCT-motif
OrBTB1.3	1142	1148	G-box
OrBTB1.3	1262	1268	G-box
OrBTB1.3	1280	1286	G-box
OrBTB1.3	1420	1429	G-box
OrBTB1.3	1422	1428	G-box
OrBTB1.3	1929	1935	G-box
OrBTB1.3	1937	1943	G-box
OrBTB1.3	1020	1026	Myb
OrBTB1.3	1894	1900	Myb
Os01g0908200	1832	1838	ABRE
Os01g0908200	276	282	DRE
Os01g0908200	1528	1534	DRE
Os01g0908200	685	692	AAGAA-motif
Os01g0908200	730	737	AAGAA-motif
Os01g0908200	655	662	GARE-motif
Os01g0908200	975	982	GARE-motif
Os01g0908200	1832	1838	ABRE
Os01g0908200	61	67	MYC
Os01g0908200	195	201	MYC
Os01g0908200	1062	1068	MYC
Os01g0908200	1984	1990	MYC
Os01g0908200	923	929	MBS
Os01g0908200	1797	1803	MBS
Os01g0908200	399	407	ATC-motif
Os01g0908200	172	180	GA-motif
Os01g0908200	41	47	GT1-motif
Os01g0908200	440	447	GT1-motif
Os01g0908200	441	447	GT1-motif
Os01g0908200	577	583	GT1-motif
Os01g0908200	516	525	WUN-motif
Os01g0908200	1104	1113	WUN-motif
Os01g0908200	565	571	Myb
Os01g0908200	819	825	Myb
Os01g0908200	1468	1474	Myb
Os01g0908200	1045	1051	G-box
Os01g0908200	1165	1171	G-box
Os01g0908200	1183	1189	G-box
Os01g0908200	1323	1332	G-box
Os01g0908200	1325	1331	G-box
Os01g0908200	1832	1838	G-box
Os01g0908200	1840	1846	G-box
Os01g0908200	1620	1626	TCT-motif
Os01g0908200	923	929	Myb
Os01g0908200	1797	1803	Myb
Os01g0908200	1299	1305	A-box
Os01g0908200	655	661	Myb
Os01g0908200	975	981	Myb
Os01g0908200	1259	1265	Myb
Os01g0908200	565	571	MYB
Os01g0908200	655	661	MYB
Os01g0908200	819	825	MYB
Os01g0908200	975	981	MYB
Os01g0908200	1089	1095	MYB
Os01g0908200	1259	1265	MYB
Os01g0908200	1468	1474	MYB
Os01g0908200	1867	1876	GATA-motif
Os01g0908200	989	995	ARE
Os01g0908200	1025	1031	ARE
Os01g0908200	1822	1828	ARE
Os01g0908200	1801	1806	TGACG-motif
Os01g0908200	337	343	W box
Os01g0908200	482	488	W box
Os01g0908200	302	310	RY-element
Os01g0908200	1058	1066	RY-element
Os01g0908200	1045	1050	ABRE
Os01g0908200	1165	1170	ABRE
Os01g0908200	1183	1188	ABRE
Os01g0908200	1325	1330	ABRE
Os01g0908200	1832	1837	ABRE
Os01g0908200	1840	1845	ABRE
Os01g0908200	758	767	TCA
Os01g0908200	751	758	AuxRR-core
Os01g0908200	49	54	STRE
Os01g0908200	87	92	STRE
Os01g0908200	432	437	STRE
Os01g0908200	1141	1146	STRE
Os01g0908200	1490	1495	STRE
Os01g0908200	1801	1806	as-1
Os01g0908200	1210	1216	WRE3
Os01g0908200	1951	1961	AT-rich
Os01g0908200	1193	1199	GC-motif
Os01g0908200	1233	1239	GC-motif
Os01g0908200	1316	1322	GC-motif
Os01g0908200	1903	1909	GC-motif
OrBTB1.4	248	254	Myb
OrBTB1.4	815	821	Myb
OrBTB1.4	166	173	GCN4_motif
OrBTB1.4	1078	1089	G-box
OrBTB1.4	1143	1154	G-box
OrBTB1.4	1227	1233	G-box
OrBTB1.4	1251	1261	G-box
OrBTB1.4	1253	1259	G-box
OrBTB1.4	1325	1331	G-box
OrBTB1.4	1403	1414	G-box
OrBTB1.4	1713	1722	TCA
OrBTB1.4	588	593	STRE
OrBTB1.4	662	667	STRE
OrBTB1.4	667	672	STRE
OrBTB1.4	766	771	STRE
OrBTB1.4	773	778	STRE
OrBTB1.4	805	810	STRE
OrBTB1.4	858	863	STRE
OrBTB1.4	904	909	STRE
OrBTB1.4	968	974	WRE3
OrBTB1.4	116	125	TCA
OrBTB1.4	465	470	as-1
OrBTB1.4	1226	1231	as-1
OrBTB1.4	1327	1332	as-1
OrBTB1.4	987	995	JERE
OrBTB1.4	194	201	GARE-motif
OrBTB1.4	51	60	I-box
OrBTB1.4	880	887	GATA-motif
OrBTB1.4	642	648	DRE
OrBTB1.4	195	201	MYB
OrBTB1.4	195	201	Myb
OrBTB1.4	248	254	MBS
OrBTB1.4	815	821	MBS
OrBTB1.4	438	444	W box
OrBTB1.4	1233	1239	TGA-element
OrBTB1.4	279	285	ARE
OrBTB1.4	1047	1053	ARE
OrBTB1.4	1063	1069	ARE
OrBTB1.4	1112	1118	ARE
OrBTB1.4	1128	1134	ARE
OrBTB1.4	1190	1196	ARE
OrBTB1.4	1362	1368	ARE
OrBTB1.4	1424	1430	ARE
OrBTB1.4	1506	1512	ARE
OrBTB1.4	986	992	Sp1
OrBTB1.4	380	386	MYC
OrBTB1.4	1574	1580	MYC
OrBTB1.4	465	470	TGACG-motif
OrBTB1.4	1226	1231	TGACG-motif
OrBTB1.4	1327	1332	TGACG-motif
OrBTB1.4	655	663	E2Fb
OrBTB1.4	1705	1713	WUN-motif
OrBTB1.4	52	61	O2-site
OrBTB1.4	435	444	O2-site
OrBTB1.4	1224	1233	O2-site
OrBTB1.4	1324	1333	O2-site
OrBTB1.4	1079	1088	ABRE
OrBTB1.4	1144	1153	ABRE
OrBTB1.4	1228	1233	ABRE
OrBTB1.4	1254	1259	ABRE
OrBTB1.4	1325	1330	ABRE
OrBTB1.4	1404	1413	ABRE
Os01g0932600	1974	1981	AAGAA-motif
Os01g0932600	1	8	GARE-motif
Os01g0932600	21	28	GATA-motif
Os01g0932600	687	694	GATA-motif
Os01g0932600	2	8	MYB
Os01g0932600	1765	1771	MYB
Os01g0932600	449	455	DRE
Os01g0932600	2	8	Myb
Os01g0932600	1493	1501	WUN-motif
Os01g0932600	882	891	ABRE
Os01g0932600	966	971	ABRE
Os01g0932600	992	997	ABRE
Os01g0932600	1086	1091	ABRE
Os01g0932600	1112	1117	ABRE
Os01g0932600	1191	1200	ABRE
Os01g0932600	242	251	O2-site
Os01g0932600	962	971	O2-site
Os01g0932600	991	1000	O2-site
Os01g0932600	1111	1120	O2-site
Os01g0932600	245	251	W box
Os01g0932600	55	61	MBS
Os01g0932600	622	628	MBS
Os01g0932600	272	277	TGACG-motif
Os01g0932600	805	810	TGACG-motif
Os01g0932600	964	969	TGACG-motif
Os01g0932600	994	999	TGACG-motif
Os01g0932600	1114	1119	TGACG-motif
Os01g0932600	187	193	MYC
Os01g0932600	1362	1368	MYC
Os01g0932600	1933	1939	MYC
Os01g0932600	86	92	ARE
Os01g0932600	381	387	ARE
Os01g0932600	850	856	ARE
Os01g0932600	866	872	ARE
Os01g0932600	928	934	ARE
Os01g0932600	1029	1035	ARE
Os01g0932600	1149	1155	ARE
Os01g0932600	1211	1217	ARE
Os01g0932600	1294	1300	ARE
Os01g0932600	793	799	Sp1
Os01g0932600	971	977	TGA-element
Os01g0932600	986	992	TGA-element
Os01g0932600	462	470	E2Fb
Os01g0932600	1688	1697	ATCT-motif
Os01g0932600	395	400	STRE
Os01g0932600	469	474	STRE
Os01g0932600	474	479	STRE
Os01g0932600	573	578	STRE
Os01g0932600	580	585	STRE
Os01g0932600	612	617	STRE
Os01g0932600	665	670	STRE
Os01g0932600	711	716	STRE
Os01g0932600	55	61	Myb
Os01g0932600	622	628	Myb
Os01g0932600	1939	1945	Myb
Os01g0932600	881	892	G-box
Os01g0932600	965	971	G-box
Os01g0932600	992	998	G-box
Os01g0932600	1083	1093	G-box
Os01g0932600	1086	1092	G-box
Os01g0932600	1112	1118	G-box
Os01g0932600	1190	1201	G-box
Os01g0932600	1501	1510	TCA
Os01g0932600	794	802	JERE
Os01g0932600	819	827	chs-CMA
Os01g0932600	775	781	WRE3
Os01g0932600	1989	1995	WRE3
Os01g0932600	272	277	as-1
Os01g0932600	805	810	as-1
Os01g0932600	964	969	as-1
Os01g0932600	994	999	as-1
Os01g0932600	1114	1119	as-1
OrBTB1.5	1585	1590	as-1
OrBTB1.5	1888	1893	as-1
OrBTB1.5	351	361	3-AF1 binding site
OrBTB1.5	1846	1855	TCA
OrBTB1.5	1771	1777	WRE3
OrBTB1.5	95	100	STRE
OrBTB1.5	440	445	STRE
OrBTB1.5	669	674	STRE
OrBTB1.5	1087	1092	STRE
OrBTB1.5	355	362	Myc
OrBTB1.5	728	735	Myc
OrBTB1.5	1450	1457	DRE
OrBTB1.5	1399	1406	AuxRR-core
OrBTB1.5	1376	1382	G-box
OrBTB1.5	1536	1542	G-box
OrBTB1.5	1470	1479	CTAG-motif
OrBTB1.5	1158	1164	Myb
OrBTB1.5	1261	1267	Myb
OrBTB1.5	1536	1542	G-Box
OrBTB1.5	606	614	RY-element
OrBTB1.5	1718	1727	circadian
OrBTB1.5	974	982	ERE
OrBTB1.5	579	587	WUN-motif
OrBTB1.5	712	720	WUN-motif
OrBTB1.5	257	264	TCCC-motif
OrBTB1.5	271	278	TCCC-motif
OrBTB1.5	1377	1382	ABRE
OrBTB1.5	1536	1542	ABRE
OrBTB1.5	1537	1542	ABRE
OrBTB1.5	1376	1382	ABRE
OrBTB1.5	1530	1536	W box
OrBTB1.5	1158	1164	MBS
OrBTB1.5	1585	1590	TGACG-motif
OrBTB1.5	1888	1893	TGACG-motif
OrBTB1.5	10	16	Sp1
OrBTB1.5	121	127	MYB
OrBTB1.5	504	510	MYB
OrBTB1.5	794	800	MYB
OrBTB1.5	1148	1154	MYB
OrBTB1.5	121	127	Myb
OrBTB1.5	1376	1382	ABRE
Os01g0948900	383	389	Sp1
Os01g0948900	983	989	MYC
Os01g0948900	1447	1453	MYC
Os01g0948900	468	473	TGACG-motif
Os01g0948900	1256	1261	TGACG-motif
Os01g0948900	1716	1722	W box
Os01g0948900	471	476	ABRE
Os01g0948900	109	116	TCCC-motif
Os01g0948900	123	130	TCCC-motif
Os01g0948900	1905	1912	TCCC-motif
Os01g0948900	1111	1117	Myb
Os01g0948900	471	477	G-Box
Os01g0948900	1846	1855	GT1-motif
Os01g0948900	567	575	plant_AP-2-like
Os01g0948900	1396	1402	A-box
Os01g0948900	1430	1436	A-box
Os01g0948900	1434	1440	A-box
Os01g0948900	1438	1444	A-box
Os01g0948900	1329	1336	AAGAA-motif
Os01g0948900	1607	1614	AAGAA-motif
Os01g0948900	1874	1881	AAGAA-motif
Os01g0948900	272	278	Myb
Os01g0948900	1940	1946	Myb
Os01g0948900	565	571	DRE
Os01g0948900	272	278	MYB
Os01g0948900	1107	1113	MYB
Os01g0948900	1111	1117	MYB
Os01g0948900	1940	1946	MYB
Os01g0948900	1370	1379	TCA
Os01g0948900	1382	1391	TCA
Os01g0948900	1880	1889	TCA
Os01g0948900	25	35	3-AF1 binding site
Os01g0948900	468	473	as-1
Os01g0948900	1256	1261	as-1
Os01g0948900	447	453	Myb
Os01g0948900	663	669	GC-motif
Os01g0948900	1504	1513	TCA
Os01g0948900	1507	1516	TCA
Os01g0948900	299	304	STRE
Os01g0948900	623	628	STRE
Os01g0948900	969	974	STRE
Os01g0948900	1957	1962	STRE
Os01g0948900	25	32	Myc
OrBTB8.2	301	307	Myb
OrBTB8.2	898	904	GC-motif
OrBTB8.2	1073	1079	GC-motif
OrBTB8.2	785	791	WRE3
OrBTB8.2	1315	1321	WRE3
OrBTB8.2	701	706	STRE
OrBTB8.2	736	741	STRE
OrBTB8.2	775	780	STRE
OrBTB8.2	796	801	STRE
OrBTB8.2	812	817	STRE
OrBTB8.2	1363	1369	Myb
OrBTB8.2	1953	1959	Myb
OrBTB8.2	403	409	G-box
OrBTB8.2	50	56	Myb
OrBTB8.2	375	381	Myb
OrBTB8.2	404	409	ABRE
OrBTB8.2	605	610	ABRE
OrBTB8.2	1	8	GT1-motif
OrBTB8.2	435	441	GT1-motif
OrBTB8.2	605	611	G-Box
OrBTB8.2	1266	1275	circadian
OrBTB8.2	1363	1369	MBS
OrBTB8.2	534	540	MYC
OrBTB8.2	1531	1537	MYC
OrBTB8.2	943	949	TGA-element
OrBTB8.2	1088	1094	TGA-element
OrBTB8.2	990	996	Sp1
OrBTB8.2	208	214	ARE
OrBTB8.2	423	429	ARE
OrBTB8.2	515	521	ARE
OrBTB8.2	1421	1427	ARE
OrBTB8.2	50	56	MYB
OrBTB8.2	106	112	MYB
OrBTB8.2	375	381	MYB
OrBTB8.2	972	978	MYB
OrBTB8.2	1034	1040	MYB
OrBTB8.2	1557	1563	MYB
OrBTB8.2	1993	1999	MYB
OrBTB8.2	765	771	DRE
OrBTB8.2	106	112	Myb
OrBTB8.2	1034	1040	Myb
OrBTB8.2	1993	1999	Myb
OrBTB8.2	963	971	CARE
OrBTB8.2	1049	1057	CARE
OrBTB8.2	1108	1116	CARE
OrBTB8.2	603	612	ACE
OrBTB8.2	841	847	A-box
OrBTB8.2	1020	1026	A-box
OrBTB8.2	1795	1801	A-box
Os08g0128700	1690	1695	ABRE
Os08g0128700	1892	1897	ABRE
Os08g0128700	394	401	P-box
Os08g0128700	1336	1342	Myb
Os08g0128700	1661	1667	Myb
Os08g0128700	532	540	RY-element
Os08g0128700	1892	1898	G-Box
Os08g0128700	1287	1294	GT1-motif
Os08g0128700	1721	1727	GT1-motif
Os08g0128700	967	973	Sp1
Os08g0128700	80	86	ARE
Os08g0128700	1494	1500	ARE
Os08g0128700	1709	1715	ARE
Os08g0128700	1803	1809	ARE
Os08g0128700	149	155	MYC
Os08g0128700	664	670	MYC
Os08g0128700	1215	1221	MYC
Os08g0128700	1740	1746	MYC
Os08g0128700	1822	1828	MYC
Os08g0128700	627	632	TGACG-motif
Os08g0128700	828	833	TGACG-motif
Os08g0128700	581	587	W box
Os08g0128700	64	73	AAGAA-motif
Os08g0128700	1392	1398	Myb
Os08g0128700	937	943	MYB
Os08g0128700	1336	1342	MYB
Os08g0128700	1392	1398	MYB
Os08g0128700	1661	1667	MYB
Os08g0128700	255	266	Y-box
Os08g0128700	648	656	CARE
Os08g0128700	849	855	A-box
Os08g0128700	1890	1899	ACE
Os08g0128700	467	473	Myb
Os08g0128700	1587	1593	Myb
Os08g0128700	1017	1023	GC-motif
Os08g0128700	627	632	as-1
Os08g0128700	828	833	as-1
Os08g0128700	127	134	Myc
Os08g0128700	56	61	STRE
Os08g0128700	61	66	STRE
Os08g0128700	277	282	STRE
Os08g0128700	446	451	STRE
Os08g0128700	455	460	STRE
Os08g0128700	482	487	STRE
Os08g0128700	1190	1195	STRE
Os08g0128700	1685	1690	STRE
Os08g0128700	1988	1993	STRE
Os08g0128700	589	595	G-box
Os08g0128700	906	912	G-box
Os08g0128700	1689	1695	G-box
Os08g0128700	505	512	AuxRR-core
OrBTB8.3	906	911	TGACG-motif
OrBTB8.3	1096	1101	TGACG-motif
OrBTB8.3	1890	1895	TGACG-motif
OrBTB8.3	192	198	MYC
OrBTB8.3	617	623	MYC
OrBTB8.3	1020	1026	Sp1
OrBTB8.3	1080	1086	Sp1
OrBTB8.3	1765	1771	Sp1
OrBTB8.3	220	226	ARE
OrBTB8.3	394	400	ARE
OrBTB8.3	490	496	ARE
OrBTB8.3	730	736	ARE
OrBTB8.3	763	769	TGA-element
OrBTB8.3	1121	1127	TGA-element
OrBTB8.3	1160	1166	TGA-element
OrBTB8.3	973	979	MBS
OrBTB8.3	450	456	W box
OrBTB8.3	1598	1604	G-Box
OrBTB8.3	466	474	ATC-motif
OrBTB8.3	1596	1605	ABRE
OrBTB8.3	1598	1603	ABRE
OrBTB8.3	1823	1832	ABRE
OrBTB8.3	1442	1451	WUN-motif
OrBTB8.3	1056	1062	A-box
OrBTB8.3	1276	1282	A-box
OrBTB8.3	1790	1799	ACE
OrBTB8.3	56	62	Myb
OrBTB8.3	102	108	Myb
OrBTB8.3	56	62	MYB
OrBTB8.3	102	108	MYB
OrBTB8.3	1849	1855	DRE
OrBTB8.3	1900	1906	DRE
OrBTB8.3	102	109	GARE-motif
OrBTB8.3	906	911	as-1
OrBTB8.3	1096	1101	as-1
OrBTB8.3	1890	1895	as-1
OrBTB8.3	1023	1029	GC-motif
OrBTB8.3	1084	1090	GC-motif
OrBTB8.3	1231	1237	GC-motif
OrBTB8.3	1805	1814	GC-motif
OrBTB8.3	639	646	DRE
OrBTB8.3	1500	1507	DRE
OrBTB8.3	1916	1923	DRE
OrBTB8.3	1731	1737	G-box
OrBTB8.3	1746	1752	G-box
OrBTB8.3	1870	1876	G-box
OrBTB8.3	248	254	Myb
OrBTB8.3	973	979	Myb
OrBTB8.3	216	221	STRE
OrBTB8.3	868	873	STRE
OrBTB8.3	1250	1255	STRE
OrBTB8.3	1280	1285	STRE
OrBTB8.3	1763	1768	STRE
Os08g0129300	924	930	Myb
Os08g0129300	962	968	Myb
Os08g0129300	1158	1164	Myb
Os08g0129300	1204	1210	Myb
Os08g0129300	310	316	MYB
Os08g0129300	519	525	MYB
Os08g0129300	924	930	MYB
Os08g0129300	962	968	MYB
Os08g0129300	1158	1164	MYB
Os08g0129300	1204	1210	MYB
Os08g0129300	163	173	GATA-motif
Os08g0129300	826	835	AAGAA-motif
Os08g0129300	962	969	GARE-motif
Os08g0129300	1204	1211	GARE-motif
Os08g0129300	365	373	LAMP-element
Os08g0129300	1294	1300	MYC
Os08g0129300	1754	1760	MYC
Os08g0129300	1900	1906	TGA-element
Os08g0129300	508	514	ARE
Os08g0129300	610	616	ARE
Os08g0129300	1322	1328	ARE
Os08g0129300	1533	1539	ARE
Os08g0129300	1629	1635	ARE
Os08g0129300	1867	1873	ARE
Os08g0129300	1589	1595	W box
Os08g0129300	768	774	MBS
Os08g0129300	1605	1613	ATC-motif
Os08g0129300	519	525	Myb
Os08g0129300	1055	1064	CTAG-motif
Os08g0129300	1776	1783	DRE
Os08g0129300	768	774	Myb
Os08g0129300	1350	1356	Myb
Os08g0129300	1148	1156	AE-box
Os08g0129300	938	943	STRE
Os08g0129300	1318	1323	STRE
OrBTB8.4	1322	1329	AAGAA-motif
OrBTB8.4	436	443	GARE-motif
OrBTB8.4	436	442	Myb
OrBTB8.4	436	442	MYB
OrBTB8.4	555	561	MYB
OrBTB8.4	1089	1095	MYB
OrBTB8.4	1328	1334	MYB
OrBTB8.4	1399	1405	MYB
OrBTB8.4	1960	1966	MYB
OrBTB8.4	456	462	ARE
OrBTB8.4	548	554	ARE
OrBTB8.4	576	582	ARE
OrBTB8.4	1926	1932	ARE
OrBTB8.4	1653	1659	MYC
OrBTB8.4	1426	1432	MBS
OrBTB8.4	1660	1668	LAMP-element
OrBTB8.4	1109	1114	ABRE
OrBTB8.4	324	331	P-box
OrBTB8.4	1294	1302	ERE
OrBTB8.4	1399	1405	Myb
OrBTB8.4	1960	1966	Myb
OrBTB8.4	1108	1114	G-Box
OrBTB8.4	1767	1773	GT1-motif
OrBTB8.4	308	316	ATC-motif
OrBTB8.4	423	430	MRE
OrBTB8.4	1841	1848	MRE
OrBTB8.4	1426	1432	Myb
OrBTB8.4	114	120	TCT-motif
OrBTB8.4	968	975	AuxRR-core
OrBTB8.4	1768	1777	TC-rich repeats
OrBTB8.4	652	657	STRE
OrBTB8.4	718	723	STRE
OrBTB8.4	808	813	STRE
OrBTB8.4	856	862	WRE3
OrBTB8.4	867	873	WRE3
OrBTB8.4	1354	1360	WRE3
OrBTB8.4	1210	1220	AT-rich
OrBTB8.4	170	176	GC-motif
Os08g0130600	1476	1483	AAGAA-motif
Os08g0130600	474	480	MYB
Os08g0130600	839	845	MYB
Os08g0130600	1400	1406	MYB
Os08g0130600	1471	1477	MYB
Os08g0130600	1711	1717	MYB
Os08g0130600	839	845	Myb
Os08g0130600	1400	1406	Myb
Os08g0130600	1503	1511	ERE
Os08g0130600	1692	1697	ABRE
Os08g0130600	1032	1038	GT1-motif
Os08g0130600	1692	1698	G-Box
Os08g0130600	309	315	MBS
Os08g0130600	1373	1379	MBS
Os08g0130600	577	583	W box
Os08g0130600	556	562	ARE
Os08g0130600	561	567	ARE
Os08g0130600	729	735	ARE
Os08g0130600	792	798	ARE
Os08g0130600	797	803	ARE
Os08g0130600	873	879	ARE
Os08g0130600	1146	1152	MYC
Os08g0130600	1137	1145	LAMP-element
Os08g0130600	1027	1036	TC-rich repeats
Os08g0130600	443	448	STRE
Os08g0130600	1992	1997	STRE
Os08g0130600	225	232	Myc
Os08g0130600	337	345	AE-box
Os08g0130600	309	315	Myb
Os08g0130600	320	326	Myb
Os08g0130600	1373	1379	Myb
Os08g0130600	957	964	MRE
Os08g0130600	1830	1837	AuxRR-core
Os08g0130600	1584	1594	AT-rich
Os08g0130600	1445	1451	WRE3
Os08g0130600	1932	1938	WRE3
Os08g0130600	1943	1949	WRE3
Os08g0130600	1	10	TCA
OrBTB8.19	1290	1300	3-AF3 binding site
OrBTB8.19	1057	1063	Myb
OrBTB8.19	1438	1444	Myb
OrBTB8.19	407	416	TCA
OrBTB8.19	1432	1441	TC-rich repeats
OrBTB8.19	23	29	WRE3
OrBTB8.19	215	221	WRE3
OrBTB8.19	390	396	WRE3
OrBTB8.19	604	610	WRE3
OrBTB8.19	1367	1373	WRE3
OrBTB8.19	120	125	as-1
OrBTB8.19	322	327	as-1
OrBTB8.19	513	518	as-1
OrBTB8.19	783	788	as-1
OrBTB8.19	962	967	as-1
OrBTB8.19	66	72	GC-motif
OrBTB8.19	281	287	GC-motif
OrBTB8.19	673	680	GARE-motif
OrBTB8.19	674	680	Myb
OrBTB8.19	545	551	MYB
OrBTB8.19	579	585	MYB
OrBTB8.19	674	680	MYB
OrBTB8.19	1186	1192	MYB
OrBTB8.19	426	432	ARE
OrBTB8.19	1445	1451	ARE
OrBTB8.19	120	125	TGACG-motif
OrBTB8.19	322	327	TGACG-motif
OrBTB8.19	513	518	TGACG-motif
OrBTB8.19	783	788	TGACG-motif
OrBTB8.19	962	967	TGACG-motif
OrBTB8.19	176	182	MYC
OrBTB8.19	933	939	MYC
OrBTB8.19	974	980	MYC
OrBTB8.19	1006	1012	MYC
OrBTB8.19	1152	1158	MYC
OrBTB8.19	1946	1952	W box
OrBTB8.19	1057	1063	MBS
OrBTB8.19	1525	1534	ATCT-motif
OrBTB8.19	390	399	O2-site
OrBTB8.19	793	802	O2-site
OrBTB8.19	545	551	Myb
OrBTB8.19	1186	1192	Myb
OrBTB8.19	830	838	ERE
OrBTB8.19	1769	1777	RY-element
OrBTB8.19	1171	1179	GA-motif
Os08g0516200	28	37	O2-site
Os08g0516200	1403	1412	O2-site
Os08g0516200	1808	1817	O2-site
Os08g0516200	1368	1376	ERE
Os08g0516200	1014	1020	Myb
Os08g0516200	1657	1663	Myb
Os08g0516200	429	437	RY-element
Os08g0516200	1027	1035	GA-motif
Os08g0516200	755	761	ARE
Os08g0516200	1776	1782	ARE
Os08g0516200	1239	1244	TGACG-motif
Os08g0516200	1418	1423	TGACG-motif
Os08g0516200	1690	1695	TGACG-motif
Os08g0516200	1881	1886	TGACG-motif
Os08g0516200	1048	1054	MYC
Os08g0516200	1194	1200	MYC
Os08g0516200	1226	1232	MYC
Os08g0516200	1267	1273	MYC
Os08g0516200	254	260	W box
Os08g0516200	85	91	MBS
Os08g0516200	1143	1149	MBS
Os08g0516200	671	680	ATCT-motif
Os08g0516200	1528	1535	GARE-motif
Os08g0516200	88	94	Myb
Os08g0516200	1528	1534	Myb
Os08g0516200	88	94	MYB
Os08g0516200	1014	1020	MYB
Os08g0516200	1528	1534	MYB
Os08g0516200	1623	1629	MYB
Os08g0516200	1657	1663	MYB
Os08g0516200	1921	1927	GC-motif
Os08g0516200	833	839	WRE3
Os08g0516200	1598	1604	WRE3
Os08g0516200	1812	1818	WRE3
Os08g0516200	1987	1993	WRE3
Os08g0516200	1239	1244	as-1
Os08g0516200	1418	1423	as-1
Os08g0516200	1690	1695	as-1
Os08g0516200	1881	1886	as-1
Os08g0516200	764	773	TC-rich repeats
Os08g0516200	905	915	3-AF3 binding site
Os08g0516200	85	91	Myb
Os08g0516200	762	768	Myb
[truncated: 1,219 more rows]
