# Supplementary material for: BTB/POZ proteins and their gene family in Oryza rufipogon: Novel genes and alleles from the progenitor of the domesticated japonica rice (O. sativa L.)
Source: Research Square preprint supplement (doi:10.21203/rs.3.rs-1918471/v2), 2022-09-26
Supplement: Supplementary file 12 [file 9c6a78cc8d5b48d5aace7310.xlsx]

## Sheet: Sheet1
Supplementary Table S1: Details of RT-qPCR primers used in the study
Gene	Ensembl id	Direction	Sequence 5' → 3'
OrBTB1.1	ORUFI01G35500.1	Forward	GCTTATCGCCAACGCTATGT
OrBTB1.1		Reverse	TGCACAGCTGCAATTACACA
OrBTB4.1	ORUFI04G02660.1	Forward	TCGTCGTCATCAACGAGTTC
OrBTB4.1		Reverse	CTTTTCGGTGTCGAGGAGAA
OrBTB7.1	ORUFI07G00140.1	Forward	GCGCTTCTACCGAAGATCAC
OrBTB7.1		Reverse	TCTTGACGACGCCTACAGTG
OrBTB8.1	ORUFI08G00320.1	Forward	AAAGGGTGCCTGACCTACCT
OrBTB8.1		Reverse	TGGAACATTTCCAGCATCAG
OrBTB11.2	ORUFI11G02560.1	Forward	AACTCGACGCTCATGTACCA
OrBTB11.2		Reverse	GAAGCCATTGGGGAAGTACA
OrBTB1.5	ORUFI01G47340.1	Forward	GTGAACCTGAGCTTGGACAAC
OrBTB1.5		Reverse	GAAGCCATGTGGGGAGAA
OrBTB3.3	ORUFI03G26720.1	Forward	CAGCGACATCAACAACAAGAG
OrBTB3.3		Reverse	GACGTGTCCGAGCTACTGTTC
OrBTB3.5	ORUFI03G29880.1	Forward	GGACAATCGTTACCTCGAGAA
OrBTB3.5		Reverse	TCTGACCCTCTTCTCATGCTC
OrBTB11.3	ORUFI11G12230.1	Forward	GCTGGAGGGTTCAGATCAAG
OrBTB11.3		Reverse	GGATTGATTCTTCCAGAGGAGA
Beta-tubulin(reference gene)		Forward	GCTGACCACACCTAGCTTTGG
		Reverse	AGGGAACCTTAGGCAGCATGT
