# Supplementary material for: BTB/POZ proteins and their gene family in Oryza rufipogon: Novel genes and alleles from the progenitor of the domesticated japonica rice (O. sativa L.)
Source: Research Square preprint supplement (doi:10.21203/rs.3.rs-1918471/v2), 2022-09-26
Supplement: Supplementary file 13 [file ad7f9f9b88fe3d3d0ce7fd9a.docx]

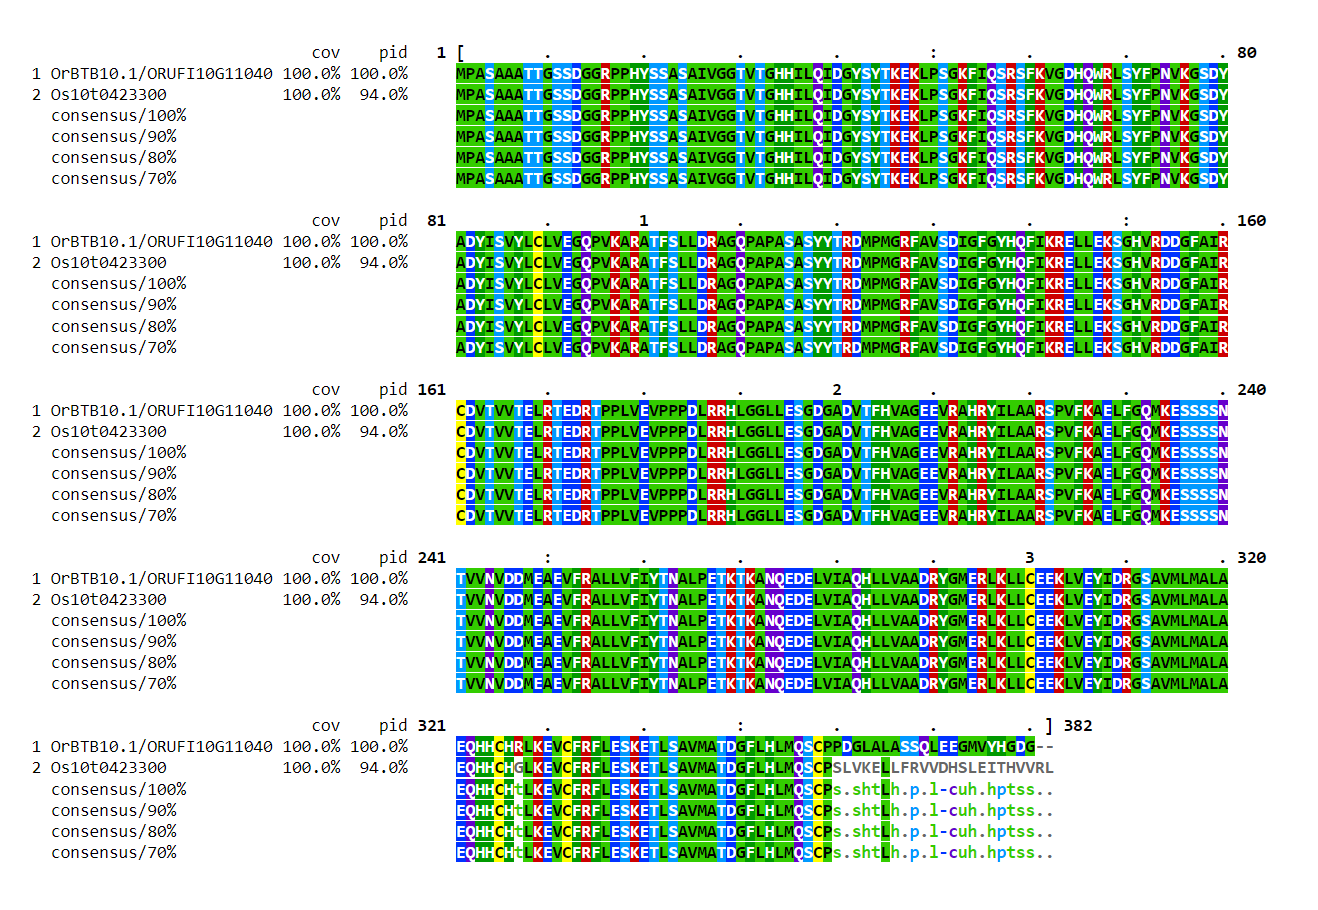


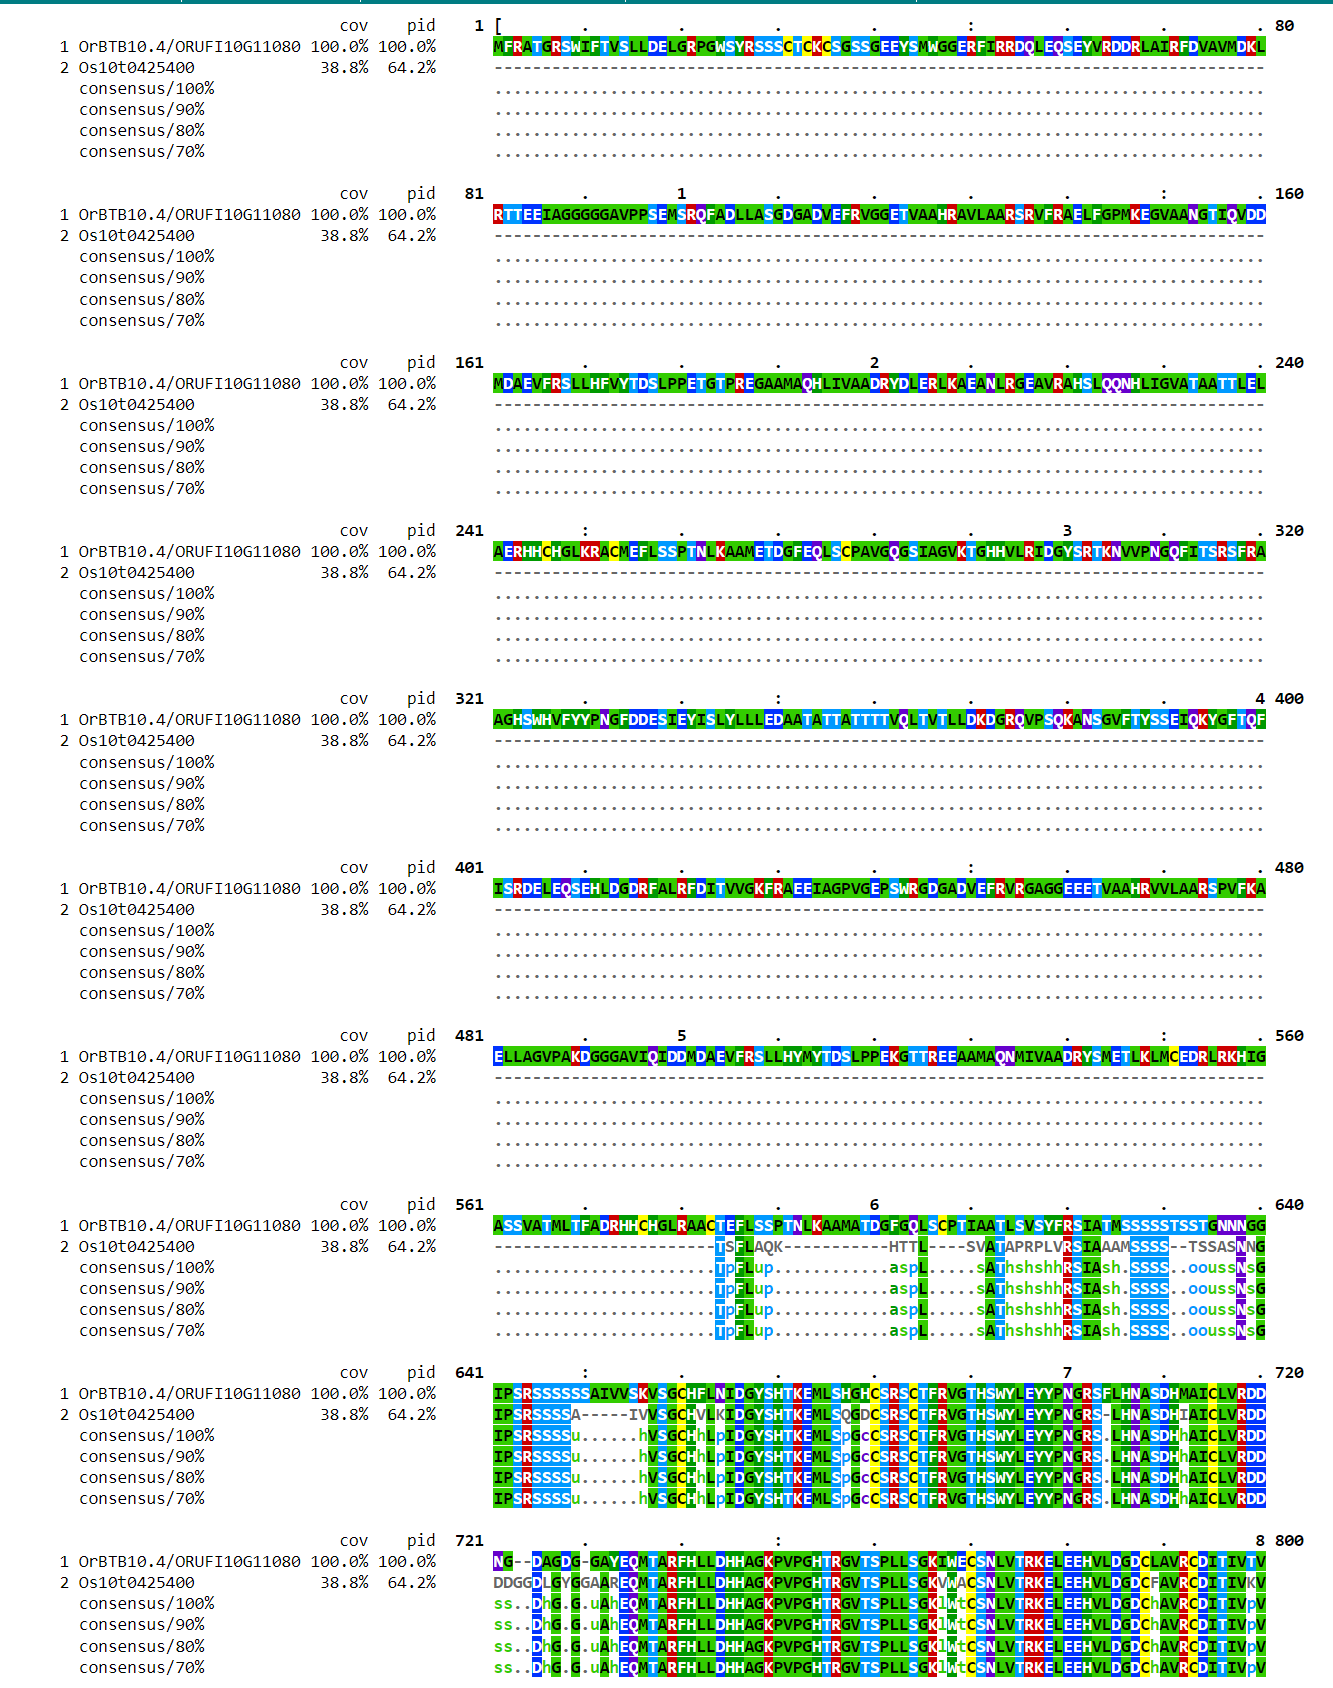


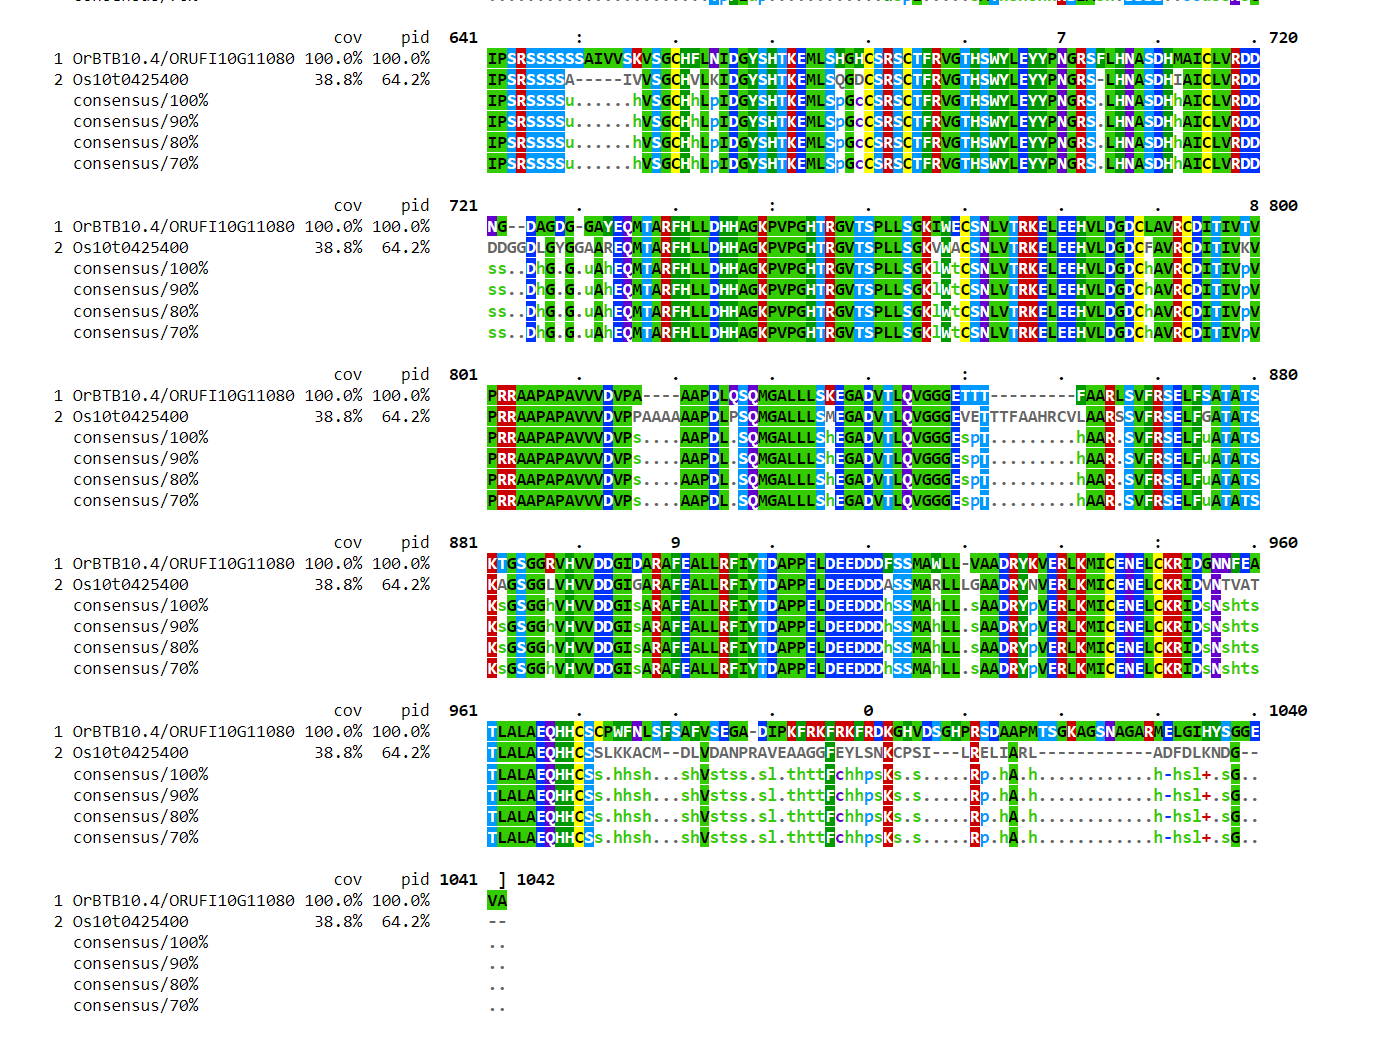


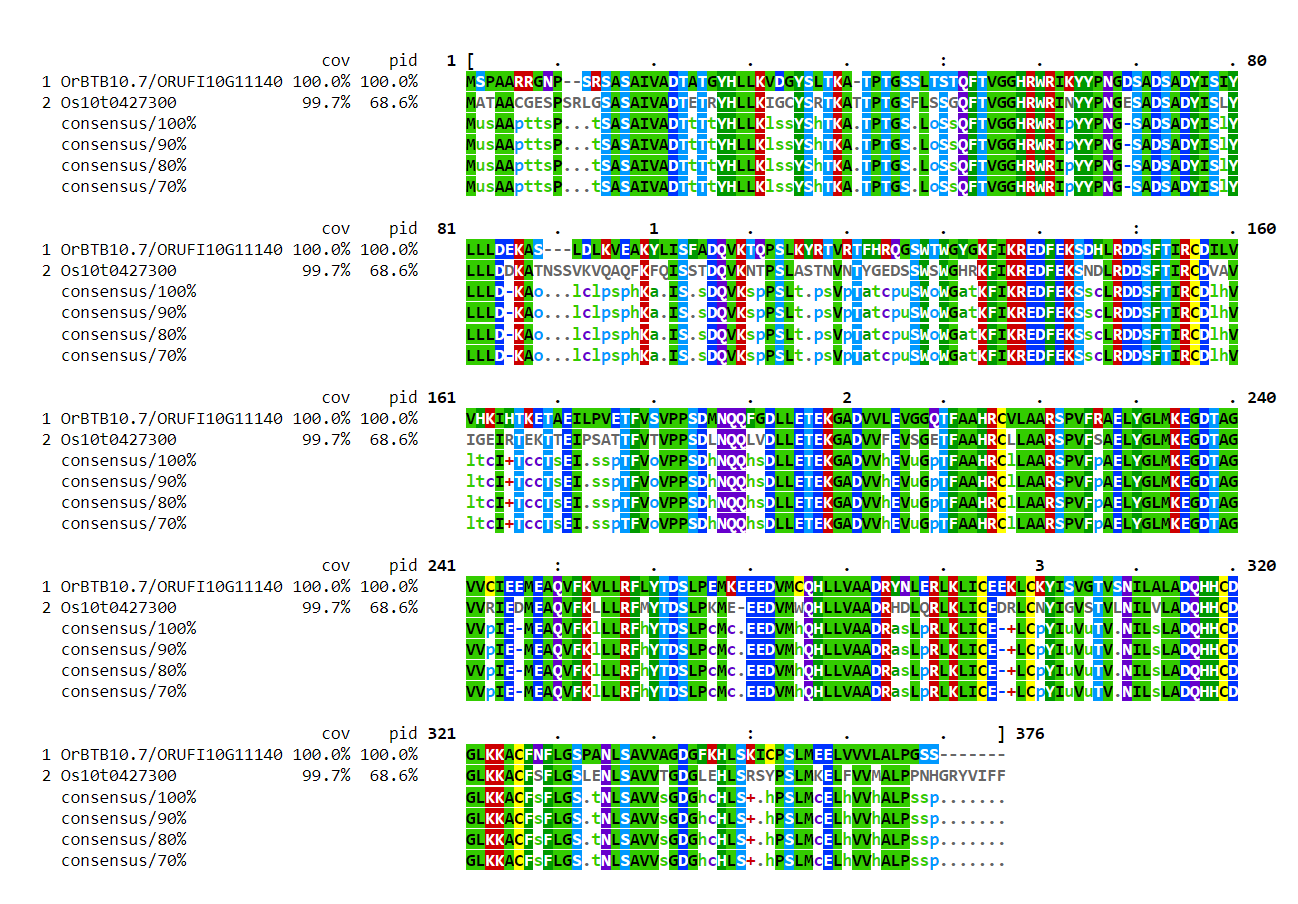


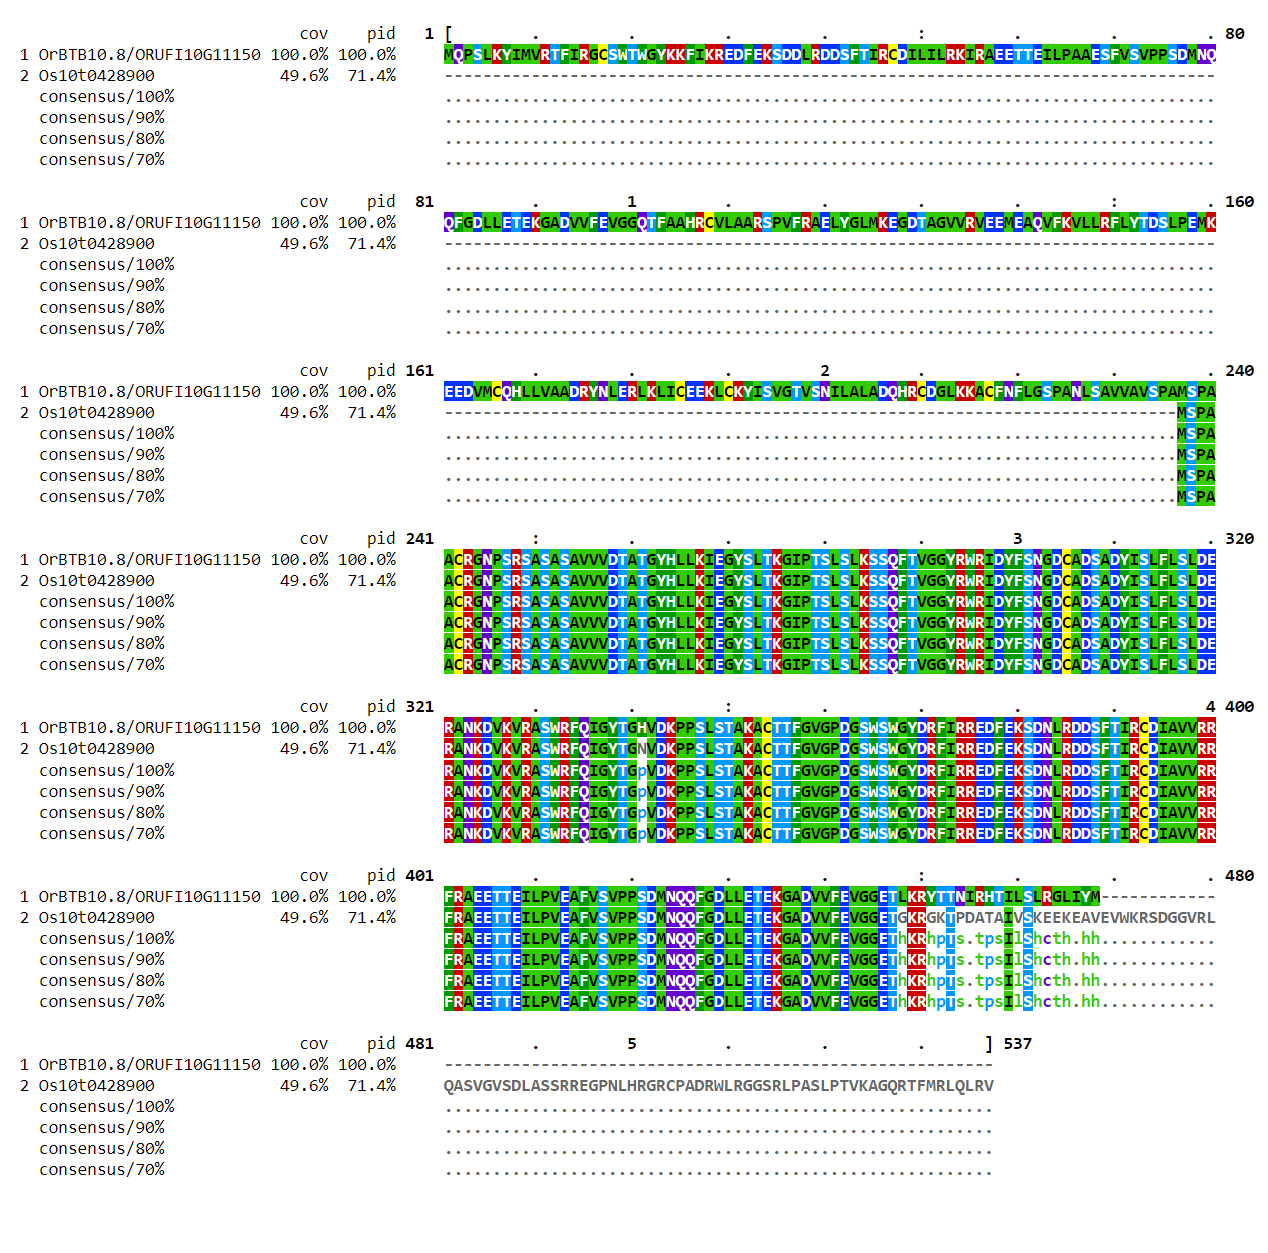


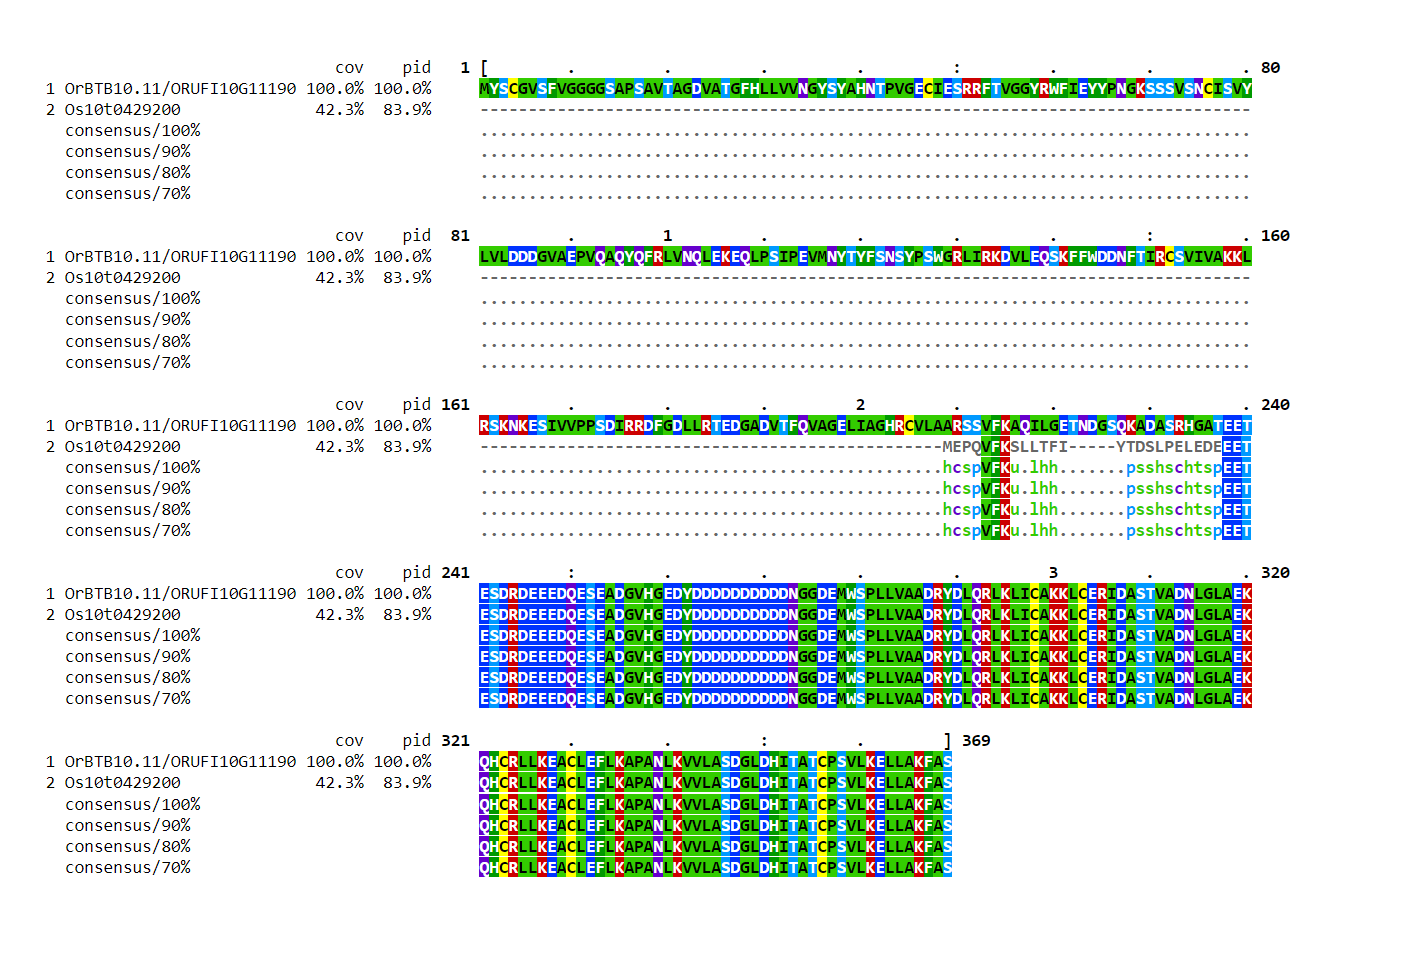


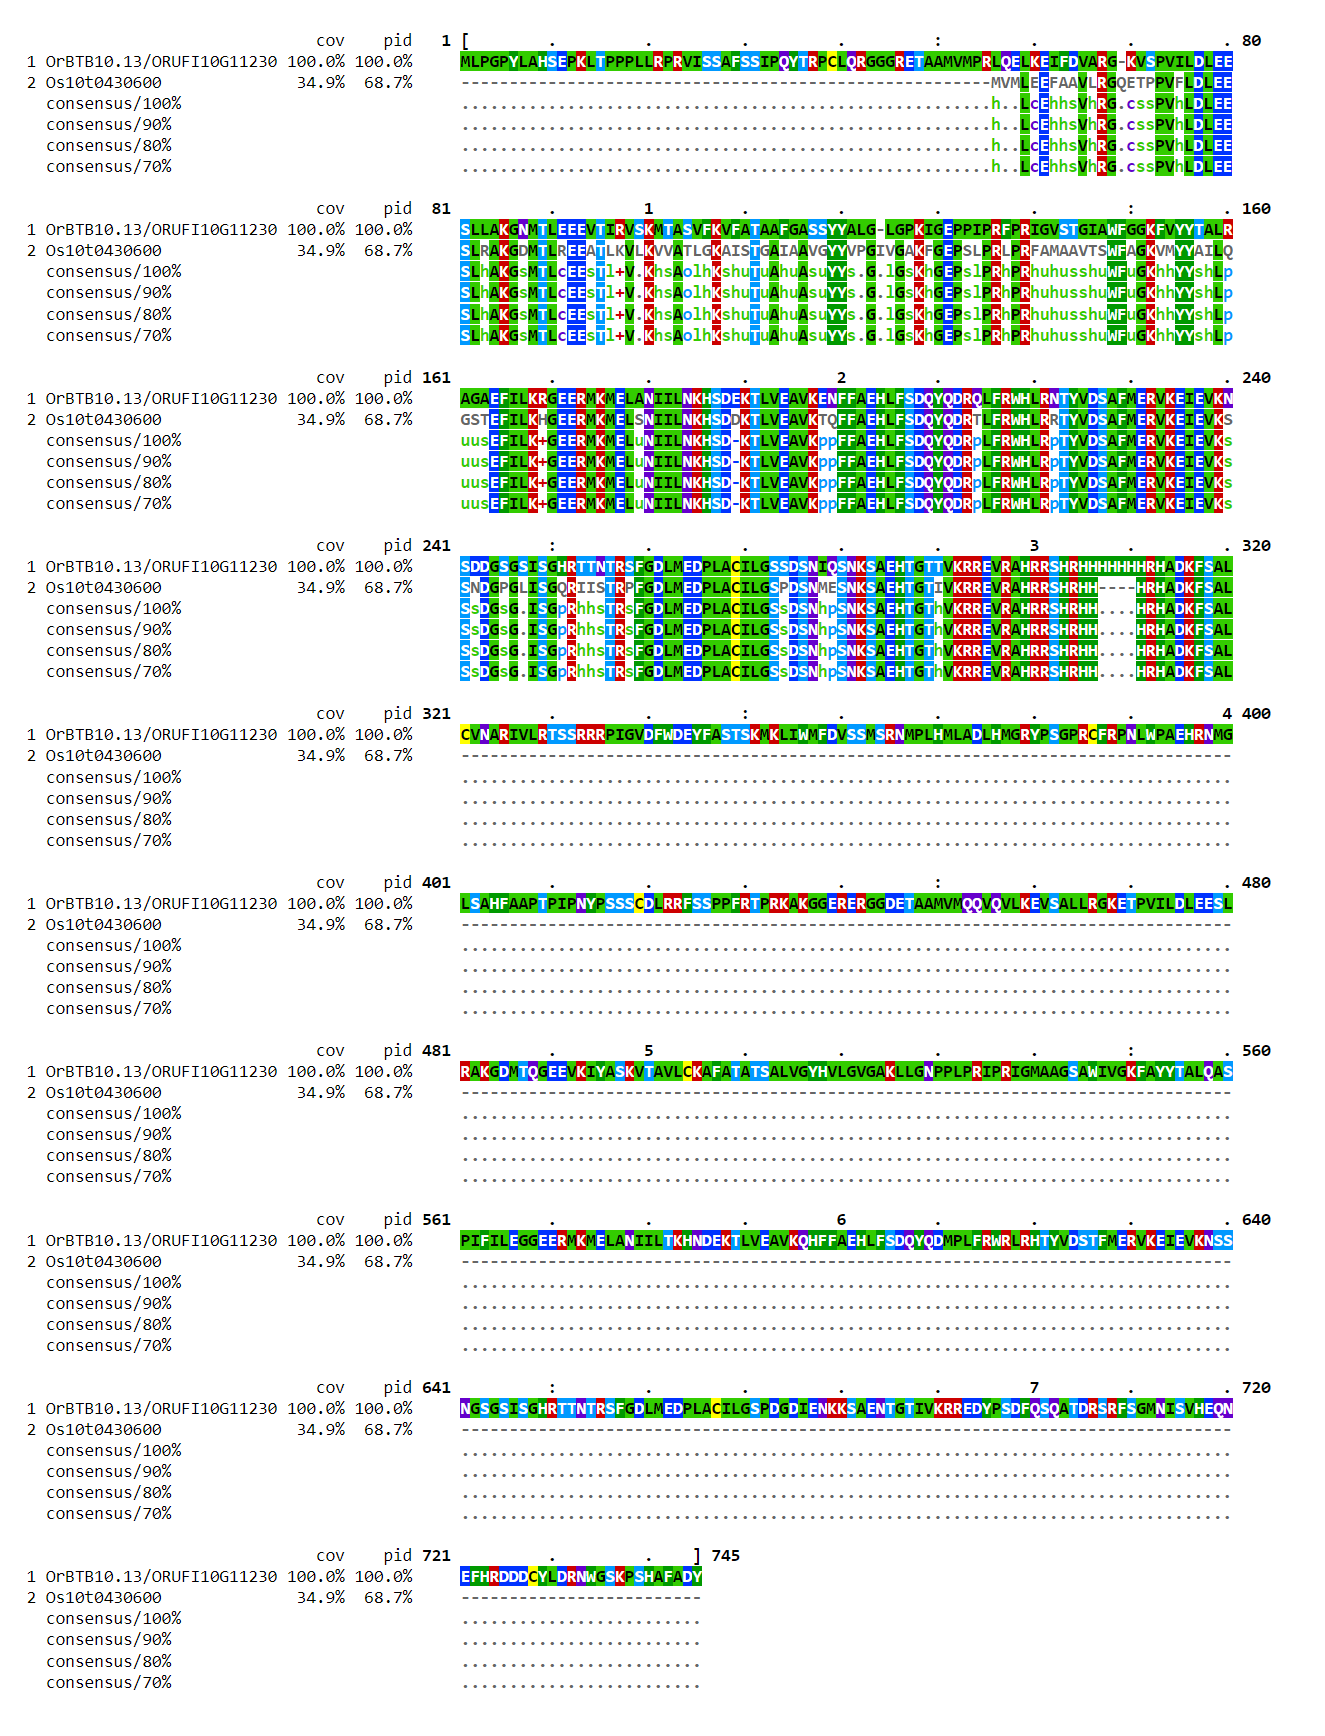


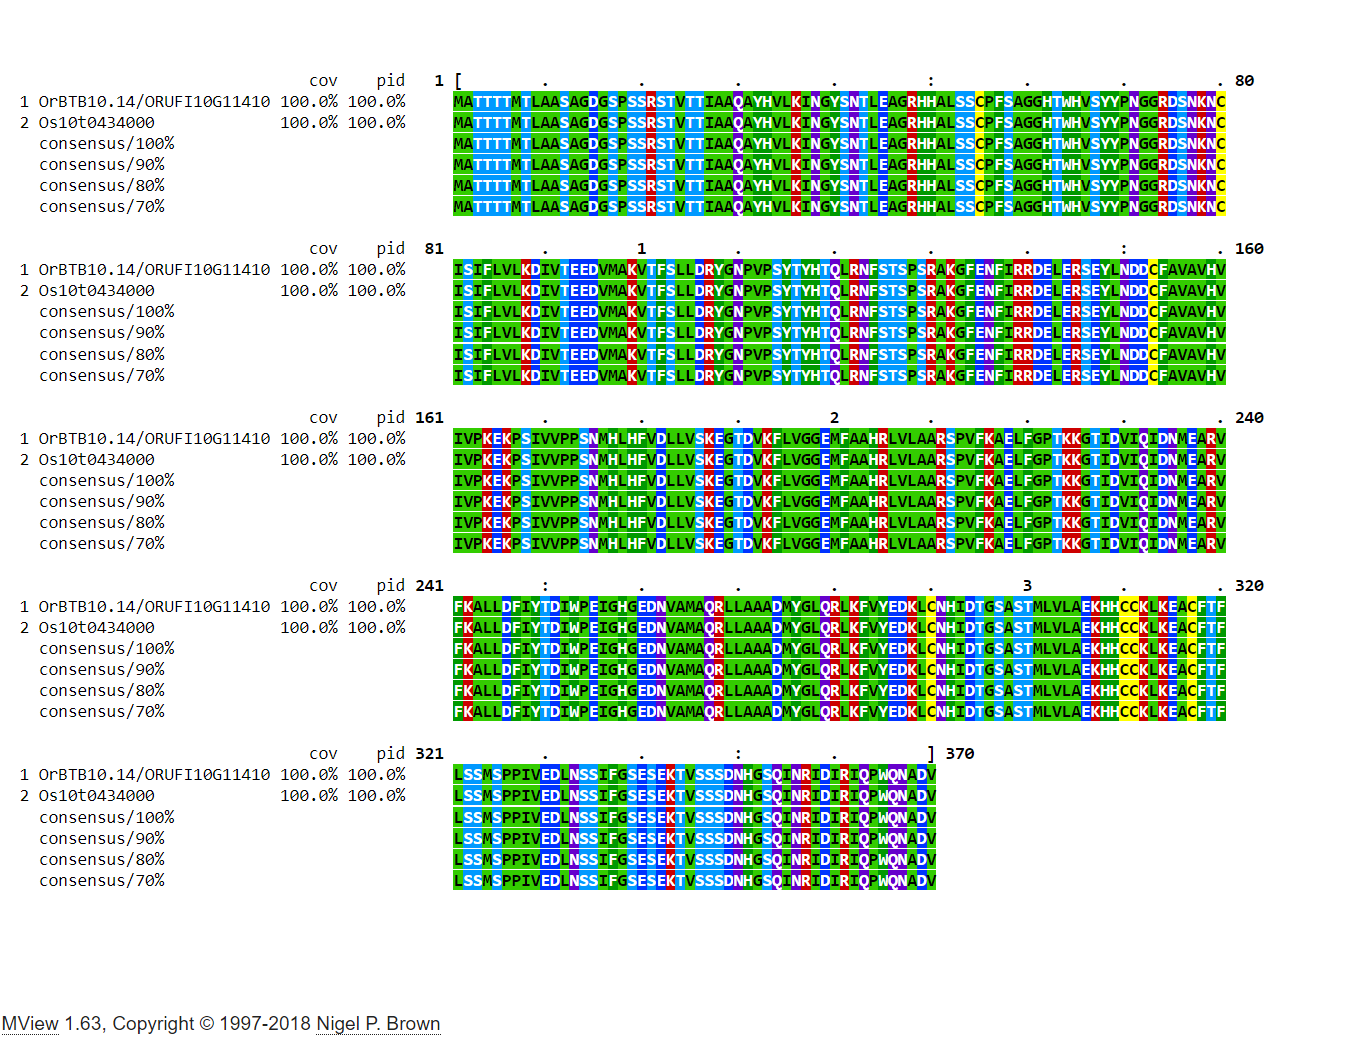


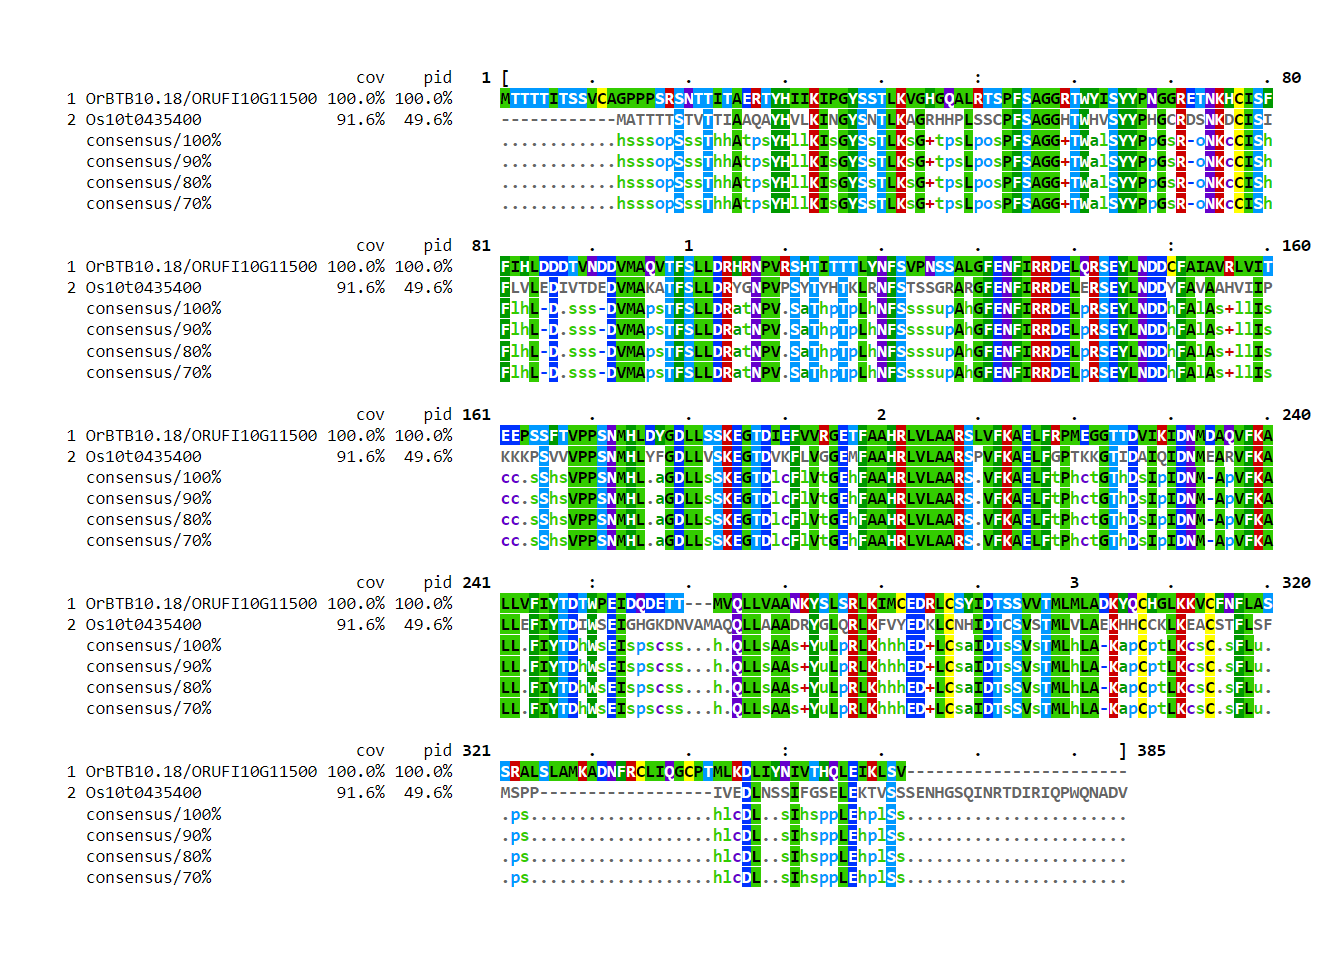


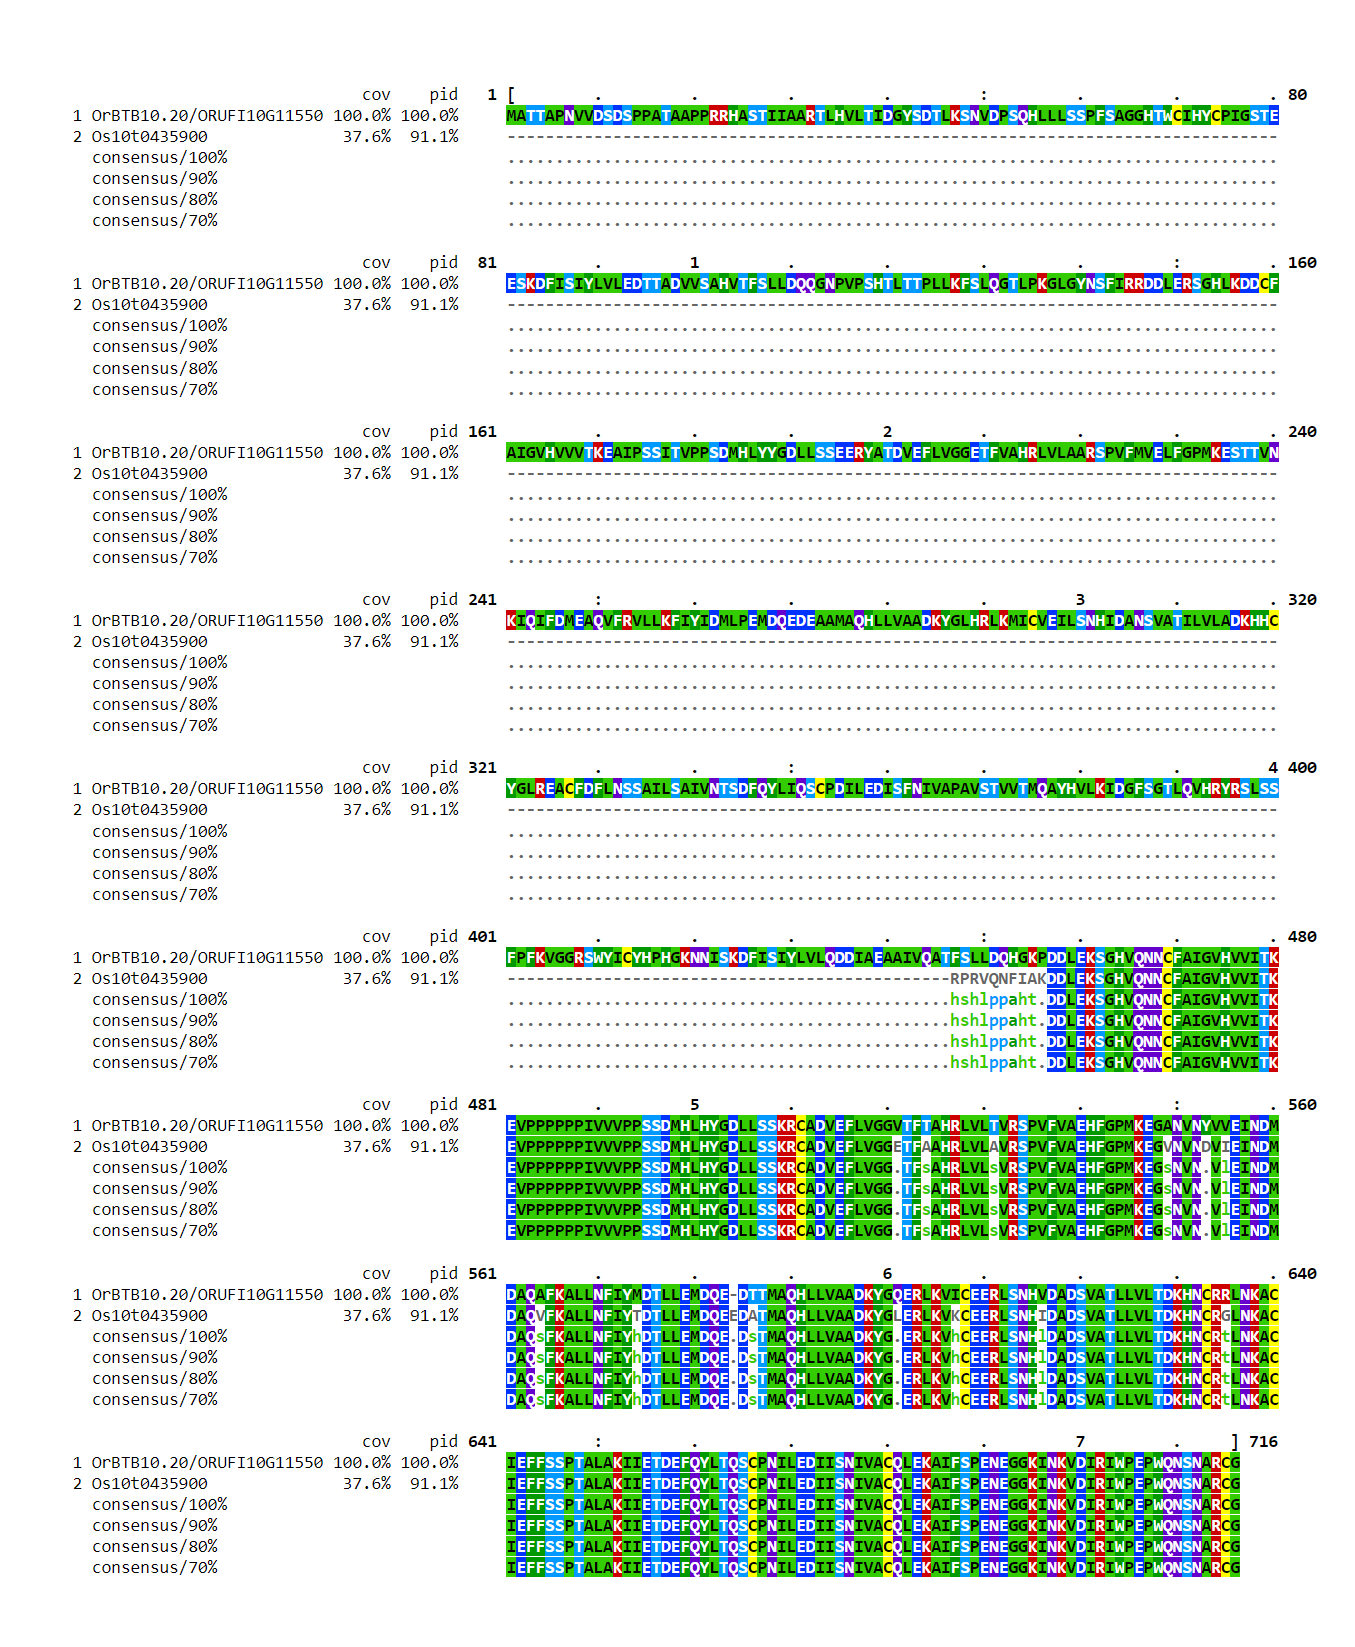


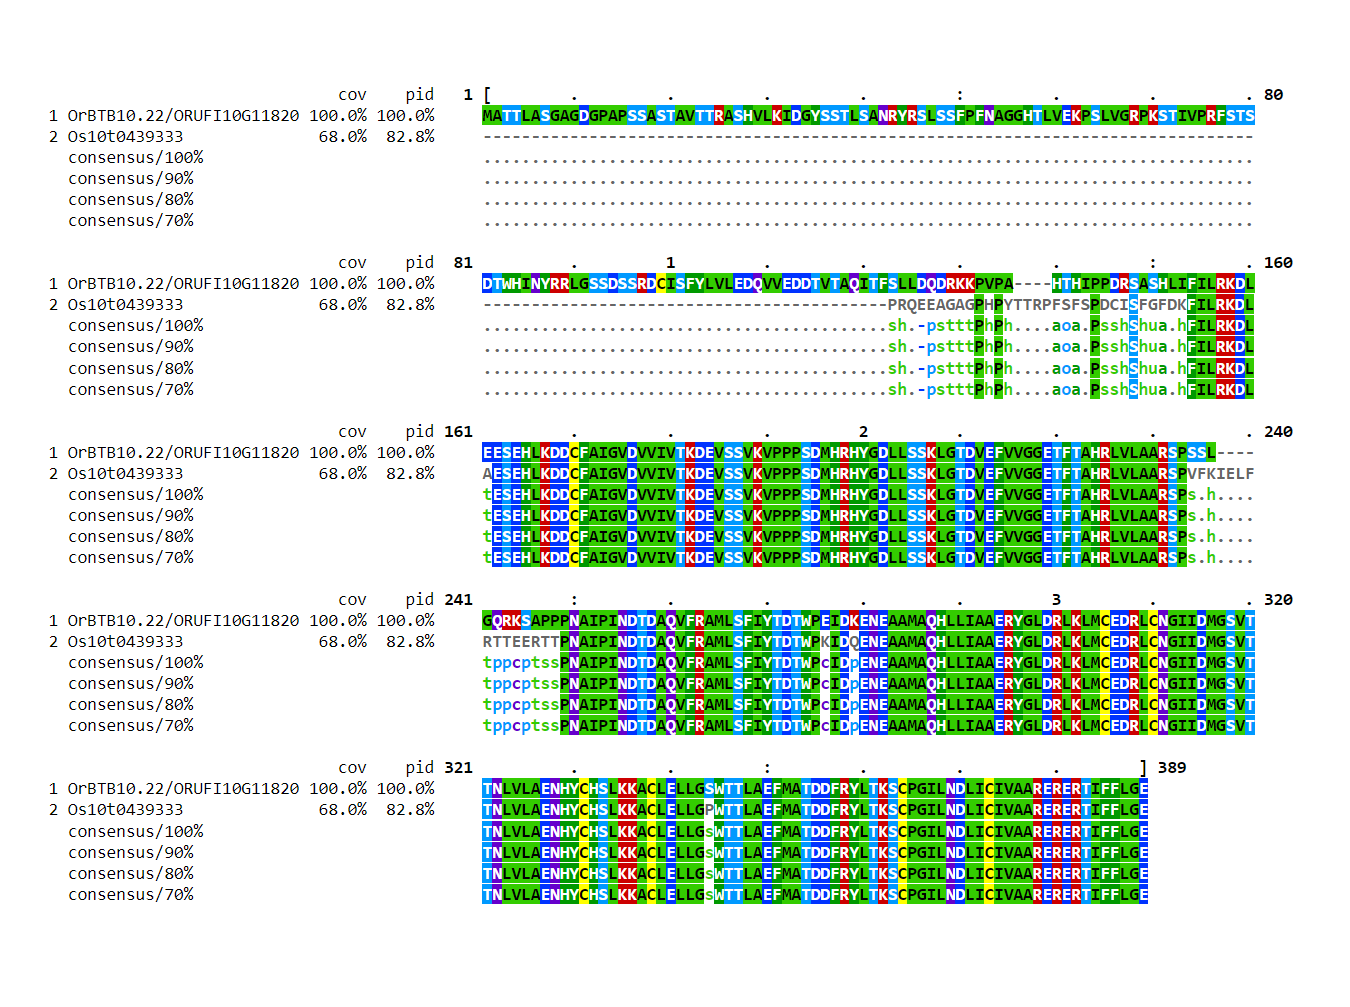


Supplementary Fig. S4: Multiple sequence alignment of subgroup OrBTB and OsBTB. Coverage and percentage identity values are indicated in the “cov” and “pid” columns, respectively.
