# Supplementary material for: BTB/POZ proteins and their gene family in Oryza rufipogon: Novel genes and alleles from the progenitor of the domesticated japonica rice (O. sativa L.)
Source: Research Square preprint supplement (doi:10.21203/rs.3.rs-1918471/v2), 2022-09-26
Supplement: Supplementary file 16 [file f64e8c2de9c5dcaf8ddba612.docx]

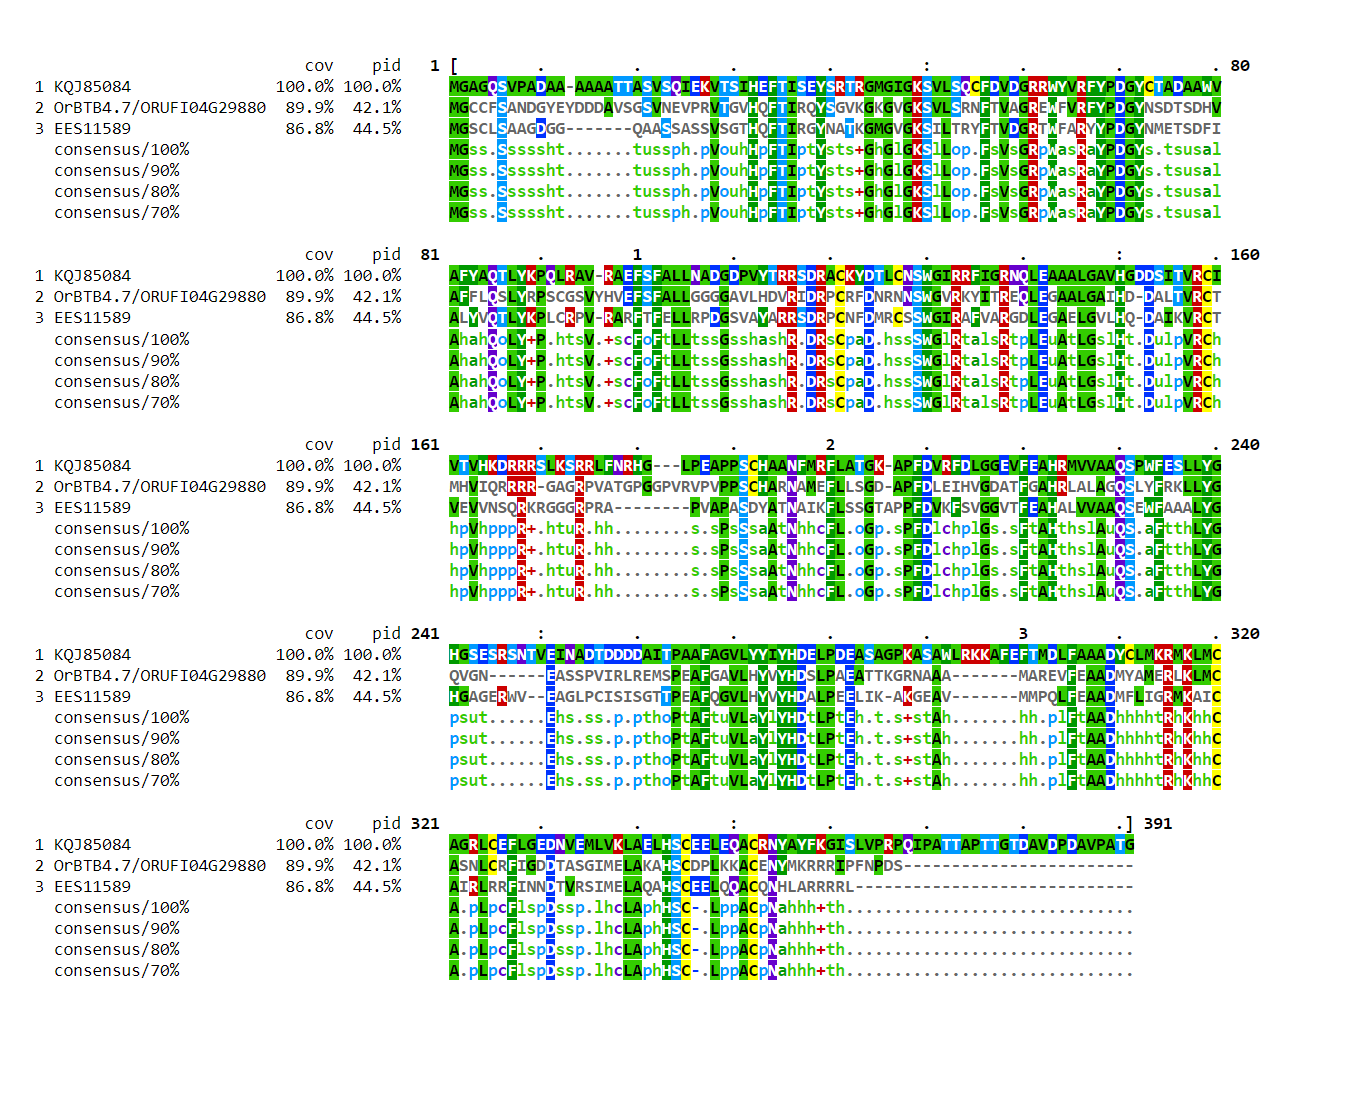


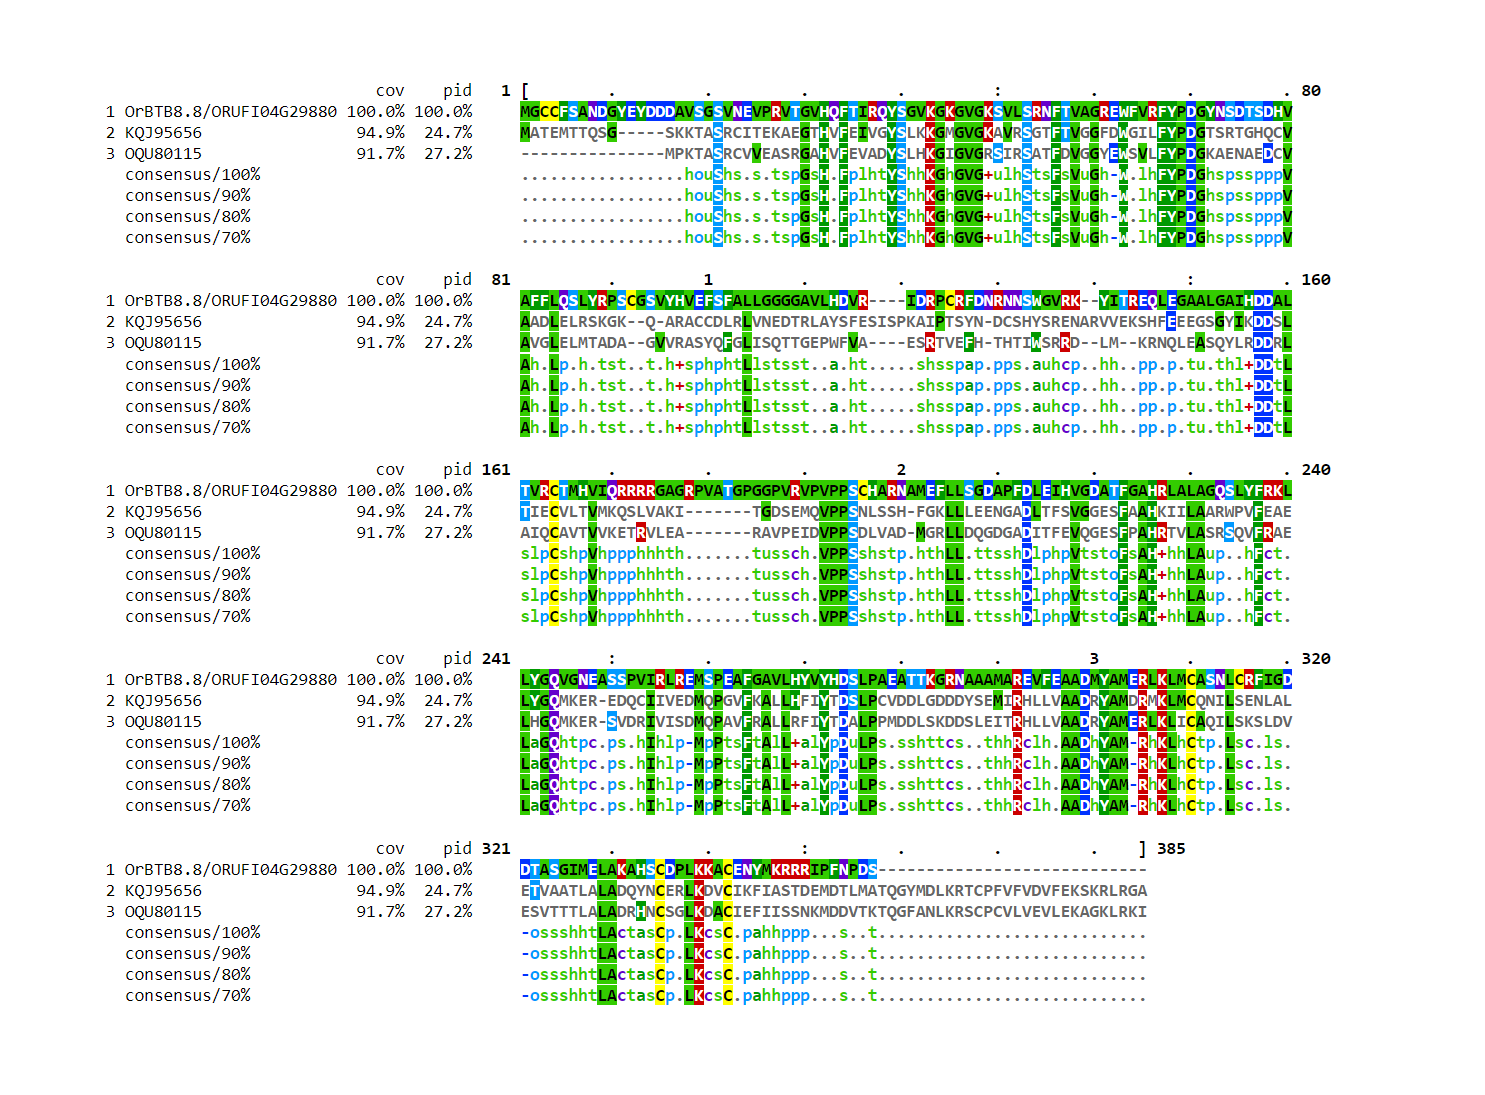


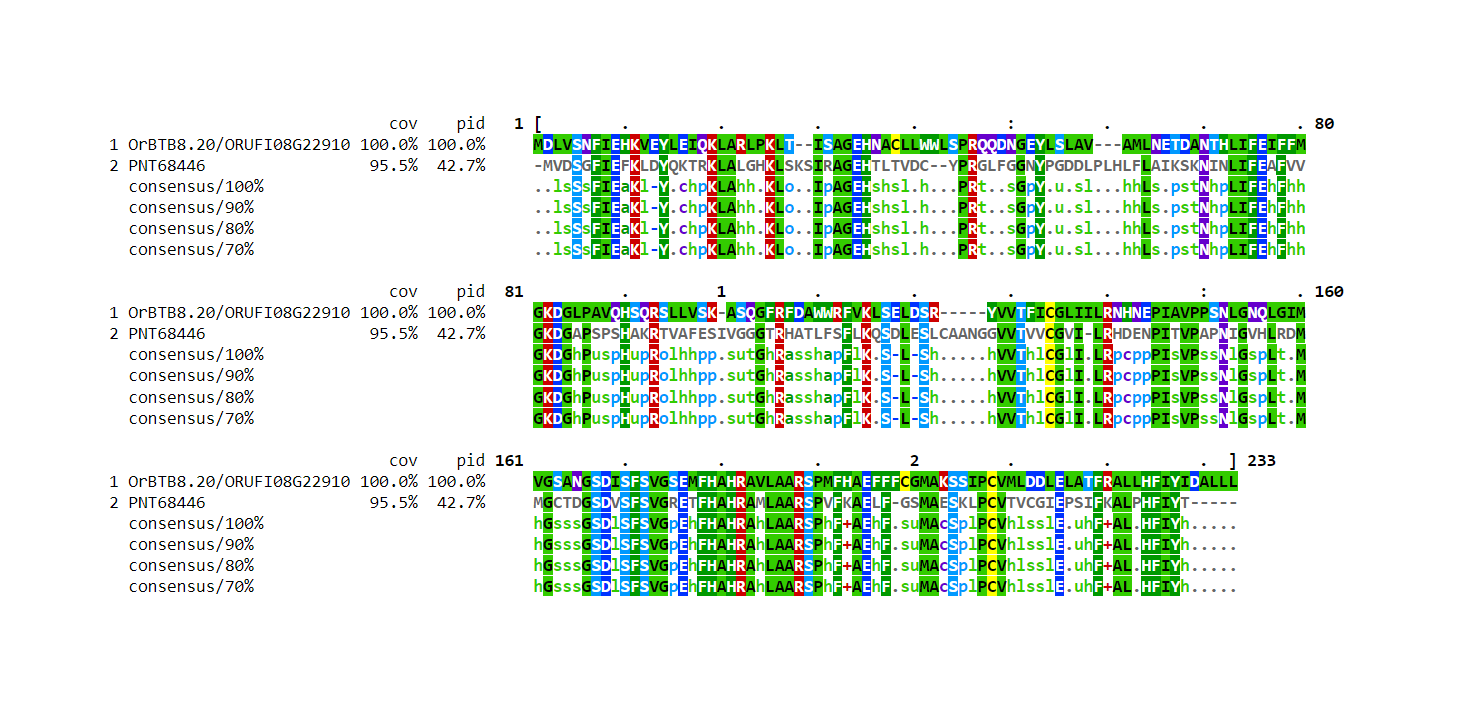


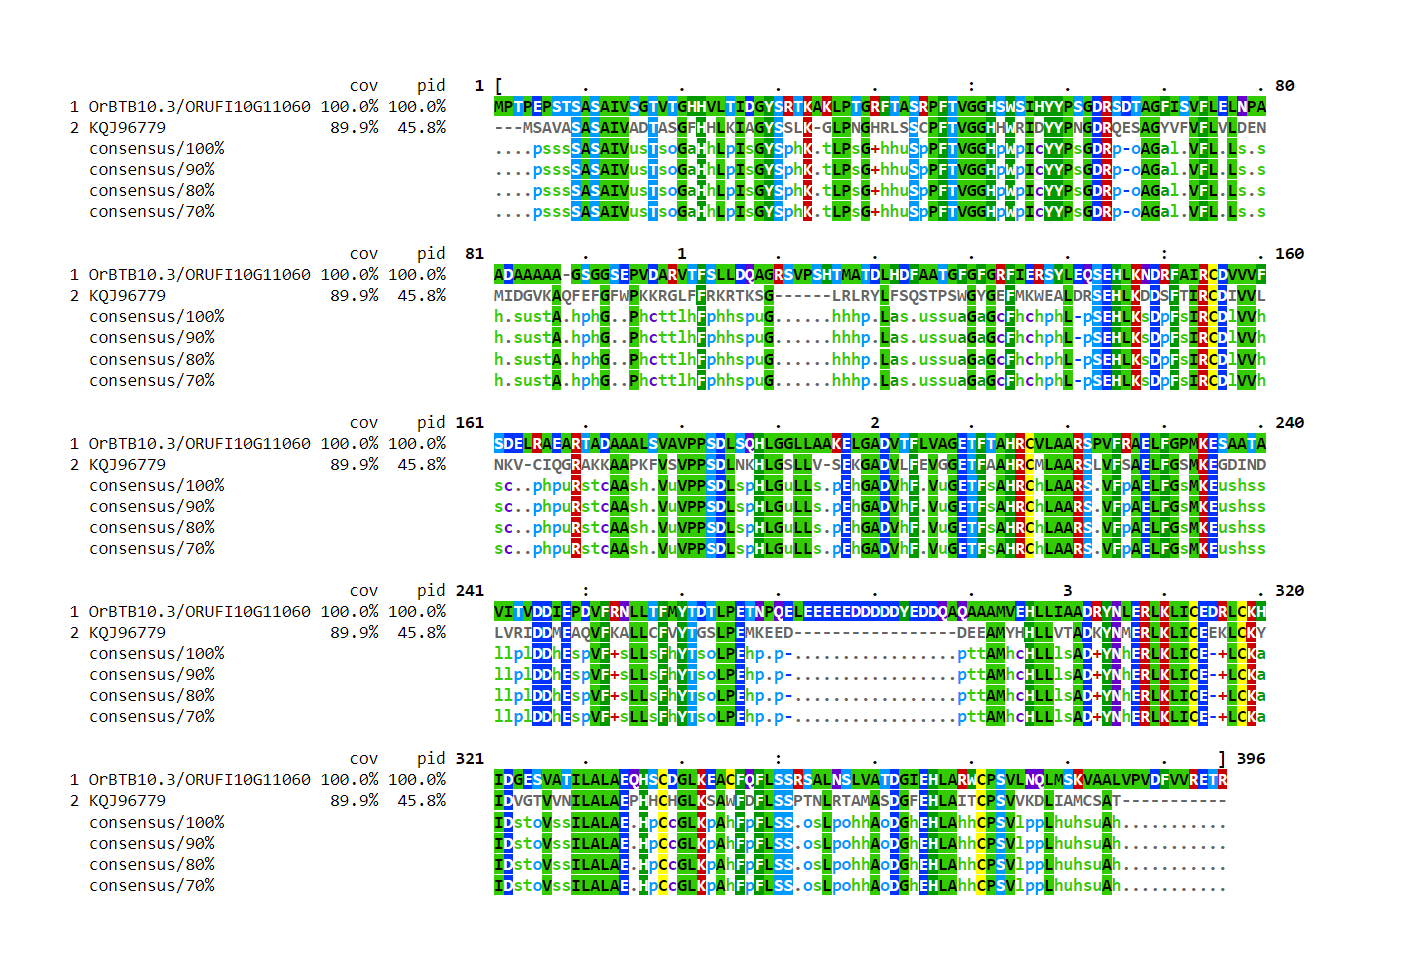


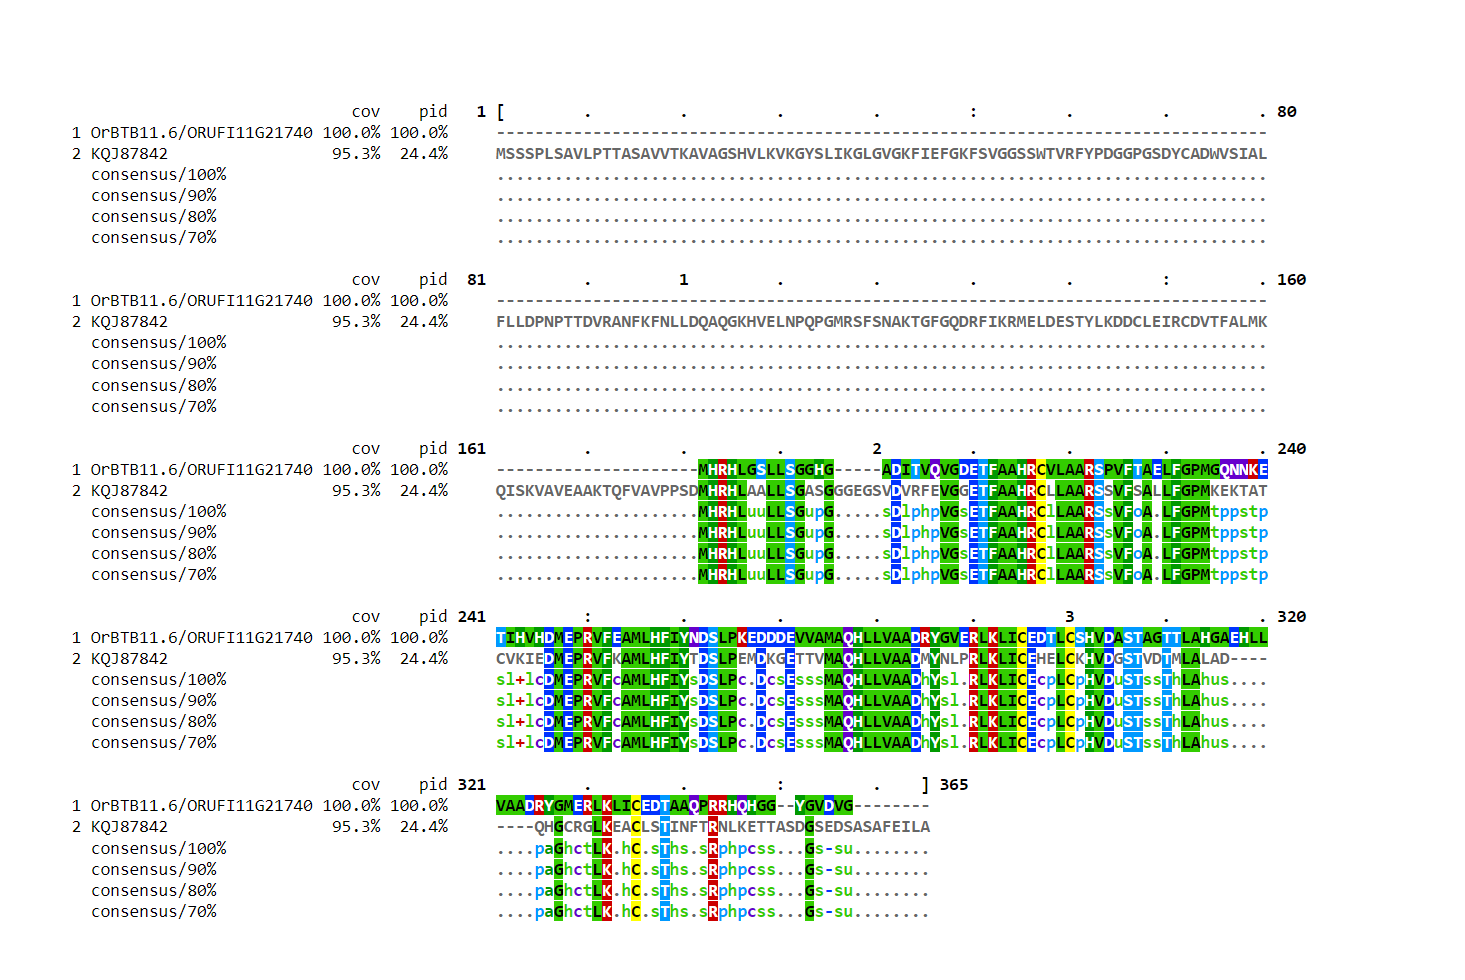


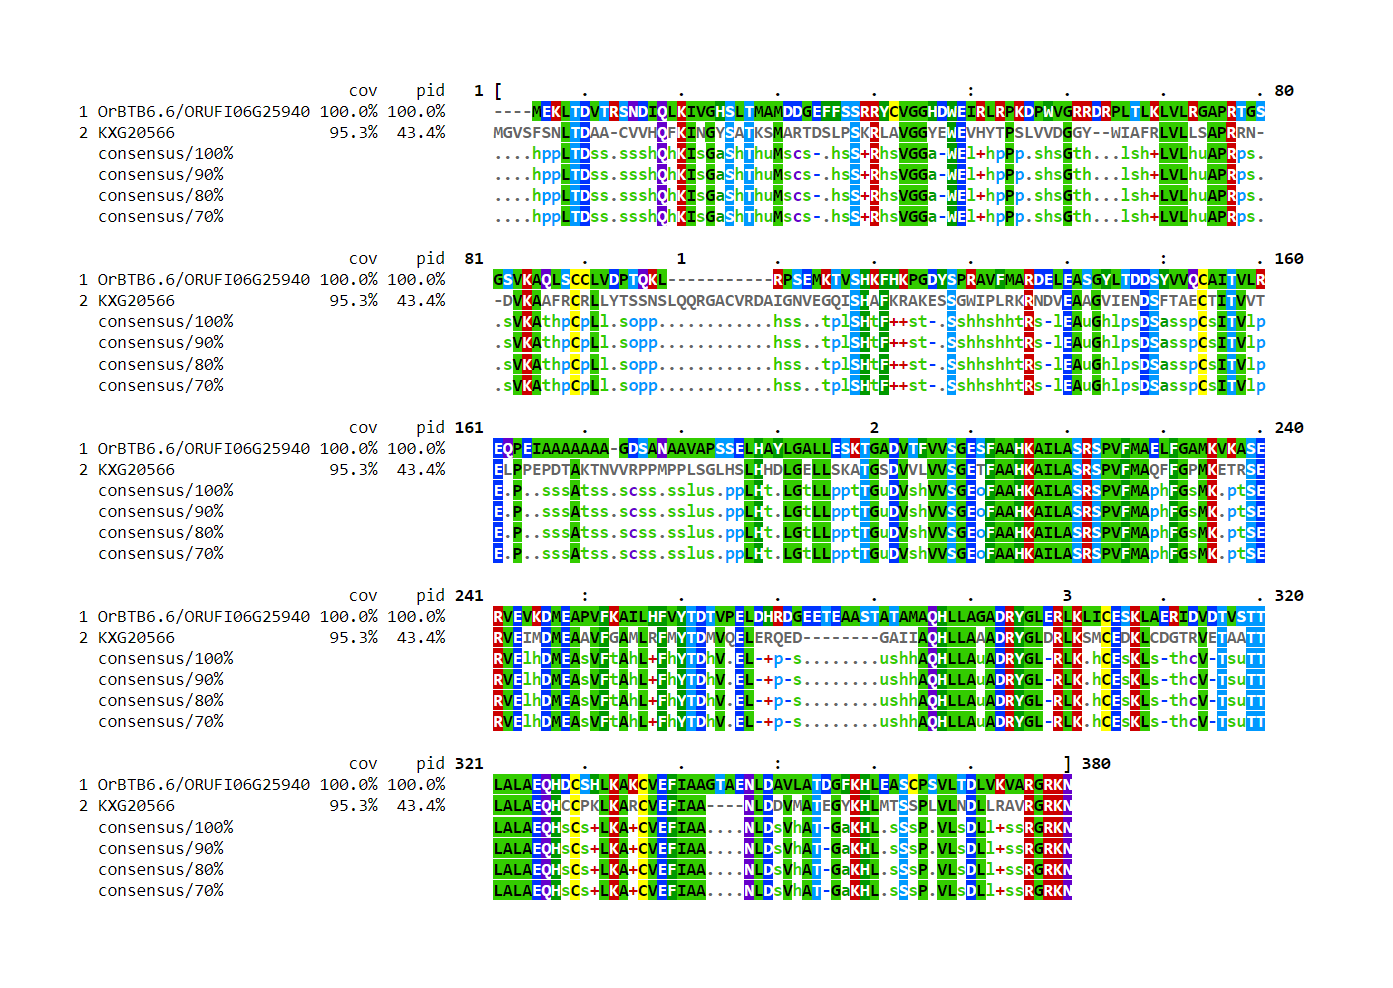


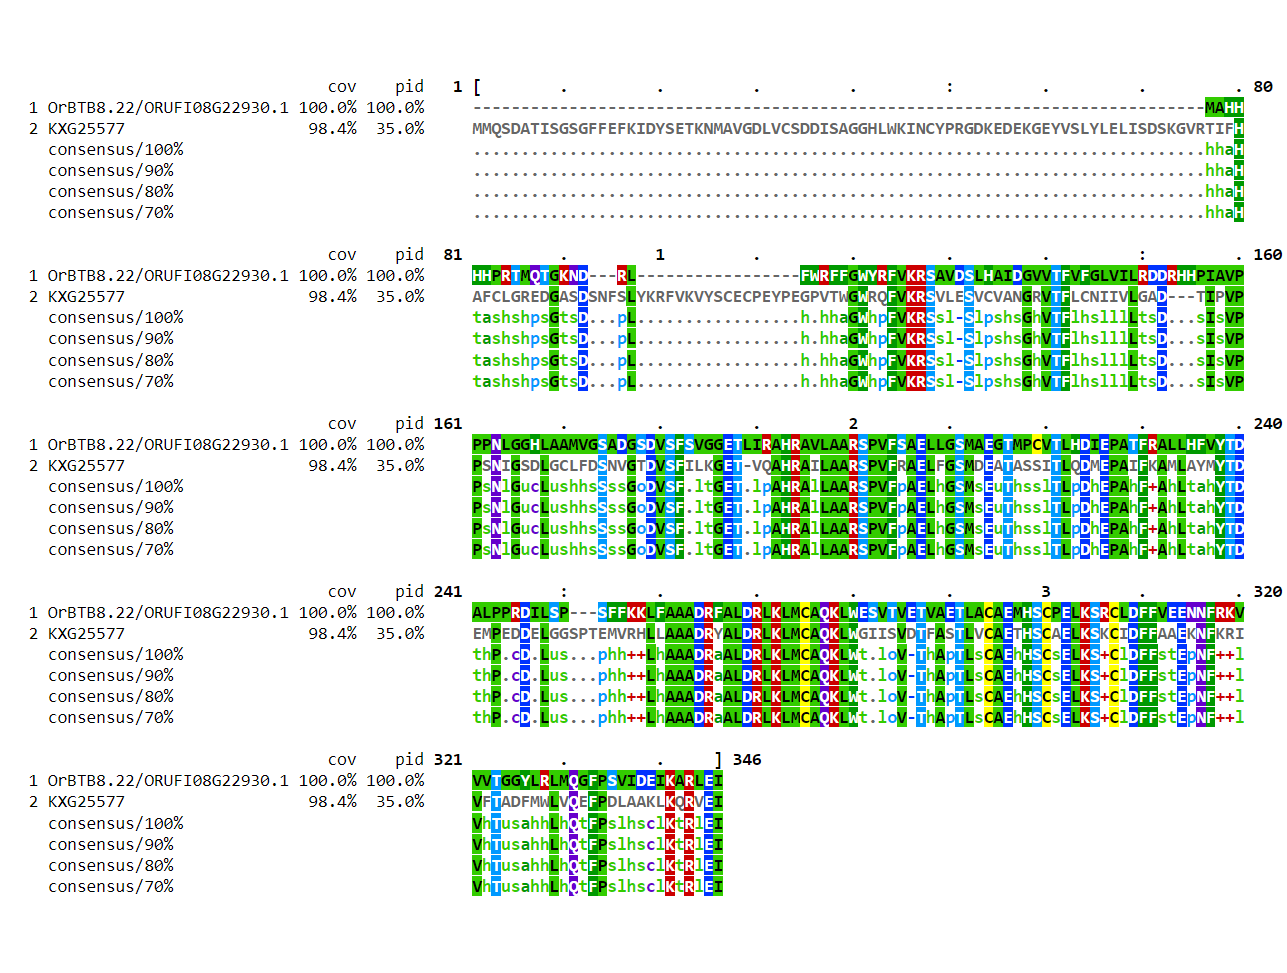


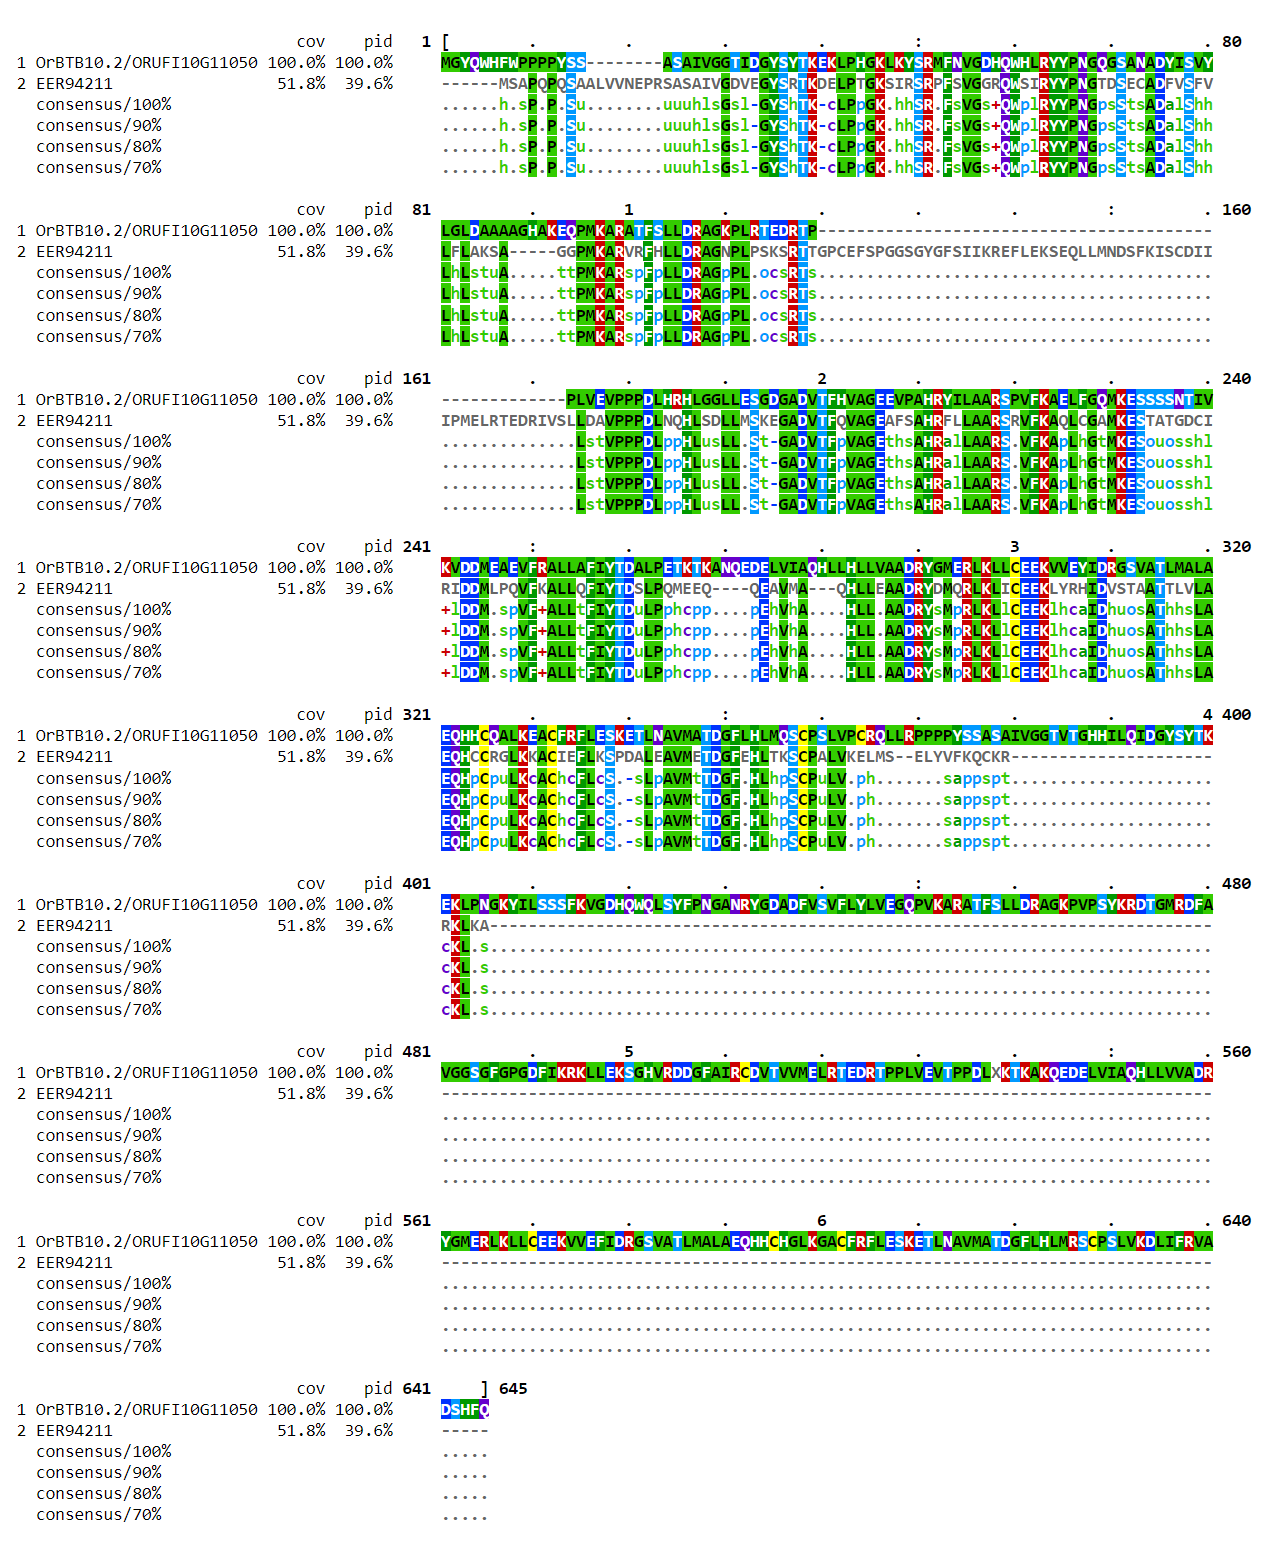


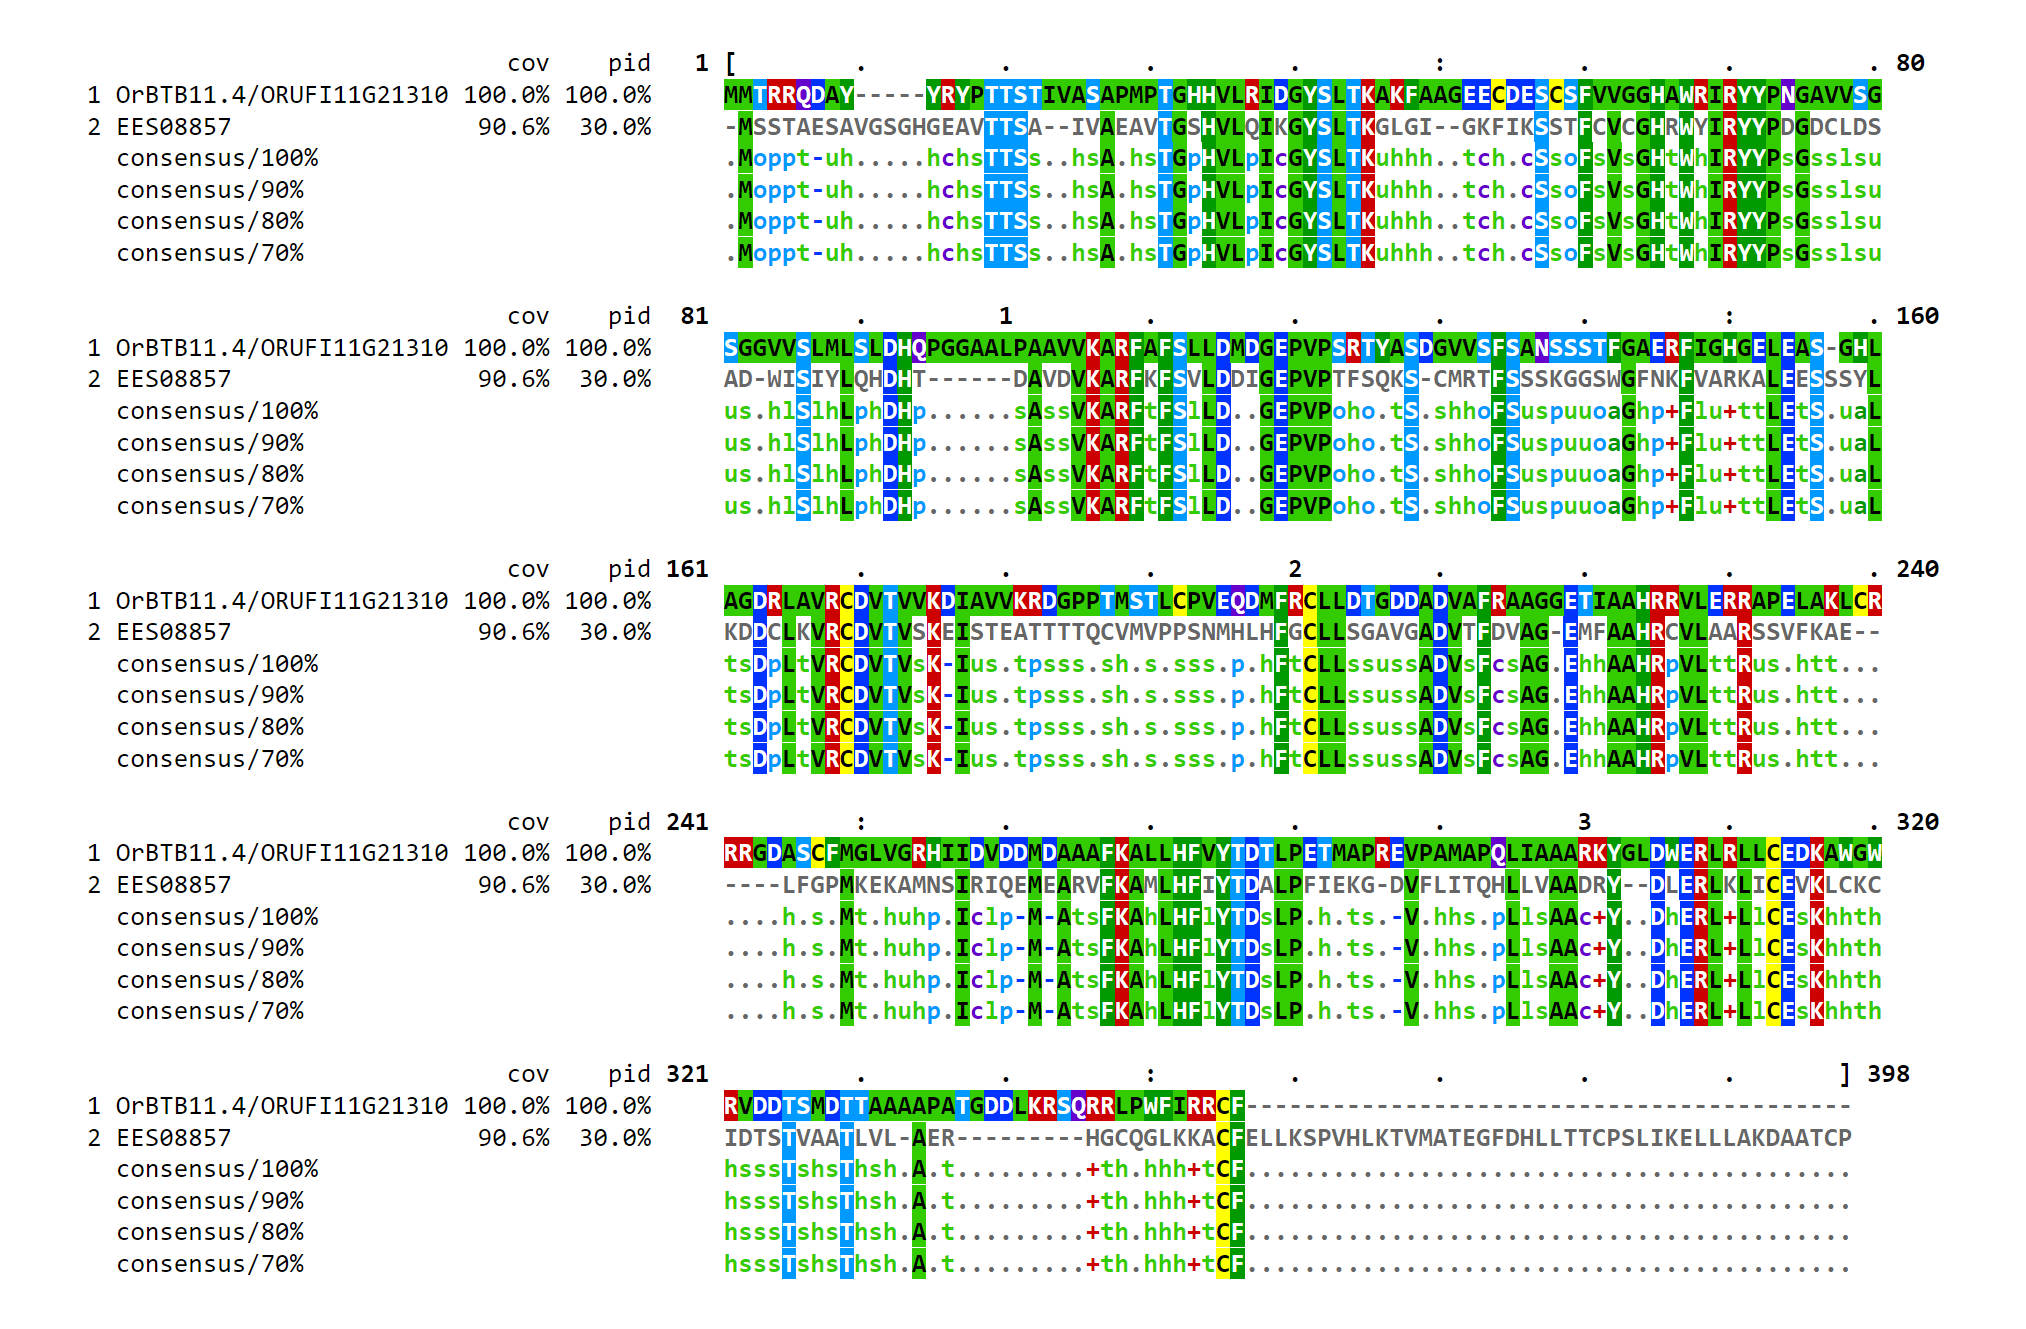


Supplementary Fig. S5: Multiple sequence alignment of subgroup *Oryza rufipogon* BTB/POZ genes with their orthologous from *Brachypodium distachyon* and *Sorghum bicolor*. Coverage and percentage identity values are indicated in the “cov” and “pid” columns, respectively.
